# Supplementary material for: Aedes aegypti from Amazon Basin Harbor High Diversity of Novel Viral Species
Source: MDPI journal article supplement (doi:10.3390/v12080866), 2020-08-08
Supplement: s1 [file s1]

Supplementary materials

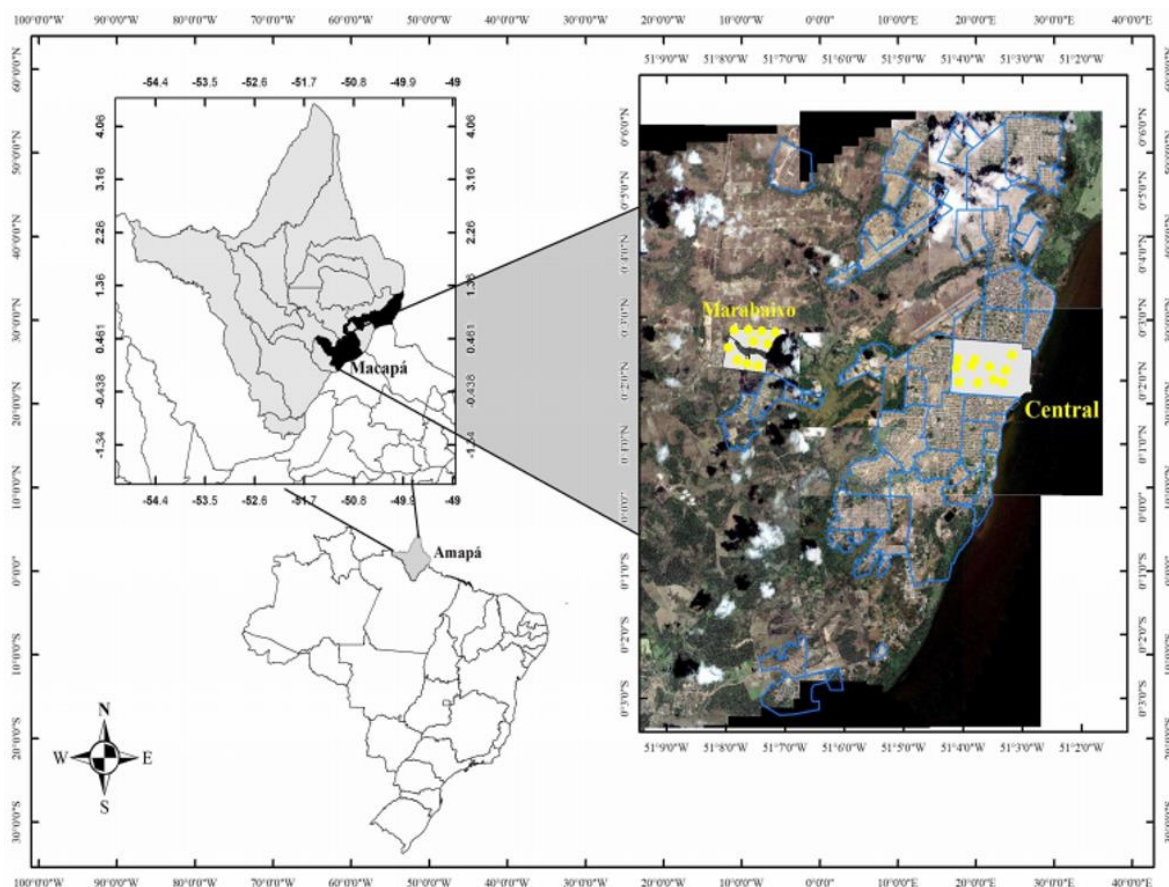

**Figure S1.** Map showing the coordinates where mosquitoes were captured in Brazil. Amapá state is shown in the north of Brazil. The locations of 21 points where samples were collected were shown in an aerial view in the vicinity of Macapá city.

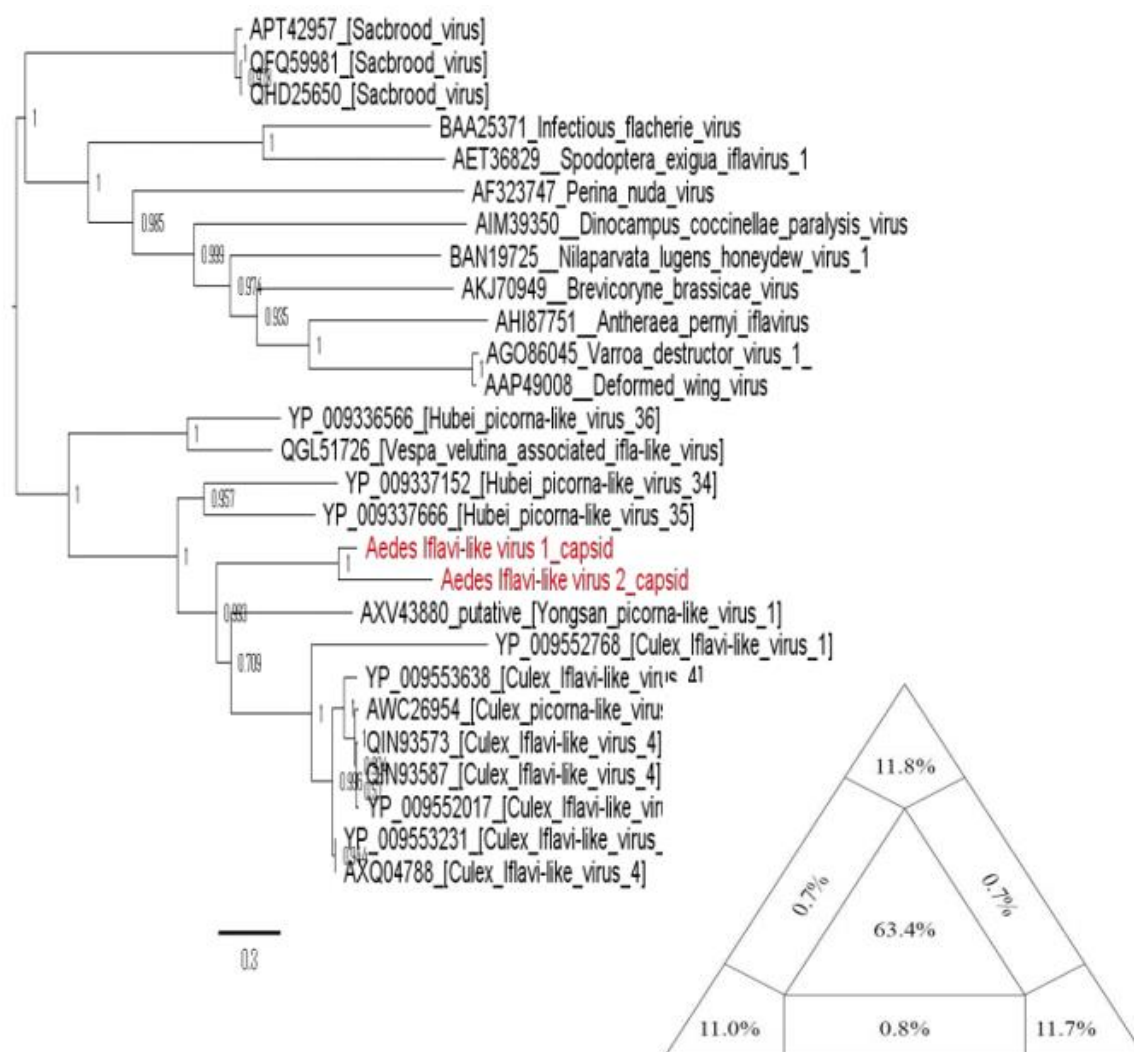

**Figure S2.** Phylogenetic tree of Iflavi-like virus and Iflavivirus genus members based on the alignment of capsid region protein. *Aedes Iflavi-like virus 1* and *Aedes Iflavi-like virus 2* are highlighted in red. This tree was made using the maximum likelihood methods assuming VT model and values on the nodes of the tree indicate the statistical support based on the approximate likelihood-ratio test (aLRT). The diagram in the base of the tree is a likelihood map of the nucleotide alignment of the genomes of Iflavi-related and iflaviviruses. The likelihood quartet mapping is a method that allows to visualize the tree-likeness of all quartets in a single graph and provides a direct measure of the phylogenetic signal in an alignment. The triangle shows the locations of all quartets calculated with the alignment used to infer the ML tree. Values in the center of the triangle represent the percentage of unresolved quartet trees (star-like trees), values in the vertices represent the percentage of fully resolved trees and values in the intermediate areas (between vertices) are the percentage of conflicting trees. The analysis was performed using JTT model as is implemented in the tree puzzle software v 5.3 (<https://www.tree-puzzle.de>).

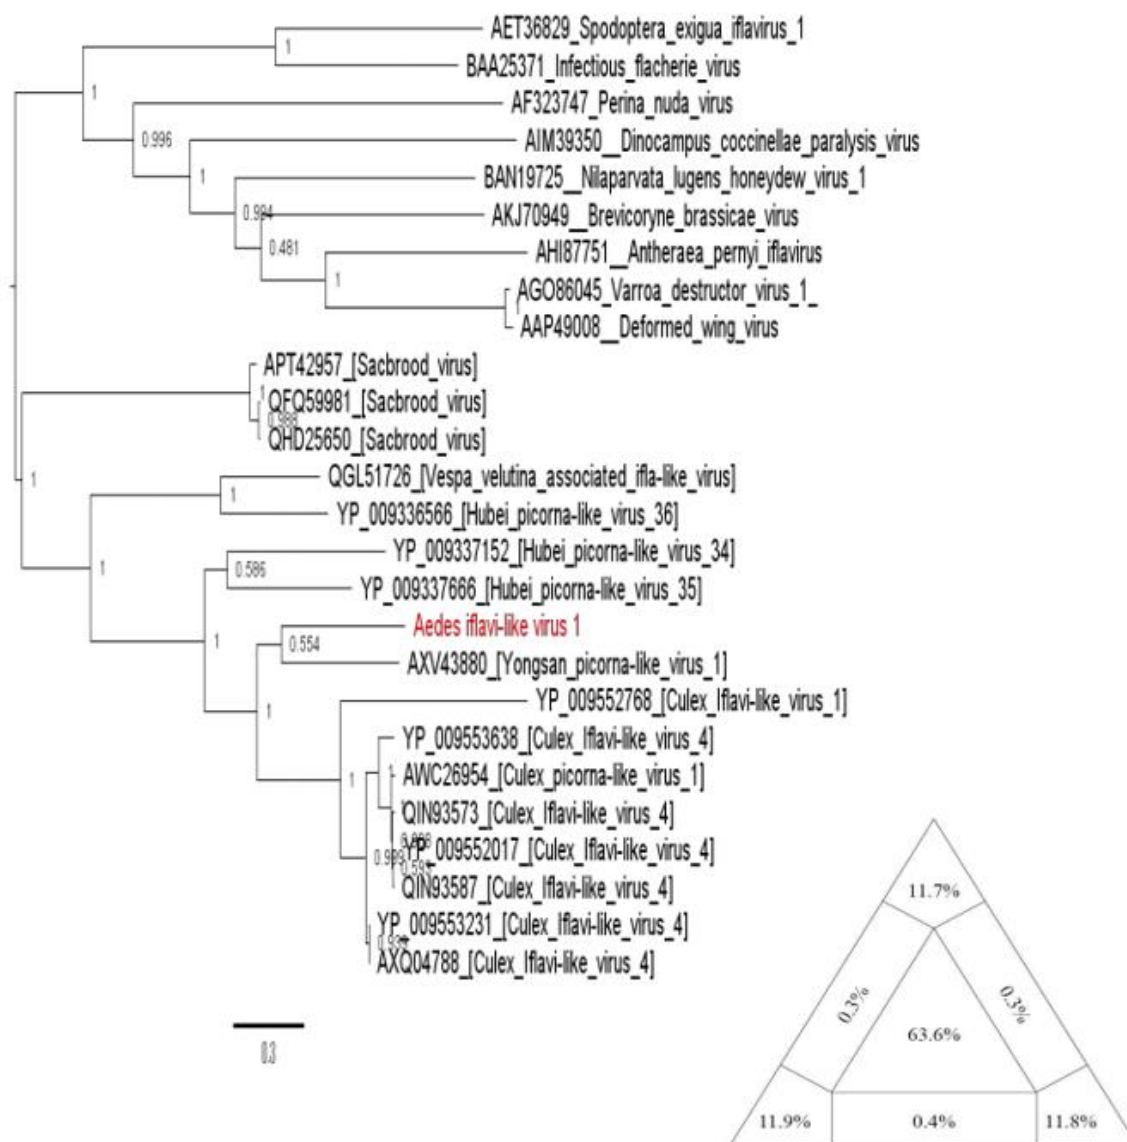

**Figure S3.** Phylogenetic tree of Iflavi-like virus and Iflavivirus genus members based on the alignment of helicase region protein. *Aedes Iflavi-like virus 1* is highlighted in red. This tree was made using the maximum likelihood methods assuming VT model and values on the nodes of the tree indicate the statistical support based on the approximate likelihood-ratio test (aLRT). The diagram in the base of the tree is the a likelihood map of the nucleotide alignment of genomes of Iflavi-like virus and Iflavivirus. The likelihood quartet mapping is a method that allows to visualize the tree-likeness of all quartets in a single graph and provides a direct measure of the phylogenetic signal in an alignment. The triangle shows the location of all quartets calculated with the alignment used to infer the ML tree. Values in the center of the triangle represent the percentage of unresolved quartet trees (star-like trees), values in the vertices represent the percentage of fully resolved trees and values in the intermediate areas (between vertices) are the percentage of conflicting trees. The analysis was performed using JTT model as implemented in the tree puzzle software v 5.3 (<https://www.tree-puzzle.de>).

FIGURE s4

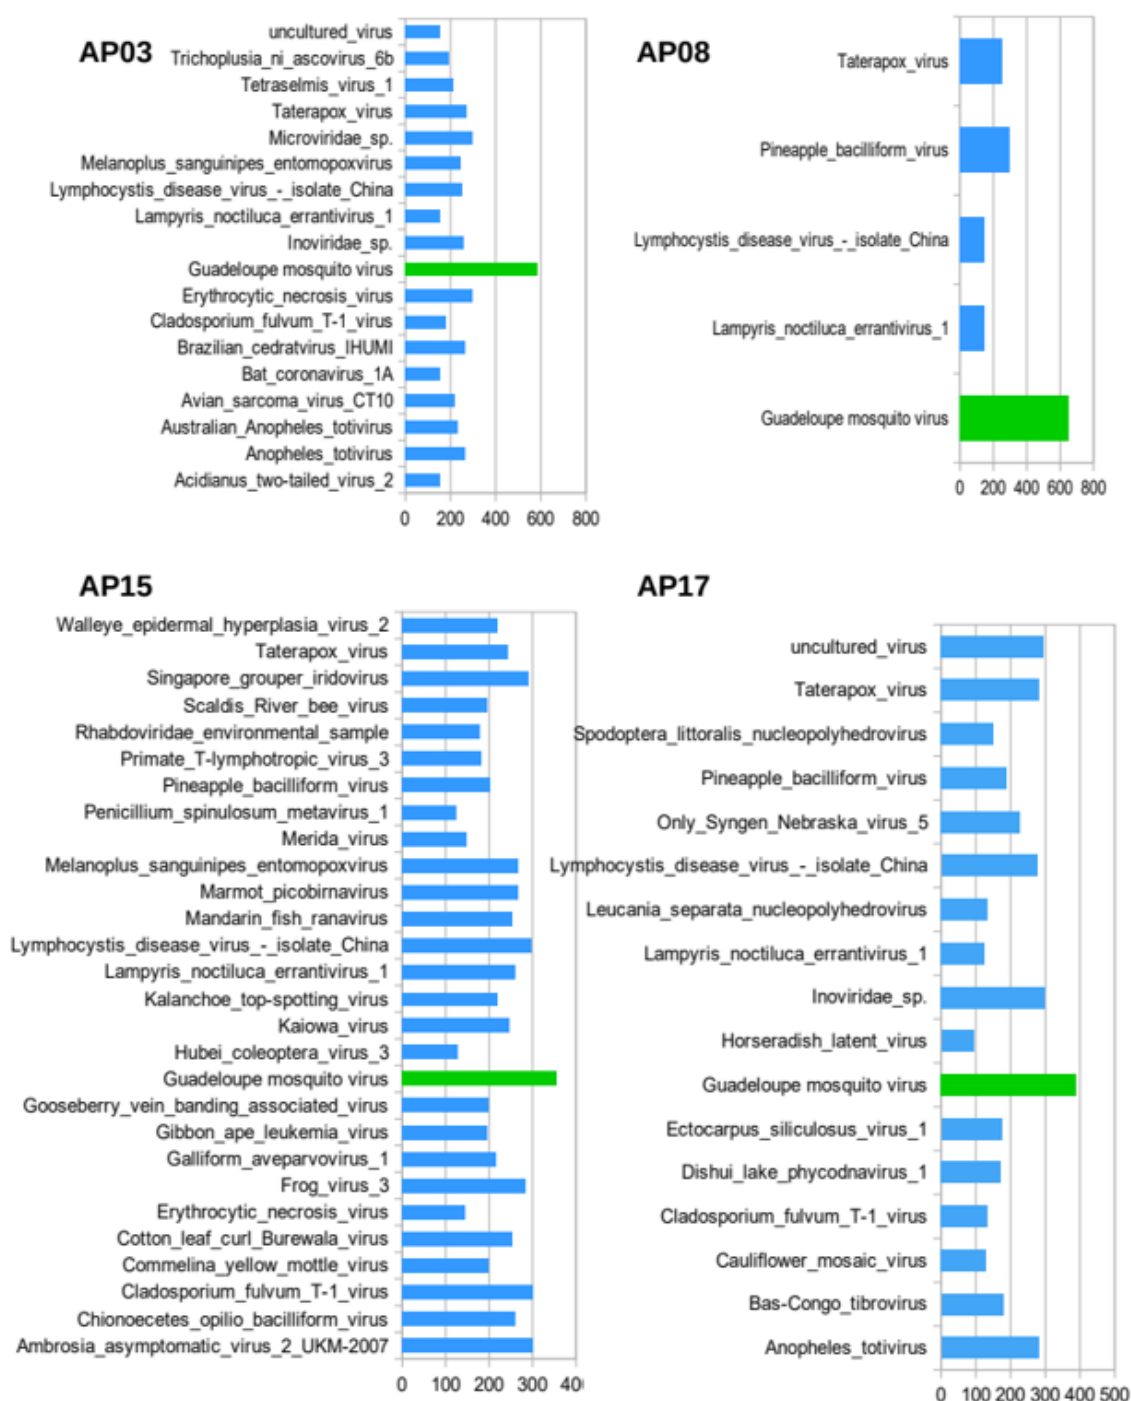

FIGURE s5

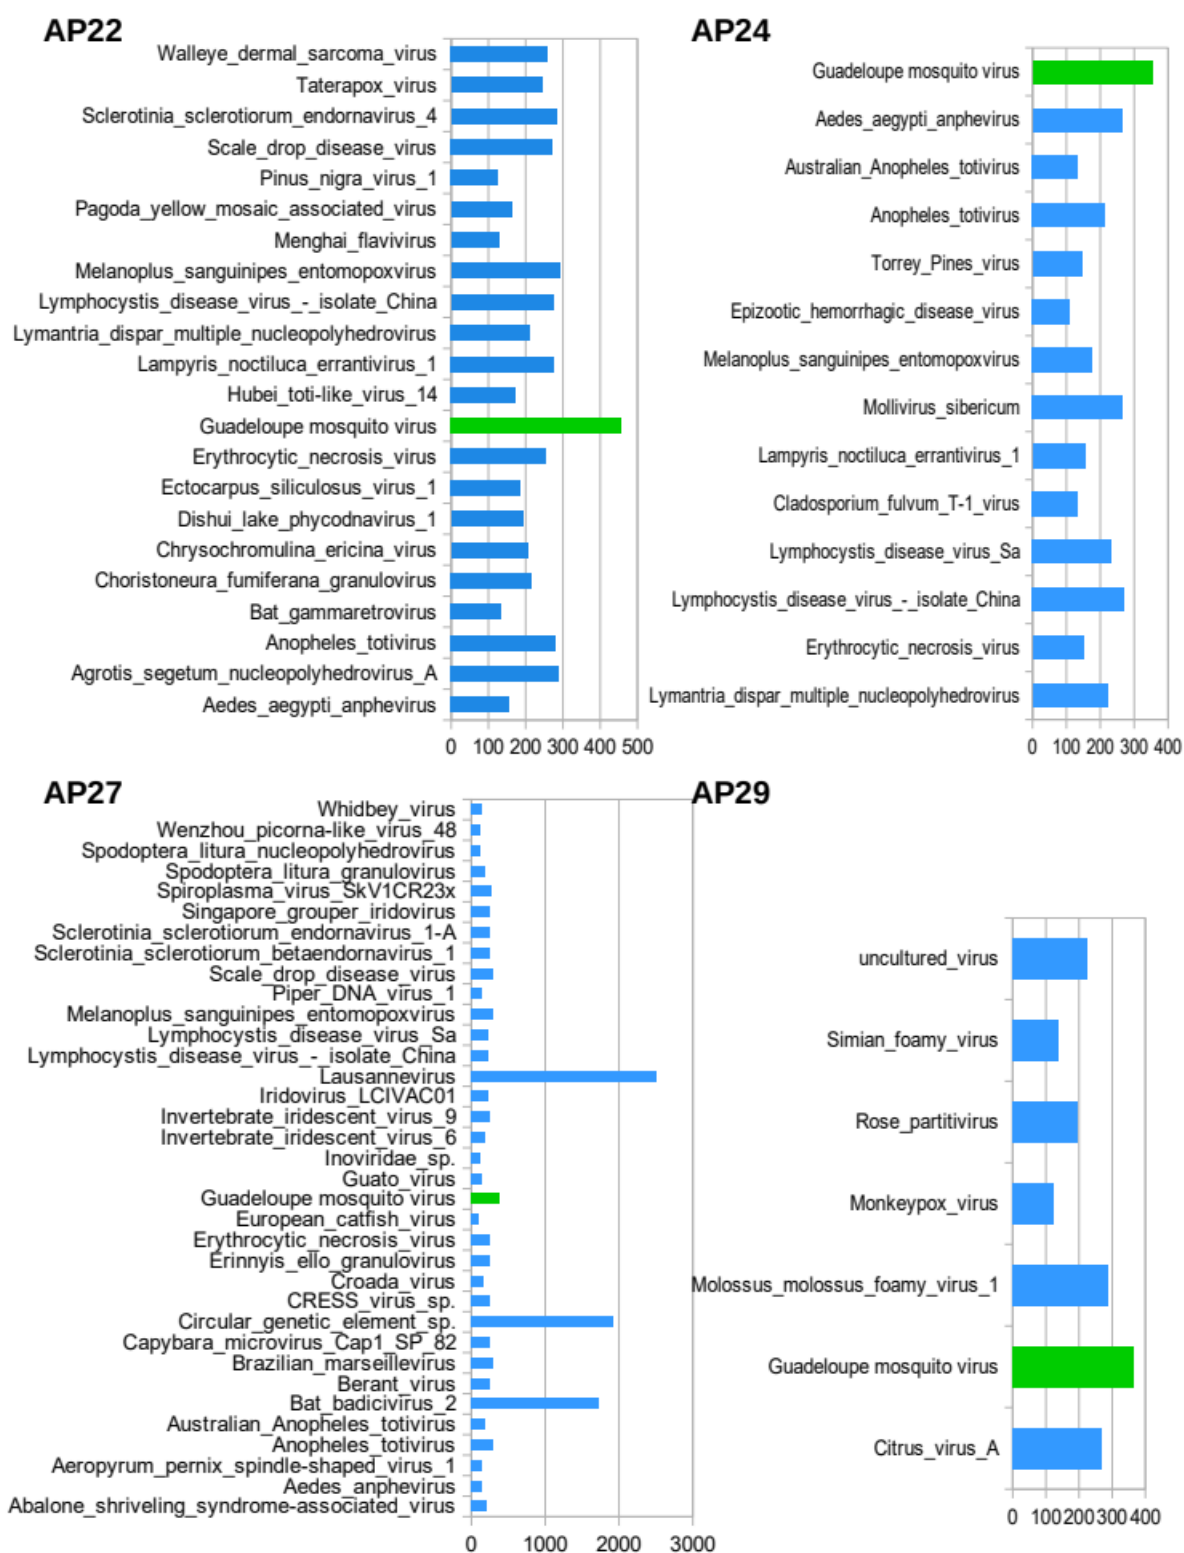

FIGURE S6

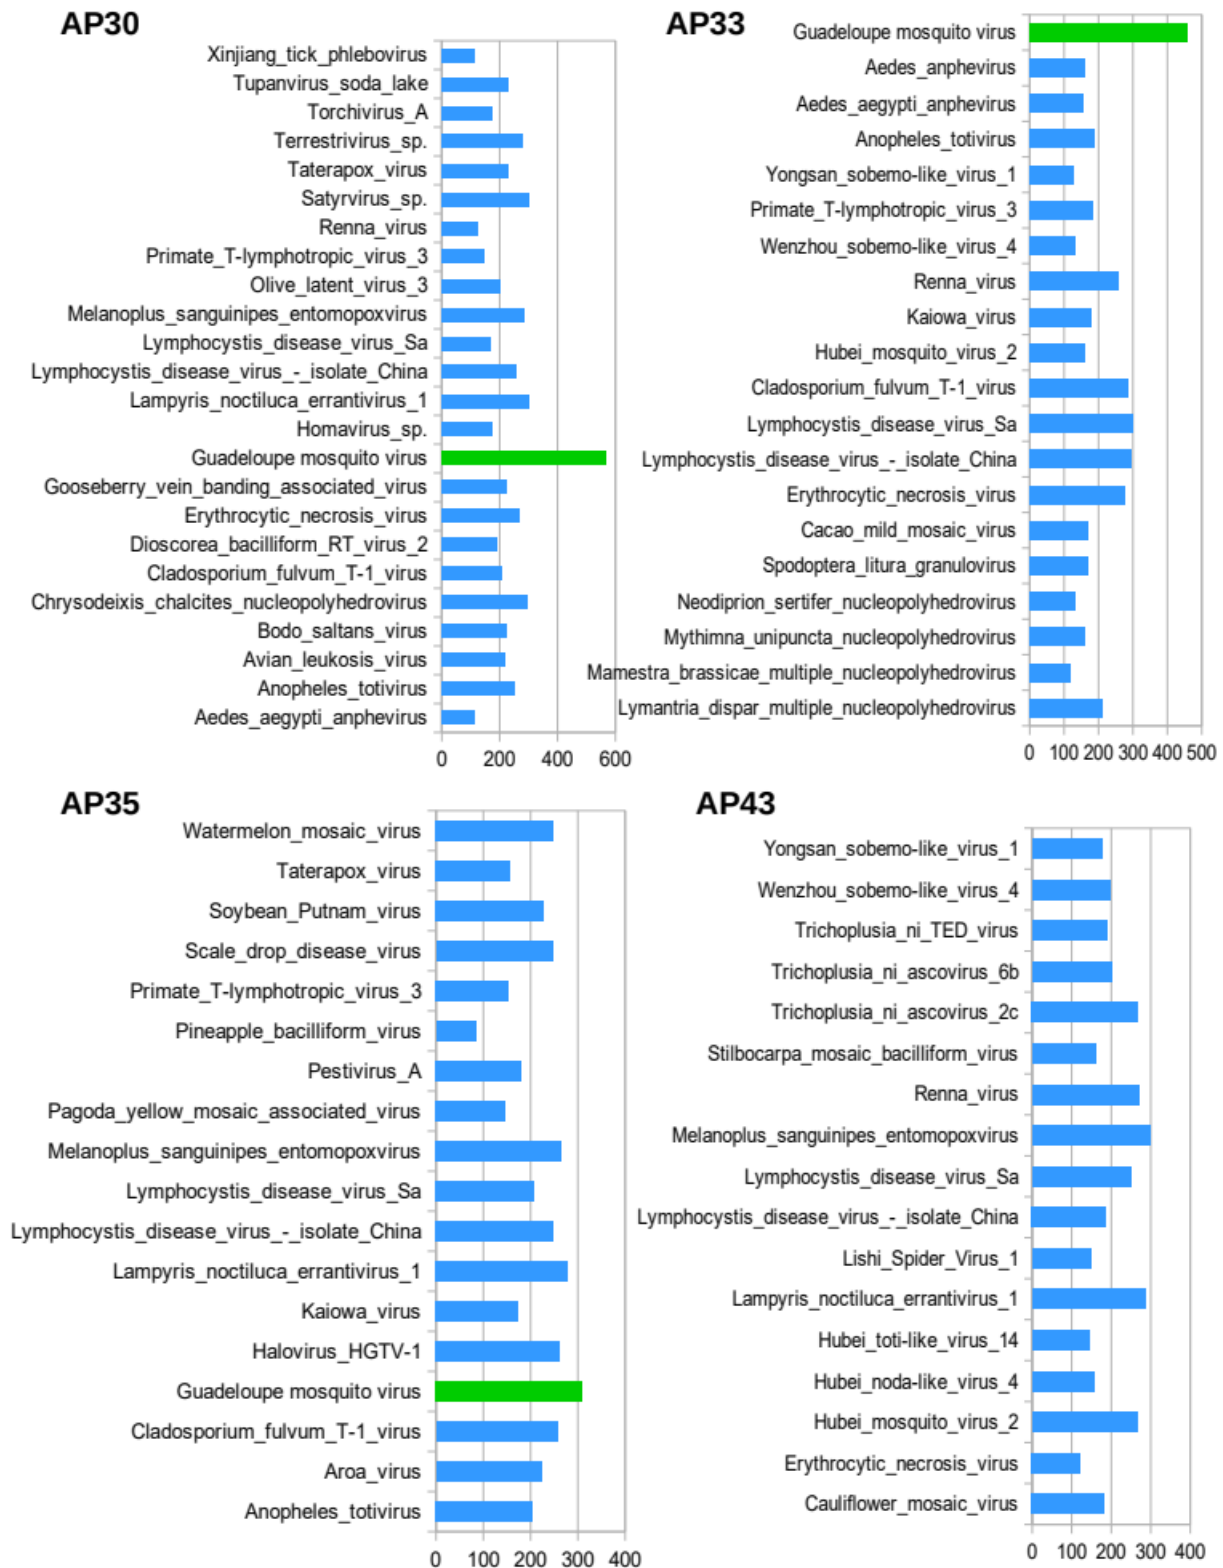

FIGURE S7

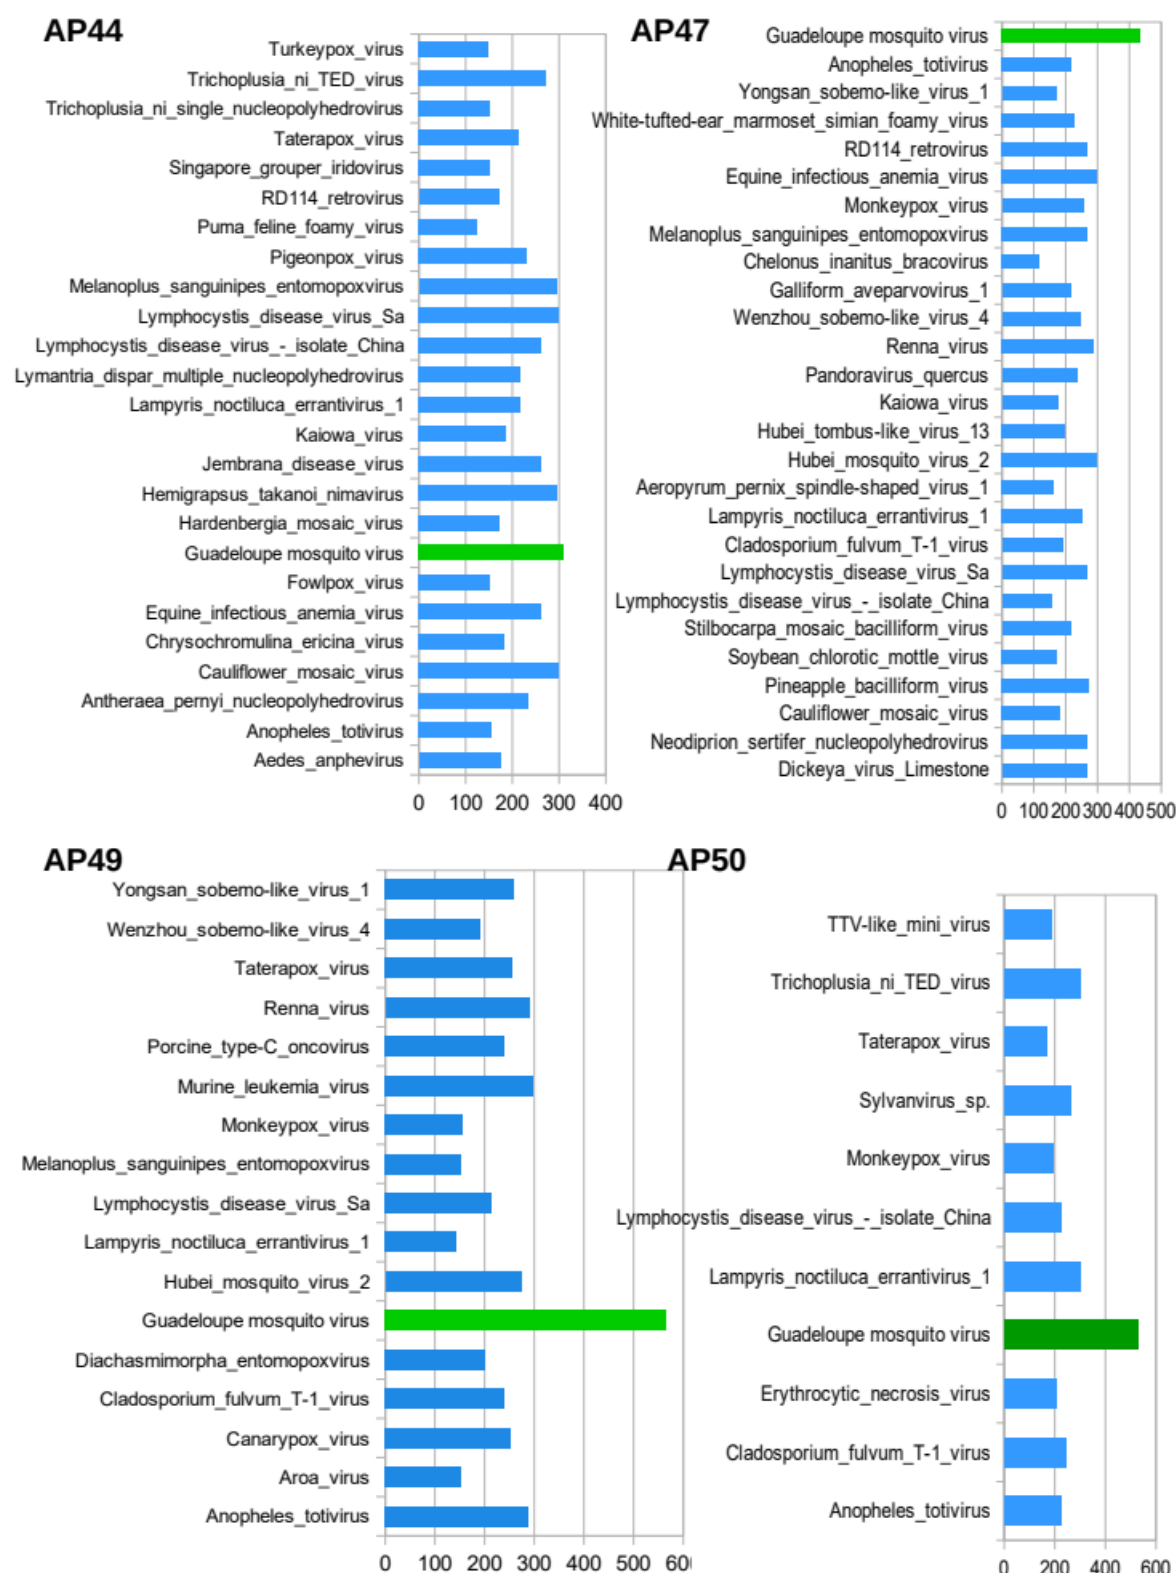

FIGURE s8

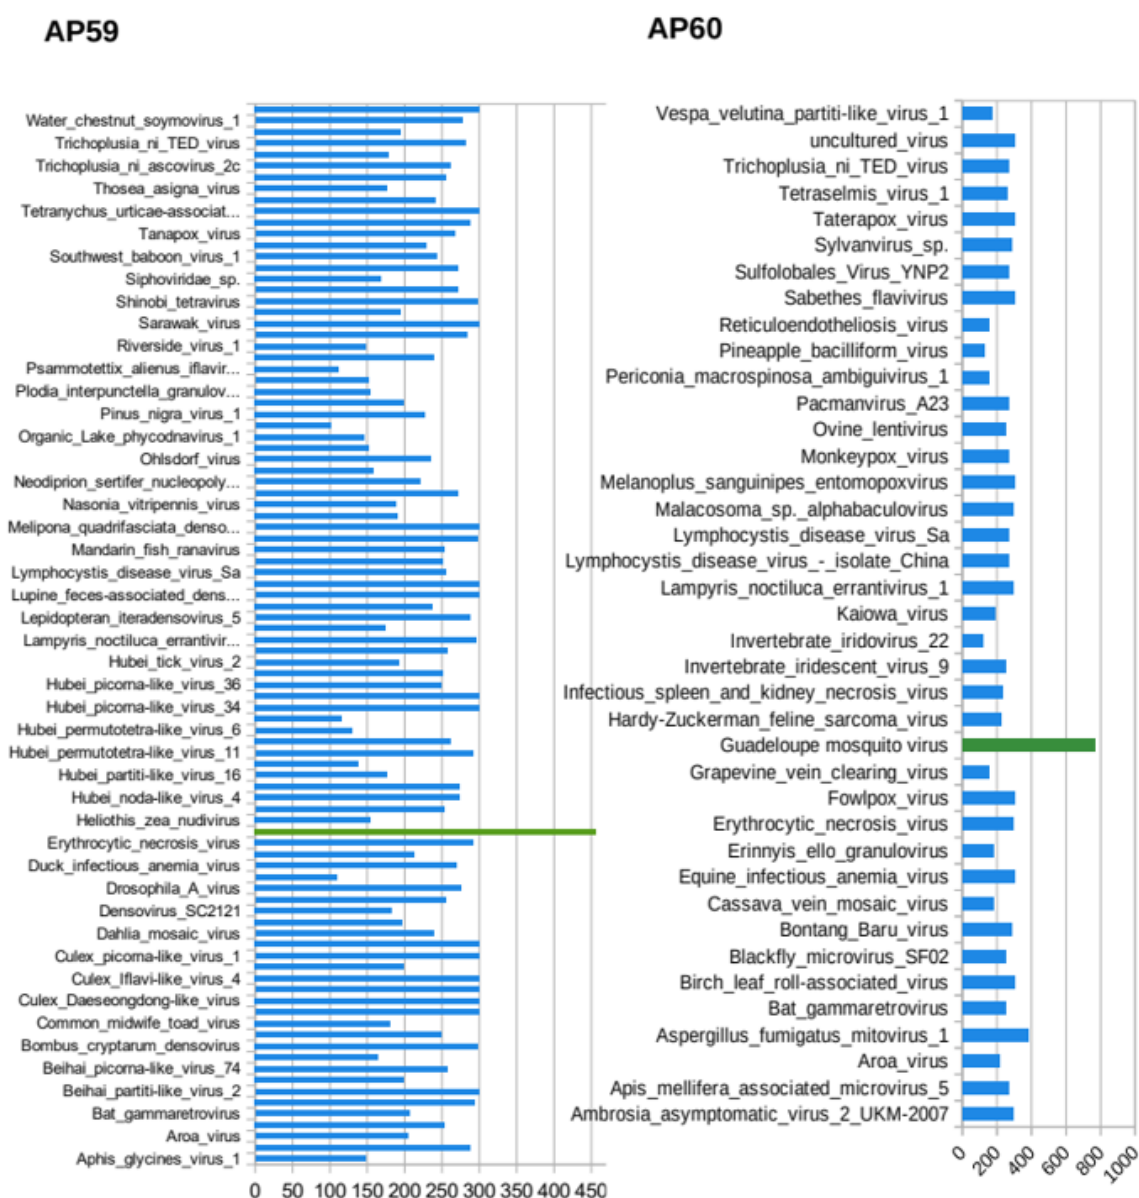

**Figures S4-S8.** Virome composition of *Aedes* mosquitoes. On the y-axis horizontal bars indicate all viruses detected in the pools of mosquitoes collected in Amapa. On the x-axis the number of contigs of each virus found in each library is shown. The green bars indicate the number of contigs of the Guadeloupe virus detected in the libraries. Data was generated using the next generation sequencing of fecal samples (see the main text for details.).

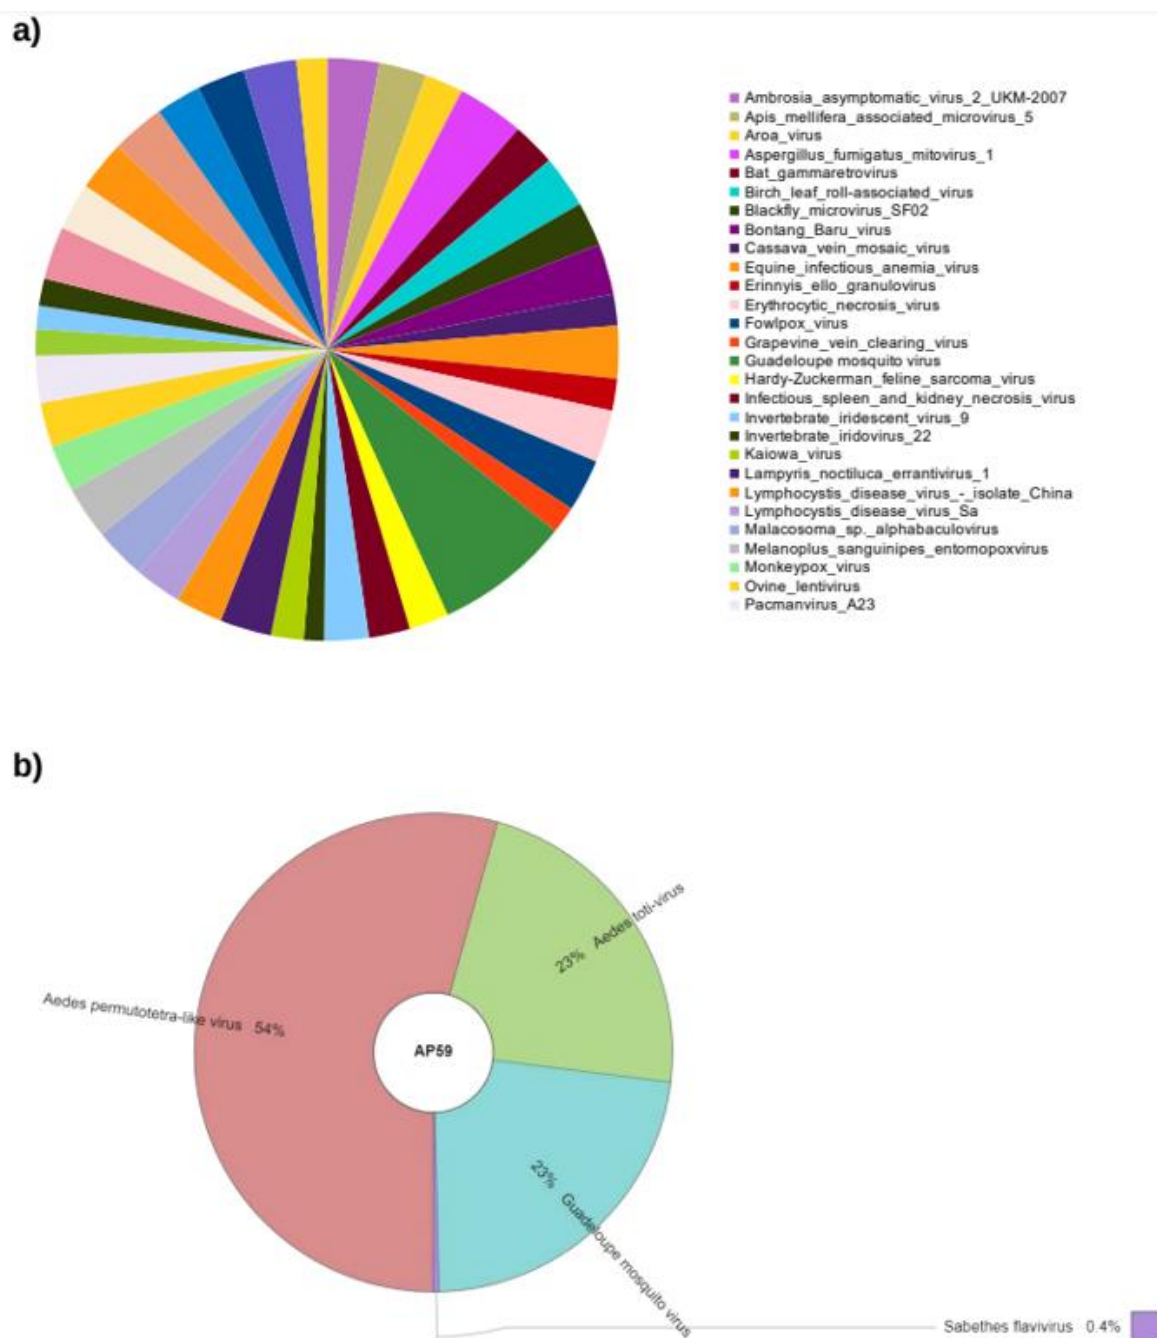

**Figure S9.** Comparison of viral richness of pool AP59 of *Aedes* mosquitoes. **(A)** Viruses detected by our pipeline (described in the main text), with the size of each area corresponding to the maximum size of contigs of a certain virus. **(B)** Viral composition determined by KRAKEN software, using adaptable *k*-mers as implemented in the Galaxy web server (<https://usegalaxy.org/>)

**Table S1.** Characteristics of pool samples of *Aedes aegypti* from Macapa.

| Sample ID | Location in the Amapa city | Week of sampling in 2017 | Intestinal content of females | Number of insects/pool |
|-----------|----------------------------|--------------------------|-------------------------------|------------------------|
| 1         | Central                    | 44                       | empty                         | 1                      |
| 2         | Marabaixo                  | 44                       | empty                         | 1                      |
| 3         | Marabaixo                  | 30                       | full                          | 1                      |
| 4         | Marabaixo                  | 30                       | empty                         | 2                      |
| 5         | Marabaixo                  | 18                       | empty                         | 1                      |
| 6         | Marabaixo                  | 18                       | empty                         | 1                      |
| 7         | Marabaixo                  | 18                       | full                          | 2                      |
| 8         | Marabaixo                  | 18                       | empty                         | 1                      |
| 9         | Marabaixo                  | 18                       | full                          | 1                      |
| 10        | Marabaixo                  | 18                       | empty                         | 3                      |
| 11        | Marabaixo                  | 18                       | full                          | 1                      |
| 12        | Marabaixo                  | 18                       | empty                         | 1                      |
| 13        | Marabaixo                  | 18                       | full                          | 1                      |
| 14        | Marabaixo                  | 34                       | empty                         | 2                      |
| 15        | Marabaixo                  | 34                       | empty                         | 1                      |
| 16        | Marabaixo                  | 34                       | empty                         | 2                      |
| 17        | Central                    | 34                       | full                          | 1                      |
| 18        | Central                    | 12                       | full                          | 2                      |
| 19        | Central                    | 12                       | empty                         | 1                      |
| 20        | Central                    | 12                       | full                          | 1                      |
| 21        | Marabaixo                  | 14                       | full                          | 1                      |
| 22        | Marabaixo                  | 14                       | empty                         | 1                      |
| 23        | Marabaixo                  | 14                       | empty                         | 1                      |
| 24        | Marabaixo                  | 14                       | empty                         | 1                      |
| 25        | Marabaixo                  | 14                       | empty                         | 2                      |
| 26        | Marabaixo                  | 14                       | full                          | 1                      |
| 27        | Marabaixo                  | 14                       | full                          | 2                      |
| 28        | Marabaixo                  | 24                       | full                          | 3                      |
| 29        | Marabaixo                  | 24                       | empty                         | 1                      |
| 30        | Central                    | 24                       | empty                         | 1                      |
| 31        | Central                    | 24                       | empty                         | 2                      |
| 32        | Marabaixo                  | 16                       | full                          | 3                      |
| 33        | Marabaixo                  | 16                       | full                          | 1                      |
| 34        | Marabaixo                  | 16                       | empty                         | 1                      |
| 35        | Marabaixo                  | 16                       | empty                         | 1                      |
| 36        | Central                    | 14                       | full                          | 1                      |
| 37        | Marabaixo                  | 46                       | empty                         | 1                      |
| 38        | Marabaixo                  | 32                       | empty                         | 2                      |
| 39        | Central                    | 32                       | empty                         | 1                      |
| 40        | Central                    | 32                       | empty                         | 1                      |
| 41        | Marabaixo                  | 28                       | full                          | 1                      |
| 42        | Central                    | 28                       | empty                         | 1                      |
| 43        | Central                    | 28                       | empty                         | 1                      |
| 44        | Central                    | 28                       | empty                         | 1                      |
| 45        | Marabaixo                  | 28                       | empty                         | 1                      |
| 46        | Central                    | 28                       | full                          | 1                      |
| 47        | Marabaixo                  | 28                       | full                          | 1                      |
| 48        | Central                    | 36                       | full                          | 1                      |
| 49        | Central                    | 52                       | full                          | 1                      |
| 50        | Central                    | 52                       | full                          | 1                      |
| 51        | Central                    | 26                       | empty                         | 2                      |
| 52        | Central                    | 26                       | empty                         | 5                      |
| 53        | Central                    | 22                       | empty                         | 2                      |
| 54        | Central                    | 22                       | full                          | 1                      |
| 55        | Central                    | 22                       | empty                         | 1                      |
| 56        | Central                    | 22                       | empty                         | 2                      |
| 57        | Marabaixo                  | 22                       | empty                         | 2                      |
| 58        | Central                    | 22                       | full                          | 1                      |
| 59        | Marabaixo                  | 22                       | empty                         | 1                      |
| 60        | Marabaixo                  | 22                       | full                          | 1                      |
