# Supplementary material for: Aedes aegypti from Amazon Basin Harbor High Diversity of Novel Viral Species
Source: MDPI journal article supplement (doi:10.3390/v12080866), 2020-08-08
Supplement: s1 [file s1]

> Aedes\_sombemo-like\_virus\_strain\_AP60-1\_MT808055

GAGTTTCTGAGTTATCTTCTCCGGATCTCTGCAAACCTGCATAATCTCTAAATGTCGTTAACCC  
TTTTAACAAGACGATGGTTATACTAGCAAACCTCCTGCTCTTTACGGTATTTGTGAAACGGA  
TTGCATCGTGGACACAAGACACTATGATATCCATAGTGTCTTGTGTCCACGATACAATCCGTT  
TCACAAATACCGTAAAGAGCAGGAGGTTTGTCTAGTATAACCATCGTCTTGTAAAAGGGTTT  
AACGACATTTGGGAGATGTTATTACCAAAGCTATCATTATGGTCCCTGCTCTTTACGGTATTT  
GTGAAACGGATTGTATCGTGGACACAAGACACTATGGATATCATAGTGTCTTGTGTCCACGA  
TACAATCCGTTTTCACAAATACCGTAAAGAGCAGGAGGTTTGTCTAGTATAACCATCGTCTTGT  
TAAAAGGGTTAACGACATTTAGAGATGTTATTACCAAAGCTATCATTATGGTCACCTGTAGAT  
GGATGAGCCAATCTCCTTGGAAGAATTCTTGCACCTTTCCAGGCGCCTCACTCGATTCCATG  
GTTAGCATGAGTGAAAGGAGTAACTTACCATGTCGTGGGCCAGTGTTTCTGGGTAGATGGG  
GCCTGGTTACAGCCGCTCACGTCATAGAAGGGTTTGAGTATCTTAGCATTTACCGGGACGAT  
CAACGCCGGATTGAGGTCAGTTCGGATGTGTTTGTCTATAGGACATGGAGATTATGCAGTTTG  
CAGAGATCCGGAGAAGATAACTCAGAAACTCGGCTTATCTAAAGCCAAACTTTTCGAGATTA  
GCAGTAAGTAAAGACAGTGGTCTTAGTGTAACGTCACGGCCAACCATCAAAGAACCATTG  
GGTTCTTGGAACAGCATGCCCAATTTGGGTTTGTTAAGTATACAGGCAGCACCGCTAAAGG  
TTTTAGTGGAGCGCCGTATCATTTTGGCAGGACGGTCTTTGGAATGCACTTGGGCGCTGATG  
CCTATAATATGGGTTACGATGCTGCTTTCCTCAAGTCAGAGCTGAAGCCGAGTCGTGTGATT  
AAAGATATAACAGGAATGAGAGGCGAGGATAGTATAGATTGGCTGTATGACCAATTGGAAA  
GATATGATGCTTTTCTGACCTCCCTGAGGCCGTATAACCCAGTGATGTCAGAAAGGAATTGG  
CAAAGGAGAAAGACCCCGTTGTGGCTATGGACGAAAGGGTTGTTGAACGAGTGGGGTAGA  
ACATCAATCTACCAGAATGAGTCGTTAGGCGTTGAGGATTTACCCCTAGCACACGGAATGC  
TATGAGCTTTAAGGATCAGGGAAACTTGATCAGGGCTCCAGCTGCCGTTGCTGGGGCCCAT  
GGTATGGAGAATGTCCAGGAAGCTGCTCCGAGCCAAAACGGGCAAACATTGCCCCAAATG  
GCTTGACATCCCAGACACCTTCGGTTCCTTACCATATGGAATCCCTTTCGTGACGCTTGC  
TCAGCCAAACGTAGTTTCCGCGCGCACTGCAAGAAACAGGCAGAGACGGTTAAACCGCCA  
ACGGCAGAGGAACGAACCTCGCGCTGTACAAACAGCAATACGGTCCTATGCCCCATGGCGAT  
ATGACCTCACCTCCGCCGAGATCCCCATAGCTGGTTCGATTGTGAATTCAACAAGGCCTTT  
AATGGAGATAGATTTAAACAGTACCCAGGGTATTGCAGTCTTACTCTCTTAGGCTCTACGA  
ACAAGCAGATTTTAGGATGGGATGGGATCAATTTTGATCCCGATCGAGTTACCATAGTCAGG  
CAGCATGTGAAGTTCCGTTTCGATAAGCTCCTTGAGGGGATACCAGTTTACGATGACCTTAA  
GGTTTTCGTTAAACAGGAACCCCAAGTTGAAGAACTCGAGGATGGGATCCTATCGCCA  
GATCTATCAAGACAGCTTCACCGCCCCGTTACCGACAGCGATTTTGTATAGCTTATCTACCC  
CCCGCTCTACTGGCGTCAGTAGGACAGACTCCGTGTTTAGTCGGATGGAGTCCAGTACGAG  
GAGGGTGGAGAGCTATACAAAATCGCTTCGGTAACGGGGCGGTGAACTGTCTTGATAGATC  
TGCATGGGATTGGACGGTACAGGGATACTTGGTAGATCTGTGGATTTTGTCTTGAAAATT  
TGCCAGTCAATCCTCCTGAGTGGTGGCTAGCCATGATGAAACTTCGGTTCAAGCTACTATTT  
GAGGATGCTTGGTTCAAGTTCGAGGATGGAACAAGAGTGAAACAAGGGACTAGAGGTGTA  
ATGAAGAGTGGGTGTTACCTAACTATTTTGTGAATAGTTTGAGTAACAAGCACTGCTTCAT  
TAGATAACCACTGCCTGGACCGTGTCATCACCTATTCATAGGTGATGACACTGGTCCAGGAG  
GCCTTATGACATGGTCTAGCCGGCATTATTGGCTACCGGATTATGTCCGCCAATTGGAAATTT  
TGGGAGTCACGGTCAAGGGTGCCAAAGTTCAGCACTGGGTAGAATTTGCCGGCTTTTGT  
TGATGGAAAACTTGTTATCCGTCGTACTGGCAGAAACACCTGTTTAATCTTGCGCATAACGC  
AGCGTCTTGGGGAGACGCTAGCTAGTTATCAATATTTGTACGTCAATGAGCCCGTGATGTAC  
GAATTTCTCTGCAGAGTGGCTCGTGAATTAGGTCCTCAGTATGTTTTGCCTAAGATGGAAGC  
ACTAGACATAATGAACCAGCCTGTTTGGGTGGAATATGTCAAGTTCCCTTTCGTCTTGAGG  
CAATTCCTATTGAGATGAGTTGGCTATTTATGATTTCCAGCCTGTTTAGGTTGGAATATGTCA  
AGTTCCCTTTCGTATGGAGGCATTCCTATTGATGACTAGAAAGGGAACCTTGACATATTCC

AACCTAGACAGGCTGGTKYWYRTGTACGTCAATGAGCCCGTGATGTACGAATTTCTCTGCA  
GAGTGGCTCGTGAATTAGGTCCTCAGTATGTCTAGCCT

>Aedes\_sombemo-like\_virus\_strain\_AP60-2\_MT808056

AAAAAAAAAATCTATCTACAGGTGACCATAATGATAGCTTTGGTAATAACATCTCTAAATGTC  
GTTAACCCTTTTAAACAAGACGATGGTTATACTAGCAAACCTCCTGCTCTTTACGGTATTTGTG  
AAACGGATTGTATCGTGGACACAAGACACTATGATATCCATAGTGTATTGGACTTATAGAAA  
GGCACAACGATGCTATGTGTTTCTCTCGACCTACCAATCCACTGGAAAGTGGCCTATTTGGT  
TGGACACTGAGAAAATCATGGCGTTGACTATTTGTGCTTTTATAATTGTCATTTTTCACGTACA  
AGGCTGTGCAGTACTATAGAAGCAGGAGGATTAAGATAGTCTGGCCAACGGAAACAAAAA  
CAGGCGGATATGGCAGTGAGAAAGCCATGTGTGGCAGTTCCTTTGATATCGCCAAAGTCTT  
GCCTTCGTTCCAGGCTACAGTGTTAGCTTCTCTTGATGGAGTAACTTACCATGTCTGCGGGCC  
AGTGTTTCTGGGTAGATGAGGGCCTGGTTACAGCCGCTCACGTCATAGAAGGGTTTGAGTA  
TCTTAGCATTTACCGGGACGATCAACGCCGGATTGAGGTCAGTTCGGATGTGTTTGGCATCG  
GAAATGGAGATTATGCAGTATGCCGCCATCCGGAGAAGATAACTCAGAACTCGGCTTATCT  
AAAGCCAAACTTTTCGAGATTAGCAGTAAGTAAAGACAGTGGTCTTAGTGTAACGTCACGG  
CCAACCATCAAAGAACCATTGGGTTCCTGGAACAGCATGCCCAATTTGGGTTTGTAAAGTAT  
ACAGGCAGCACCGCTAAAGGTTTTAGTGGAGCGCCGTATCATTTTGGCAGGACGGTCTTTG  
GAATGCACTTGGGCGCTGATGCCTATAATATGGGTACGATGCTGCTTTCCTCAAGTCAGAG  
CTGAAGCCGAGTCGTGTGATTAAAGATATAACAGGAATGAGAGGCGAGGATAGTATAGATT  
GGCTGTATGACCAATTGGAAGATATGATGATTTGGAATACTCCCGTTCACCGTATAACCCTG  
ACGAGTACAGAGTCCGGATTGGAGGTAATTATCATATTGTTGATGAAGAAGTTTTTGAGTAGT  
TTGCTTCAAAGGCGAGCTGGCAAGAAAGCGTCTCAGGATATTGATTATCTCCAGAAACAG  
CCTTTTCTGACGGACGTGAGTCAGTAGACTCTAGTGATGTCAGAAAGGAATTGGCAAAGGA  
GAAAGACCCCGTTGTGGCTATGACGAAAGGGTTGTTGAACGAGTGGGGTAGAACATCAAT  
CTACCAGAATGAGTCGTTAGGCGTTGAGGATTTACCTTTAGCGCCTAGGAATGCCATGACGT  
TTAATGATTCGGAAAACCTGATCAGGGCTCCAGCTGTAGTTGTTGGGGCCCGTGGCATGGA  
GGAATATCAGAGGGGAAAGTGTACAGAGCCACGACTTGCCAAGATGCAAGAAAATGGATTG  
CATGTGCCAGAAACCTTTGGAGACCTACCATATGGAATCCCTTTCGTCGACGCTTGCTCAGC  
CAAACGTAGTTTCCGCGCGCACTGCAAGAAACAGGCAGAGACGGTTAAACCGCCAACGGC  
AGAGGAACGAACTCGCGCTGTACAAACAGCAATACGGTCCCTATGCCCCATGGCGATATGAC  
CTCACCTCCGCCGAGATCCCCATAGCTGGTTCGATTGTGAATTCAACAAGGCCTTAAACGA  
GATAGAGTTAAACAGTACCCCAGGGTATTGTAGTCTTATTCTTTTAGGCTCTACGAACAAGC  
AGATTTTAGGATGGGATGGGATCAATTTTGATCCCGATCGAGTTACCATAGTCAGGCAGCAT  
GTGAAGTTCCGTTTCGATAAGCTCCTTGAGGGGATACCAGTTTACGATGACCTTAAGGTTTT  
TGTTAAACAGGAACCCCAACAAGTTGAAGAACTCGAGGATGGGACCTATCGCCTGATAAGT  
GCTGTCAGCCTGATAGATACTTTCATAGACAGAATTTTGTTTCGCTTGGTTAGCCCGAGCTCA  
ACTGGCTTCAGTAGGACAGACTCCGTGTTTAGTCGGATGGAGCCCAGTACGAGGAGGGTG  
GAGAGCTATACAAAATCGCTTCGGTAACGGGGCGGTGAACTGTCTTGATAGATCTGCATGG  
GATTGGACGGTACAGGGATACTTGGTAGATCTGTGGATTTTGTTCCTTGAAAATTTGCCAGT  
CAATCCTCCTGAGTGGTGGCTAGCCATGATGAAACTTCGGTTTAAGCTACTCTTTGAGGATG  
CTTGGTTCAAGTTCGAGGATGGAACAAGAGTGAAACAAGGGACTAGAGGTGTAATGAAGA  
GTGGGTGTTACCTAACTATTTTGTGTAATAGTTTGAGCCAAAGCCTGCTCCATTACATAGCA  
AATGCCCCGTTGCGGACAACCCATGGCTAGGAAACAACCCAATTCCATAGGTGATGACACGG  
TCCAGGAGGCCTTAGAATGGCTACCGGATTATGTCCGCCAATTGGAAATTTTGGGAGTCACG  
GTCAAGGGTGCCAAAGTTCAGCACTGGGTAGAATTTGCCGGCTTTTGTTCCTTGATGGAAAAA  
CTTGTTATCCGTCGTACTGGCAGAAACACCTGTTTAATCTTGCGCATACGCAGCGTCTTGGG  
GAGACGCTAGCTAGTTATCAATATTTGTACGTCAATGAGCCCGTGATGTACGAATTTCTCTGC  
AGAGTGGCTCGTGAATTAGGTCCTCAGTATGTTTTGCCTAAGATGGAAGCACTAGACATA

>Aedes\_Iflavi-like\_virus\_1\_capsid\_MT808057

TTTTTCGTTCTTGTCTGTTGTTGAAAACGTTCTTTGTGTGTTTGAAGATTGAGATAGAATAA  
CACTAGTGTATAAGAGACAAAAAAGTAGTTTCAAAGAGAACAACAAGAAAGAGACGCTAA  
CTATAGAATGTATATTTTAAATCAAATACATTTGATCGTTAGCGTCTCTTTCTTGTTTTGTTTT  
TGAACCTATTGTATTCTATATTCAAACGCAGTTATAGTATAACTACGGTAGAAGAGACAATAC  
AAGAGTTTCAAAGAGACAACAAGAAAGAGACGCTAACGATCAAATGTATTTGATTAACAA  
TATACAGTTGATAAATTGGACAAGAGTATGGAGGTACTTAAGAAGGCGGTTGTCTAGGAGC  
CGCCTCCATACTCTCTATACTAGTGGTGTCCGTAATTATCTTGCTTCCAATCGCTTTTATGCGT  
ATAGGCAGACGGAGAGCAACTATGGAGGAACCTACTGCATCACCATCACCTTGCGTACCCG  
AGACGGCTCACGACAACCTTCTTTTTGTAAGAAGAGAAGGGAATTCGAAACGTAATATCTTT  
GAGGATGGGTACAAAGAGGTATTTCAGTATCTGATGAGTTGGAAGCCACAAGGATTGGATA  
GTAATCAACAGACCCCACTGGCTATTAGTACAGATGAAAATGTTGAGGTGTCAGATAAAAA  
GGAAAATGTTATTATTGAAGGAGCAGAAACCCGAGAGACTAAAGAAGCTAAAGTGAACCT  
AGATCACAATTTAATTAATTGGTCAACCACAGAAGGCACTTATGACTTCACAGAAGGGGAG  
GGATCTATTATGGCTAGGTGGATGCCTCTTAGTAGTGTAGAGGTGAACCAGACTATTGCTACT  
AGAGCCCCAATTTGGCAAGCAAAAATAATAGAAGACATAGCAGCGTTGAAGAATATTAATG  
TACTTCCAATGCGTGGATTTATGCTTGGAAAATTTGATGTGGAGTTTAAATTGGTTTTACAAG  
CCACTCCTTTCCAGGCTTGTAGTCTGTTGCTATCATGGTGTCCCCATCCATATGGGTTGATGC  
AGTACAATGCCATGGTTGGAACAGAGGCATTGGAGGCTACTAAATTGAATCAAAGACTTCC  
AAAGTATGTACCATTTTCGAGATTATTTAGATGTTACAACCTGCCGTACAGCGACCAAACGTTAT  
TTTGGATGTGGCTTCAGGAGGAGAAGCTGTGTTGCGAGTGGGGCAAAAATTTACCGGTACA  
TTCATTTCGCAACTTTGATTTTGACCGAGTCACTGGAGTGAATATGGGCATTTCGAGGGGGATA  
TCAAGGATTGTTGTTGTTACATCAGTTGACTCCAGTGATGGTTGGTAACGGAACACAATCAT  
CATTTACTGCACGCATTTTCTATCGTTTTGTAGAAGCAAAATTGACTGCAATGACTCAACCA  
GTGGAAGCCCGGACTAAAGTGGAATTACCATACATGTATGTAATTCCAAAAAATGAAGACG  
CAAAATTTACCGAGATGAGTTCAGTAGCTGCCGAAGAGCAAAAGAGAACGATACTACGTAC  
TAAATAGCGAACGCAAGGGCCGGCTATGGGTGCACTTTCCTTGATAAGGGGAGTAGGAATG  
ACAGCTACAGGATTAATAGCTTCAGTAGAAGCTGTCTCTATGATACGAGGCACGAGACCAC  
GAAATCGAGATAAACCCAATGATATAGTAGGACAAGTTGTTGTTTCTCCCCGACCTAGACCA  
AATTTTACCAATGGGGAAGGAATTGATGGAGCTGCTGTTATTGGATTGAGTTTTTCGGAACCT  
GACAAATGTTTTGGAAAGTTTTAGTGATGAACCAACATCGTATAAGGATTTTCGTAAACATAA  
ATGGTTTGCTCACAACATTTGAGTGGAACACAGGTGATGCTGTGGGTTCAAACCTTATGGGT  
GTGGAATGGACATCCAACGGATTCTGGGAAGGCACTCACAGAAGACCAAATTGCCACAGG  
AGGTTTTTCCGTTAATCAATTATTTACGCCCTTGTC AATTGCATCATCCGGTTTTACTAATTAT  
GCAGGTACAATAAAATTGTATTTTCAATTTGTAAAAACAATATTCCATAAAGGAGCTGTGGA  
GGTTTCAATCCAGTACGGACGGGAGCTAGTGGATAATGCTCTGGAGAATTCGTATGTAAAAG  
TTATTAATTTGCAAGATTGTGCTGGGTTCGAAATGGTTTTCCCATATATTTATGACACACCGAT  
GCGGTCAATTACGGGAACATCTACTCCAAGCTTTTTACCTTCAGTGGCTACTTCAGATATATC  
GGCAATGGTCCACAGTGCCAGAATAACAGTGCGCGTCCTTAACCGTTTAGTGGCACCGGAT  
ACAGTTGCGAACTATGTCCAAATGTTAGTTTGGATGAAAGGAGGAGAGGATTTTCGTCTTGA  
GTTTTCTAGGCCATATAACACCACACTCGCGTATCCCCTGGCAATGGATTTTATCCCCCAC  
AAATTATTCATATAGTGTTGGCGCCACAGTACCAGAATAACAGTGCGCGTCCTTAACCGTT  
TAGTGGCACCGGATACAGTTGCGAA

>Aedes\_Iflavi-like\_virus\_1\_helicase\_MT808058

AGAAGTTAAGTCTATTGCAGTGCAAGAGATACATGATATGGTTGGGCGACTATTCCCCAAAA  
TGACCCAAGTTAAGGAAGTATCATCATCAGTCTGGCAAATAGCGCAACACTTGGTGATGT  
GGCACTGGCAAAACAATGGAAAACGGCGGCGTGGGCTAGCTTTTGTATTATGCAAGAGCTA

GACCTAATAAAGTTGGCGCAATGGAATCGAGTAAAGGAACCCCTTATTGGCTCTATTTTCAGCA  
GACAGAACAATTCCCACTCAGGGACCAGATATGGGTACTTGGACTGCGTTAATGCAAGTG  
TTAACAGCCGTGGTTTTCGCTAGATTGCAGGTGAAGGCAGACCACGGAATAAGGGCCCATC  
TATTGAAAATATTTTCCTCAAACGATTATAGGTCAGTGACTGGCATTAACTCTGTACTTCTGT  
TGGTACGTAGTATAATGACATCTGTGTCTACTTTGGTGACGTGGGCAACTAAGGAGAGAGAT  
CCCAATATAGAGCTCCTGCAATCGCTACAGAATCAAGGTGGAGAGTTGTATGAATTTGTTCA  
GGATGCTAATGTGTTTCCTTACACACTTCTCAGAGTGTGACTTTGCCAAGCGAGAGGGTCGTA  
TTCGACATTTGGCAACTATATTGCGAGCGGTTAAAATAAGAGAGATGCTGTTACGAATTGGA  
CAACCCAATGTAAGTGGACCTGTTTTGTCTTTGTGTACAAAGGTAATAGACAAGGCTGCTAA  
ATGTCAATATTTGATGAAATGTGACGTAGTTAAAATGGAACCATATGTGTTTTATTTGTCTGGG  
AGCACCTAAATGTGGGAAAAGTTTTCTAATGTATGATATAGTTCCCCATTTGTTTAAGAGTAT  
TGGGATAAATCCTCCAACAGTTGACTTCATGTATACAGTTACTGCTGGCGTGGATTATTGTAA  
TGGATTGAGGTCTGATCACTTGGCTTGGTTGTTTGATGACGCCTGGAATTTGCTTGATGAGG  
AATCTTTCCGTAAATTGGCACAGTTCTTCTATGGCTTGGTAACTTCAGCACCATTTAATGCTC  
CCCGAGCTGAATTGGAGCATAAAGAACAATTGGCCCAACCTGTAGTAGTGGCCGTGGCTAC  
TAACAATGCATTTCCCCGCCATAACATGATGGCGTGCCATTTGGCCATATGGAGGCGGAGGA  
ATTGCTTGTGGTATGTGCAAACTAAAGGGAATCGACCCATTAGTGAATTCTCTAAGGAACAG  
TTGGCCGCATTTGACCACGTGGAATTCTACCGGTATGGGAATGTTTGTGATGAAAACCTCTCG  
GTTAGAACAAGTGTATACATACACAGAGTTTCTGCAGTGGTTAACAGAGGATTTTAAGAAA  
CATCATGAACAGGAAAAGGGCAATCAACAAAGCAAATATCGTAGCTTGACAAAGTGCTTGA  
GTGGGAGCGCATTAGATGATTTGAGTTTGGAGAACCCATT

>Aedes\_Iflavi-like\_virus\_1\_Rdrp\_MT808059

AGGTATGAGTTTGTGGAATTGGAAGGTGACCCTTATGTGGCGGAAGATTTCCAGGCCCAA  
GATGACTGTGTGTATGATGTGGATATGCGAATTGAAGCAGTGATGAAGCACAGCACCGCATT  
TGATGATGATAACGTGGAACATGAAAATGAGAATGGAGTGATGTATAATTATCAAGCACAG  
GAATGTGTGGAAGTTTGGTGTGCATTAATTCTAATCAACCCATTGTATCGATGCACATAAGTG  
GTAGTGCTGCACAAAATAAAGGGATTGGATGTATATTATATCAGGATGACTTTGAAACTCAA  
GGTATGAGTTTGTGGAATTGGAAGGTGACCCTTATGTGGCGGAAGATTTCCAGGCGCAAG  
TGATTGGATTTGTAGACCGAGATCAAAGCGTTTTTCATACCAAATAAAACAACGATTAGACCT  
TCATTAATAGATAAATTTTATACTGAACCTACAAAAACTATTCCAGCATTTTTATCTAAGGATA  
ATCCAGGATACCCACATCAGTTTGGTCCACTACATTATGGGGTTTTAAAAAATGGCAAACCA  
AGCGCAGATTTTCCAGCCGATTGGTTGAGAAAGCATAACAGTTTTGTTCGGTCTCGTGTGTT  
ATCAGGGGAAAAAGGACCATTCCCCTACCGCATATTAAGTATGGAAGAGAGTATAATGGGGT  
ATGGTATTCGTTATGAAGGAATGGACCCAGAAGAGGATGCATACATGGGGATGATGGAACATA  
GATACAAGTGCAGGGTGGCCCTATTCCACAGTGGCAATCAGAAAGAAATTTGGAATTACAG  
AGCTCAATAAGAAGCAGTGGATTAAGGTTGAGTTTGGAGAAAACCAGTTACCACAGCAATG  
TTGGGTGCATGGTTATGTTAGAGAACAACATGAAAGTAATATGGAGAAGCGTGAACGAGGT  
TTATCTGTCTTTAATGTGTTCCAAGACTGTTTGAAGGATGAGCGCAGAAAGAGAGGAAAAG  
CCATGCAACCAGGTGGTACTCGGCTTTTTTCTATTGCTAATATTGAAGGAACCTATTGCTCTGC  
GAAGGTACACTTTATCATTGGTAAGCCATTTGAGGTACAATAGGATTAAGAAGTCTATTGGG  
ATAGGGATTAATCCAGACTCCATGGAGTGGACGACATTGTATTGCGCCTTAATAAAGCAGGG  
ACGTTCTAAATTCTTTACTACTGACTTTACAAATTTTGGGGCAGGGCTCAACTATTATGTGGG  
TATGAAATTTGCAGATTTGATTTTGGATTTTATGAGCCAATTTGGTATGGAGAGACGGAGTGT  
GGACTTGAATGTGGTAGAGGCGTTGATAACGGAATTGATGGGTAGTTATCATGTAGCTGGAG  
ACATTGTATATCGGACTAGTAGTGGGAGCCCATCTGGAGCGGCTATAACTGGAGAAATAAAT  
AGTTTTGTACATTTGATGTATGTAAGTATTAGCTGGCTCATCATAGGCACAGTGGTGCACAGG  
TTGAAGTTTGTGAGAGAGTACAGGATACCCAGAGTTGGAGGCATATTTGTGTAAATTTG  
GTGTGCCCGCAGCTGGAATTTACTCTTGAAGATTTGAGCGCCAACACTACTATGGTGGTGTAT

GGTGACGATGGGATATTTTCTGTGTCAGAYGAATATGCAGAGTATTTCAATTCACAAACCATT  
AATCTAGTACTGAAGCAACACGGGATAGGTGTCACGGATGCTTCTAAACAGGAAGAGATTG  
TGAAGTATACTTCTCTGGAAGGTGTTCAATTTTTGAAACGAGGATTTAGAGAGGACAGTAAT  
TTTCCTAGTTGCATTCGACTCTCTGCAATGGATAAAGAACTATAGAAGAAGTGCCACGGTG  
GATTCATGTAAAACCTTTAACTCCTGAGGCGGCTACCCGGGAAAATTGTGAGGCGGCTTTG  
AACTTGATATGGGGGCGAGGAGAGAATGAATATAATGCACTGGCGAACAAGTTGAACCGGT  
TTTTGCGGGAGATAGGGTTGCAACCAATTTTGAT

>Aedes\_Iflavi-like\_virus\_2\_capsid\_MT808060

TTGTCAAAAACCAAGGATGATGTTTAGAAAAATGGGTAACAAATAGTGAAAGTGATATGGGA  
AAGTTCTTGGGGATGATTAGTGATGTTGTGTACCGCAGGACATACCTTATGTTTGAATTTTC  
CTTTTTTCTCTCTTCCACACAAAGTGTAACAATGCAAACATGGTATTGGCCTGCGGTACA  
CCAAATCGCTACTCCTCCACTAGTAGTTCGACTACCACACCTACCACACCGTAGCGTCTTAT  
TTTCCAAAACCGAGAAACATTCTTGATTAAATTTCCAATGCCCTGCGTTTTATTTTCTGGTG  
CAGATCGTTTCAGTGCCAATATTTTCTCCCGATCGATTTCAAAAGCAAACGCTGTACTTCC  
CATCCCAATAATTGCGTGACGGGTCTTATACTTCTTGCTGAAGTACACTCTGTTGAGAAT  
ACTCAAATGGGTCTCCAAACTCAAATCATCTAATGCGCTCCCAGCGTCAAGCACTTTGCAA  
GCTACGATATTTGCTTTGTTGGTTGCTCTTTTCTGTTTCATGGTGTTTCTGGTGCAGATCGTT  
TCAGTGCCAATGGATTCTACCGATGGATTTTGTGATGAAAACCTCTGTACTTCTTCAGCCAAC  
AAGTGTATACATACAGTAGCTTCTTCTGCAGTCACTCTGTTGAGAATATCAAATGGGTTCT  
CCAACTTAAATCATCTAATGCACTCCCACTCAAGCACTTTGTCAAGCTACGATATTTGCTTT  
GTTGTAGTGATAGAGGTGAACCAGACTATTGCTACTAGAGCCCCAATTTGGCAAGCAAAAAT  
AATAGAAGACATAGCAGCGTTGAAGAATATTAATGTACTTCCAATGCGTGGAATTTATGCTTG  
GAAAATTTGATGTGGAGTTTAAATTGGTTTTACAAGCCACTCCTTTCCAGGCTTGAGTCTG  
TTGCTATCATGGTGTCCCCATCCATATGGGTTGATGCAGTACAATGCCATGGTTGGAACAGA  
GGCATTGGAGGCTACTAAATTGAATCAAAGACTTCCAAAGTATGTACCATTTTCGAGATTATTT  
AGATGTTACAACCTGCCGTACAGCGACCAAACGTTATTTTGGATGTGGCTTCAGGAGGAGAA  
GCTGTGTTGCGAGTGGGCCAAAAATTTACCGTACATTCATTTCGCAACTTTGATTTTGACCG  
AGTCACTGGAGTGAATATGGGCATTCGAGGGGGATATCAAGGATTGTTGTTGTTACATCAGT  
TGACTCCAGTGATGGTTGGTAACGGAACACAATCATCATTTACTGCACGCATTTTCTATCGTT  
TTGTAGAAGCAAAATTGACTGCAATGACTCAACCAGTGGAAGCCCGGACTAAAGTGGAATT  
ACCATACATGTATGTAATTCAAAAAATGAAGACGCAAAATTTACCGAGATGAGTTCAGTAG  
CTGCCGAAGAGCAAAAGAGAACGATACTACGTACTAAATATCGTACGCAAGGGCCGGCTAT  
GAGTGCATTTTCCTTGATAAGGGGAGTAGGAATGACAGCTACAGGATTAATAGCTTCAGTA  
GAAGCTGTCTCTATGATACGAGGCACGAGACCACGAAATCGAGATAAACCCAATGATATAGT  
AGGACAAGTTGTTGTTTCTCCCCGACCTAGACCAAATTTTACCAATGGGGAAGGAATTGAT  
GGAGCTGCTGTTATTGGATTGAGTTTTTCGGAACCTGACAAATGTTTTGGAAAGTTTTAGTGA  
TGAACCAACATCGTATAAGGATTTTCGTTAACAGATGTACTTCCTTAACTTGGGTCATTTTGGG  
GAATAGTCGCCCAACCATATCATGTATCTTTGTGAGTTCAAGCGATACATGTAGTGTGTGGCG  
ACTATTCCCCAAAATGAACGAAGTTCAGGCAGTATCATCATCATGTCTCTTATACAAATCTTT  
AGCGGACGACGACCTACGCGGTGTGAAGATTGGGTGGAG

>Aedes\_Iflavi-like\_virus\_2\_rdrp\_MT808061

TTTTTCTATTGCTAATATTGAAGGAACCTATTGCTCTGCGAAGGTACACTTTATCATTGGTAA  
GCCATTTGAGGTACAATAGGATTAAGAACTCTATTGGGATAGGGATTAATCCAGACTCCATG  
GAGTGGACGACGTTGTATTGCGCCTTGATAAAGCAGGGACGTTCTAAATTCCTTACTACTGA  
CTTTACAAATTTTGGGGCAGGGCTCAACTATTATGTGGGTATGAAATTTGCAGATTTGATTTT  
GGATTTTATGAGCCAATTTGGTATGGAGAGACGGAGTGTGGACTTGAATGTGGTAGAGGCG  
TTGATAACGGAATTGATGGGTAGTTATCATGTAGCTGGAGACATTGTATATCGGACTAGTAGT

GGGAGCCCATCTGGAGCGGCTATAACTGGAGAAATAAATAGTTTTGTACATTTGATGTATGT  
AACTATTAGCTGGCTCATCATAGGCACAGTGGTGCACAGGTTGAACTTTGATGGAGAGAGT  
ACAGGATACCCAGAGTTGGAGGCATATTTGTGTAAAATTGGTGTGCCGCAGCTGGAAACGA  
ATATGCAGAGTTGGAGGCATATTTGTGTAAAATTGGTGTGCCACAGCTGGAATTTACTCTTG  
AAGATTTGGGCGCCAACACTACTATGGTGGTGTATGGTGACGATGGGATATTTTCAGTGTCA  
GACGAATATGCAGAGTATTTCAATTCACAAACCATTAACTGTACTGAAGCAACATGGGATA  
GGTGGCACGGATGCTTCTTAACAGGAACACTATTAATGGTTTGTGAATTGAAATACTCTGCA  
TATTCGTCTGACACTGAAAATATCCCATCGTCACCATAACACCACCATAGTAGTGTGGCGCTC  
AAATCTTCAAGAGTAAATTCCAGCTGCGGCACACCAATTTTACACAAATATGCCTCCAACCTC  
TGGGTATCCTGTACTCTCTCCATCAAAGTTCAACCTGTGCACCACTGTGCCTATGATGGAGC  
CAGCTAATAGGTACATACACCAAATGTACAAAACCTATTAATTTCCCTCATCATAGGCACAGTGG  
TGCACAGGTTGAACTTTGATGGAGAGAGTACAGGATACCCAGAGTTGGAGGCATATTTGTG  
TAAAATTGGTGTGCCGCAGCTGGAATTTACTCTTGAAGATTTGAGCGCCAACACTACTATGG  
TGGTGTATGGTGACGATGGGATATTTTCAGTGTGACGACGAACAGGCAGAGTATTTCAATTCA  
CAAACCATTAATCTAGTACTGAAGCAACAAGGGAGAGGTTGTCAC

>Aedes\_permutotetra-like\_virus\_1\_rdrp\_MT808062

CCTTCACCTCATCCTCAGGGAGGATGGGGCCGACGGGAAACATCGTCCAGGGGCTGTGCG  
GCCAACCCCCCAAACACTTTTCTTAAACTCTCTCTCAACATACGAATACAACATGGACGC  
ATCAAACCCAGTAATCGGAGAACGCACCACAGTTGCAGACGTGCTTGAAAAAGCTTCAGG  
CCTGAAGAGACAGAATTTGGAGTATTTGCGGGAGGTCGCCCCGCACAGCCCCCTATAGTTTCG  
GAGTTCAAGGCCGCCATCCCCAAGGTGTCCCCCGTTAAGGAGGGATCCCTGGACCCGGAG  
GTCTTTGAAGTGGTCATGGACGCGATGCCTGTCTGCGGTCTACTGGATCAAGAGGGAGTCC  
CTCTCCATCCACCCGGAATCAACATGCTCTCATCTCACGTCAACGTCAACAGACAATTTGGC  
TTAACAGCCCCGGCTCCCCCTGGCTAGGTCCGCGGCCTATAATGTAATGGGACGACAGATACT  
AGGCCCAAGGGAGCCGGTGGACTGTTTAGCCAAATTGTCTGTTGACGTTGAAGTGATGGGA  
CGACAGATACTAGAGCGGAAACATGTGTACACCTCAGGCACCTGGGAAGGTTTTACCAACC  
GTCTCAGGGAACAAATGTCCCGGAAGACGGTGCCCATAGAACC GCCATGGCGCGGATCTC  
AGGAGCTAAGAGTGTGTCCATGAAATACGCCCTAGACCGCCTAGACAAGCTGATGCCGCGA  
TCCCCCAATAAGGAATGGCCCGGAGTGCATACTCCGCTATCCGACGCCATCCTTAACGGAAT  
AGAAATCACCGCAAACCTCCTCCGGTCTTTTCACAGCTCCGTGCCCCCAAACAAATGGACGC  
ATCAAACCCAGTAATCGGAGAACGCACCACAGTTGCAGACGTGCTTGAAAGCTTCAGGC  
CTGAAGAGACAGAATTTGGAGTATTTGCGGGAGGTCGCCCCGCACAGCCCCCTAGGACGATGT  
TTCCCGTCGGCCCCATCCTCCCTGAGGATGAGGTGAAGGCTATAGTTTTCGGAGTTCAAGGC  
CGCCATCCCCAAGGTGTCCCCCGTTAAGGAGGGATCCCTGGACCCGGAGGTCTTTGAAGTG  
GTCATGGACGCGATGCCTGTCTGCGGTCTACTGGATCAAGAGGGAGTCCCTCTCCATCCAC  
CCGGAATCAACATGCTCTCATCTCACGTCAACGTCAACAGACAATTTGGCTTAACAGCCCC  
GGCTCCCCCTGGGCCTGGTGTCTGCTGCTGAAGTGATGGGACGACAGATACTAGAGCGGAA  
ACATGTGTACACCTCAGGCACCTGGGAAGGTTTTACCAACCGTCTCAGGGAACAAATGTCC  
CGGAAGACGGTGCCCATAGAACC GCCATGGCGCGGATCTCAGGAGCTAAGAGTGTGTCC  
ATGAAATACGCCCTAGACCGCCTAGACAAGCTGATGCCGCGATCCCCCAATAAGGAATGGC  
CCGGAGTGCATACTCCGCTATCCGACGCCATCCTTAACGGAATAGAAATCACCGCAAACCTCC  
TCAGCAGGAGCCCCATACTGGAGGAACAAAGGAGAATGCATGTCCAGATCGTCGATGTGG  
GTCTGCCTATCCTAATAAAAGCCCTCAAAGAGAACAGCATAGCAGACCTCTGGAGAACCAA  
CCCAGAGATGCTGCTGTGTGAAGTGAAGAACAACCTGGACAGATACCTGGAAACTGAGCT  
GAGCACCAAGACCCGCCCTATGTGTGCGTACCTGCACACATAGCGTTTCTGTGCTCGGTTT  
TTCCAGGGCTTCCAAGCAACTCTCCACACCTTTGACAGGGATCCAAACTCCGCCAATGC  
ATATGGGTTCTCCTCCACTGACGGAGGACTTCAAAGGATGTACACCTGGATGACGCACAAG  
CCTACAAGCAGAGGTAAATTCTGCAGCTACGGAGATGACACCCGCCTAGTGGTCCTGCACG

AAGGTCGGGTCTGGATTGTAGATCCTGACGCTAAGCAAATGGACGGATCAATAGATGAGGA  
TGATGTGAACTAACCATTGAGTGGATCCTGAGGCACCTTTGCCAGGACTCAGGAGACCTT  
CTGTGCGCACTTCTGGAGAGGAGTGGCCAACTCTGGCACCACACGGCAACAAACCCCCAC  
TTTCTAGTAGACGGAAAGAAGGTCTATCGGAAGAGGTCCAAAAACGGTCTCATGACTGGG  
ACACCAGGGACAACCCTCTTTGACACGGTCAAATCTGTTCTCCTGTGGGACTCCTATTTGG  
AGACCTGCCAGCTCCAAAACCTGGAACCCCTAGATGGAAACAGGGCCAAGAGCTACATGG  
CCGAGAACGGATTGGTCATCAAGGAGGGAACATGGAACCCTGTACAACCTACCAGAAATGA  
GGCATGGACAGCTCATGACAGACCACAAGTTTCTAGGGGTCCAAATGCTGTGCCTGGAGTG  
GCAGCACCATAACATATTTGTGCCACCCCTCCCGGAAGACGAAGCTCTTGAGATGATACTGG  
TTCAGAAGGACAACCCCTTTACCAGCAAGAAGGAGTCGCAAACCATAAAAATGAGGCGGC  
TCTTTGACAGGATGAGGGGTCTCTTCCTAACCTTTGGATTCTCAATTCGAGCATCAGAAGG  
GTCATATACAATATAGTAAACAAAATCCCCGCTGAGTACGTCCTGATGCAAACTCAGGTAGA  
AGGAGGAGAAAAGCCCGAGCACATAACCCTACAGGAAGTAACCTACCCTGACTCTACAGG  
TTTCCCATCGATAGAGTTCTGTTACAACCTGTACTCGGGGCTCTTTGAAGCCGACATTGGGT  
GGGATCAGATATATCCAACCATGCTACCTACACTGAGGAACTTAAGGACAGAGAGACGCCA  
ATTAGGAAAGGAGCTGCGACTAGCGACCACCGAGCTGGATGACAAAACAGGCAGGTGGT  
CGCTGAGGAGGCCCCAGACCCCCCCCCCTCTGGACCCCATATGGAGGTGGCCGAGGCCATG  
AACCCGATCAACTTCCCACCCCTCGGAGAGGTGAATAAGAGAAGCTTTATTGGTAAGGTCA  
CGGACTCATCCACGTGGAACCCAGGAAGAGAATACCCACCCGAGCCGAGGTGGTTTGA  
AGGCTGTCAATGAGAGGACCGTCACCCAGGTAGGAACCCTGCTTGAGGAGTTCTCTCTTAA  
CCCGACCAGCCTCTACACCATAGCCCGGGAACACGGTCTCTACCTAACCGGTCTAGAACCA  
GGGGACCTCTGCTCGGTCTACCCCATTTGCAACACCCTTCCCCACCATCCAGGAGGGTCTCA  
CCCAGGAGTGGAACAGAACAGAACAGGTGGATGCCGGAACAACCAAGAGAACCCAG  
GCTCTGCAACGCCAGGCCAGGAACAGGTTGTTAGAACGGCTCCGACCCTTGTCCGGATG  
GACCACGATGTCCTGTCCGGCCTGGAGTTCGACACTCCAGGGATGAAGCTCATGCCGTGG  
AACTCCTGAACCCTGCCCTGAACAGAGTTTTTGGAGGAATGCGCTGGTCCACCAAGGAGG  
TCCAGCCCCATGAGCCAAACCCAGTCACAGCCGTGCTCAGCGTCTGGACTGGTGACGGGT  
GGGAACCCGTCGCGGAGGCCAGGAGTGCCAACAAGAGGCTTGCTCAGCAGTACATAGCCC  
GGCAAATCCTCTTGCAAGACGGAGTGGAACCCCCCACTTCTGTGTTACCCCCGCCATACC  
GCCCCCCCCCTGGAGACAACTTGACTGGGCGACGGACTACGAAACCACGATGGGTCCCTAT  
CGCTCCCCCATAGTCGTCGAGTTTGATAACGGCGAGACTCGGGAGGTACACCCCGAGTCTC  
GCCGGTATCAAACCTCGACGCCTATGGAGGAGCGATAGGGAGCCAGCATGGTTGGGTTTGAT  
AACGTGGAGAAGCGGAGTGATCTCCCGAGTATCCCGTTCTCCAACCTCGAGACCGAACGA  
TACCTCGTGCGCCCCCATCGTAGTCACGTTTATAAAAGCGAGAAGCGGGAGGGACCCTTGT

>Aedes\_permutotetra-like\_virus\_2\_strainAP60\_capsid\_MT808063

GGGGATTGAGGTGGGGGTCTGGAGCTGGTTGTGGTGGGAAAAATCTTTGCCTCCTCATGTG  
CCCTCCCCTCCCCTGCGGAGCGATCGTAGCCACCGTGGTGGAGGCGGGATGGTTCTCTGA  
CTCAATCCTATGCGTAGGAGTGGGGCCGGAGAGACCCCCACATTGGGGGGACAACCCGT  
GCCAACCAACTACCTCCCCTACTACTCTGTGCGAGTTTTTCGGCAGGCCCTGTGGGTTTTTATA  
ACCACTTTCTTGTGGATAGGGACCCTCAGGGTTGGGAGCTAGTTCCTCGCTACACAGTTGT  
GGGGACCGGAGTTCTTCTCGATCTAGAGGGGGAACACAGTGTCCCCAAGGTATACGAAAC  
GTCCGACGGACGCTTCTGCGTAAAGGGCTTGTTGACGGGGAGGTCCTGTCAAGGGGGATG  
CCGAGCGTCCTCTTTGACTGACCTCCCCTGTGCTTGCAGACTTCCGGTCCTTCAAGGCCCG  
GCTGTGACCCCTGAGGAGGCCACAGATCTGCCGAGATAGGAAGCATCTGGACCTACAGG  
AAGACACCTCAGGGTGTCCGAGCCTTGTTCCGAGATGTGCGACTCTTCCCTTCAGGAGGAAT  
GCCAGGCTTACCTCCAGACTGCCACCTATGTCTCACAGTACCACAAGTCCGCCGTGGTGCA  
CCTCCTACAGCTGGTGTGGACCCTGGTCCTGAAACTCCTCTCCCTTCTATGGAGCTGGATTG  
ACAATGGACTAGTGCTCCCCACCAACCCCCGGGGTGTATCCGCCACGGTGTGGACGGCTGT

GCTGAGTGGCGTGGCCCTGTCGAGAGGGCTCTGGCCCAGTAATTTGTATGTGCAGTTGGCT  
GTCCTTACTTCTGGCTTTCTGTTTCTTCTT

>Aedes\_permutotetra-like\_virus\_2\_strainAP59\_capsid\_MT808064

CTAGTCTACGATGCCACCCAGGAGTACTGCGAGGGGACGACCTGCATGCGGTACTATCGCA  
GCAGGCTCCTCCCCAACGACCCTGTGAGAGTCGAGGACACTTGGAAGCTGTTCCACCACC  
ACCCACACGTCAGCCCCCACCTAATCCCCTGGGGGGCGTCCGATGCTTGCAAAGTCAATGT  
GTCGGTCGCCCTAGGACCCCAATTGGGGTTCTGTCTACAGGGGATTCAGAGTGGGGTGTCTG  
GAGCTGGTTGTGGTGGGAAAAATCTTTGCCTCCTCATGTGCCCTCCCCTCCCCTGCGGAG  
CGATCGTAGCCACCGTGGTGGAGGCGGGATGGTTCTCTGACTCAATCCTATGCGTAGGAGT  
GGGGCCGGAGAGACCCCCCACATTGGGGGGACAACCCGTGCCAACCAACTACCTCCCCTA  
CTACTCTGTGCGAGTTTTTCGGCAGGCCCTGTGGGTTTTTCATAACCACTTTCTTGTGGTTAGGG  
ACCTCAGGGTTGGGAGCTAGTTCCTCGCTTCACAGTTGTGGGGACCGGAGTTCTTCTCGA  
TCTAGAGGGGAAACTCAGTGTCCCCAAGGTATACGAAACGTCCGACGGACGCTTCTGCGTA  
AAGGGCCTGGTTGACGGGGAGGTCCTGTCAAGGGGATGCCGAGCGTCCTCTTTGACTGAC  
CTCCCCTGTGCTTGACAGACTTCCGGTCTTCAAGGCCCGGCTGTCGACCCTGAGGAGGCC  
TCAGATCTGCCGAGATAGGAAGCATCTGGACCTACAGGAAGACACCTCAGGGTGTCCGAG  
CCTTGTTTCGGAGATGTGCGACTCTTCCCTTCAGGAGGAATGCCAGGCTTACCTCCAGACCGC  
CACCTATGTCTCACAGTACCTCAAGTCCGCCGTGGTGCACCTCCTACAGCTGGTGTGGACC  
CTGGTCTGAAACTCCTCTCCCTTCTATGGAGCTGGATTGACAATGGACTAGTGCTCCTCAC  
CACCCCTGGGGTGTGATCAGCCACGGTATGGACGGCTGTGCTGAGTGGCGTGGCCCTGTGCG  
AGAGGGCTCTGGCCCAGCAATCTGTATGTGCGAGCTGGCTGTCCTTACCTCCGGCTTTCTGTT  
TCTTCTTTCGGGCCCTTCACAGGGCTCCCCTCTTTCGAAGTGATCAGAGGGGATACCTCCCC  
TCTACCCCTTCGAAAGAGTGGGAGCCCTGTCGAGAGGGCTCTGGCCCAGCCATCTGTAT

>Guadeloupe\_mosquito\_viruses\_strain\_AP03\_segment1\_MT808014

CUUUCUCACUGACAUAAAGUGCCAGUGAGAAAGCUAUGCCGGGAAGUUCUUUUGAGGUA  
GCUAAAGUCCUGCCUACUUUCCAGGCUAUGGUAAUGGCAUCGUUAGAUGGGAUUACCA  
UAGCCUGUAAAACGAGAUUGGAAACUGUGAAUGUUAUUUACACCACUGUGAGUGACGCG  
GUAGGAUAUAUUUCCAUAACCACUGCAGGUAGUCGCCUUAUGAUGUCAGCUAUAUAUGA  
UGUCAUUUGUGGUGAACCCGUUGAAUAAAGCCAUGUUGGCGGUAUCCUUCUACGUGCA  
AACCAGAUUUUCUUUGAAAUACAUAUGGAGCCUUGCGCCAUCGAUUGAAGGGAUAAUC  
CACGAGCGAUUGUCAGAGACGUAAUUCUAAAGUGCAUAUGGAAACUUUGGAAACGUUUU  
UAUUAGACUAUAAGGUCUAUUUAAUGGCGAUAGCAUGUGGUUUUGUUAUCCUUCUUUC  
GAGCUACAUAAGUGCCAGCUCCAGCUUGGCCAUUAGGCACCUCAAAAGACCACCGUGC  
GUUUGUGGUGCCUAAUGGCCAAGCUGGAGCUGGCACUUAUGUCAGUGAGAAAGCUAUG  
CCGGGAAGUUCUUUUGAGGUAGCUAAAGUCCUGCCUACUUUCCAGGCUAUGGUAAUGG  
CAUCGUUAGAUGGGAUUACUUAUCACGUUAUGGGCCAGUGUUUCUGGGUCGAUGAAGG  
CUUAGUGACAGCAGCCCACGUGAUUGAGGGUUUUGAAUAUUUGUGUAUCUACUUCGAU  
GCGUUUCUCUUCGUCCUUGUAGAACCAAAAACAUAUCGAGAUCCGCAGAGUGUUGGUUU  
GCGUCAUACUCCUAAUCCCCUUGGAUAACGCAAAAAUUGGGUUUGAGCAAAGCAAA  
GUUUGCGAGGCUGGCGGUCGAAAAAGAUGCCGGCUUGAGUGUUAACAUCACAGCCAUG  
GGAAAGAGAACGAUAGGAUUCUAGAUAGACAUCACAAUUUGGGUAUGUUCGAUAUA  
GUGGAAGCACCAUUAAGGAUUUAGUGGAGCUCCUACUUAUUUGGCAGGACCAUAUU  
UGGAAUGCAUCUGGGGUCGGACUCUAAGAACCUUGGUUAUGAUGGAGCAUUCUUGAAA  
ACUGAACUCAAGCCCAGUCGGGUUAUAAGAAUUCGUAUAUUUAAGAACUGAAGAUUA  
GUGCAAGUUUUCUAGAGCAGCAGUUAGAGCGUUAUGAAGAAGUAGAGUAUUCAGAUUC  
CCGUUAUAUCCCGAUGAAUAUAAGGUUAGGAUUGGAGGGAUGUAUCAUAUUGUUGAU

GAGGAAGUGUUGAGUACCGUCUUAAGAGAAGA UCCGCUAAGCGAGCACAGGGGGAUU  
UACAAUAUUUGGCUGAACAAGCUGAAGUUGGGCCCCUCAUUGAUCUCGAAGCUGUAAC  
CACUAAGGGAGACCUUACUAGGUCUCAACAGAGUGGACAAAAACAGCACCAGGAGCUU  
UCUACUGAGACGGAUCCGAUAAUAGCCAUGACUAAAGGGCUAUUGUCAGAAUUUGGCA  
AAACAUCAGUGUACGUUCCUCCAGAACCUAAGAGUAAAGACCAAGGGACAUGCACUAG  
UUGUGAGUCUUGUGGGCGCCUAUAUAUAUUGGGGGGAGUCUAUGCCACGGGCCCCAACG  
CCUACUGCGGAUGCCAAGAAAGCGGAAGAUUUACCUUUAGCGCCUAGGAAUGCCAUGA  
CGUUUAAUGAUUCCGAAAACCUGAUCAGGGCUC CAGCUGUAGUUGUUGGGGCCCCGUGG  
CAUGGAAUAUCAGAGGGAAAGUGUACAGAGCCACGACUUGCCAAGAUGCAAGAAAAUG  
GAUUGCAUGUGCCAGAAACCUUUGGAGACCUGCCUUAUGGAAUCCCGUACA UUGACGC  
GUGCUC CGCUAAAAGAAGCUUCCGCACGCACUGUCAGAAACAAAAACAGACGGAUGCG  
CCGCCAACAGCAGAAGAAAGAACUAGAGCAGUUCAAGCAGCUCUACGGACCUAUUCUG  
CAUGGUGGUGUGACCUCGCAUCCGCAGCAGAUCCCCACAAAUGGUUUUGAUAGGGAAUU  
CAAUAAAGCACUAGAGGAGAUAGAU AUGGAUAGCACUCCUGGCUACUGUAUUUUUGACU  
CUUUUAGGCUCUACGAAUGCGCAAUCUUCGGUUGGAAUGGUUAUAUGCUGUGAUCCGG  
AUAGAGUUAGUAUGGUACGAGAGCAUGUCAAAUUAAGGUUCAUAGAGUUGUUGGCAG  
GUAAGGCUGUGAGCGAUUGUAUUAAGGUUUUUGUGAAGCAAGAGCCGCAUAAAAUGA  
AGAAAAUUCAGGAAGGUACUUAUCGCUUGAU AAGCGCUAUAACCUUAAUUGAUACCUU  
UAUUGACAGAAUUUUGCUUACUUAUAGCCAGCCUCCAACUGGACUCCACCGGUGAG  
ACGCCAUGUCUCCUCGGGUGGAGUCCAGUUAGAGGGCGGAUGGGCGUAAGAUAGUGAACA  
GGUUUGGCAACCAAGCAGUAAAUUGUUUAGAUAGAUCGGCUUGGGAUUGGACUGUACA  
AGGCUAUUUAGUUGAUCUUGGAUAUUGUUUUUGGAAAAUUUACCAGUGAAUCCUCCA  
GACUGGUGGCUUAAGAUGAUGAAACUACGUUUUAAGCUACUGUUUGAGGAGGUUUGG  
UUUCGGUUCGAAGACGGAACAAGAGUAAAGCAGUCUACUGACUACGUAAUGAAGAGUG  
GCUGCGACUUGACUAUUUUACAAAAUAGUCUUAAGCCAAAGUCUCUUA CAUUAACGUAGU  
CAACAGUAGAUGUGGGAAGCCCAUGACCAUGAAACAACCAUACUCGAUAGGUGAUGAC  
ACGGUACAGGAAGCUAUGGAUUGGCUUCUAGACUAUGUUAAGACAACUCGAGAUAUUGG  
GAAUCACGGUCAAGGAGCUAAAGUCCAGCAUUGGGUUGAAUUUGCGGGGAUCUAUUC  
GUACAGGAAAACUUGUUAUCCGGCAUACUGGCAAAAACAUCUUUUUAACCUUAAGUAU  
ACGCAAAAUCUUGGGGAGACUUUGCGUAGUUAUCAGUAUUUGUACGUCAAUGAGCCUG  
UGAUGUACGAAUUUGUGUGUAGAGUGGCUCGUGAGUUAGGUCCUCGUUUCGUCUUGCC  
UAAGAUAGAAGCACUAGACAUAAUGAAUCAACCAAAUUGAUCCUAUGUCUAGUGCUUC  
UAUCUUAGGCAAGACGAAACGAGGACCUAACUCACGAGCCACUCUACACACAAAUUCG  
UACGUCAAUGAGCCUGUGAUGUACGAAUUUGUGUGUAGAGUGGCUCGUGAGUUAGGUC

>Guadeloupe\_mosquito\_viruses\_strain\_AP03\_segment2\_MT808015

UUGGUGCUUCCUACU UUCGUAUGUCUUCUUCGUCACUUUAAUUUUUAUAAUUGUAACA  
CAAUGAGUAAAAAGUUUAAGAACCAUCUUCGCAUCUUUAACUGCUCAAUUAGCGUCGA  
UGAGACGCUUGCCAAACCGCAACCUCACGCUUCUGCUAAGAAACGGCGCAAUAGUCGC  
AAUAAAGAAACGUGGUGGAGCCGACAGGUCCGAGCGGAUUUCUACUUAUGGACGUAAU  
ACCGUUCAGAGAGCCGAGCUC CUGUUCGAGAUAAAGGUGGCCAAAGGUGGCUCUCCA  
CUGGUCAUUAUUACGAAGCCUUGCAGCCGACCUCGACCCGAAUGACGUGGCUAAAGAC  
UCUGAGAGAAACGUUUCUCUCAGAUCAUUGGCAU UCCGCGAGACUUGAGUAUCGCCC  
UGCUGUGGGGGCGAUCACAGAUGGCUCUCUGGUCGUCGAGUCGACUGGGACCCUACG  
ACGACCGUGCCUAGUAAAAGCAAGGUCCAAAGUCUGUACUCCUAACUUCAGGUCCCG  
GUAUGGCAGAAGAAGGAGUUGACUCUCC CAGCGUCUCGGUUGCAGAGUCGUAAGUAUU  
AUGCUCUCUCAGAUUCAGGGUAUAUACCCUGAUAGGCGAUACCUUUUGUGCUCCAGA  
UGUCUCCAAAGUGACUUGUUC CUGAAUCCUUAUAGGGAACAGUACUUGGAGACAUC  
UGGAUCCACUAUAAGGUAAACCCUGCAGGGGCCUAAAUAGGGAGACGAGACGCCCCCCC

CAUUACCUCCAGGACCUAGUGUGUUUGAUUACCACAUGGUUCGGGAGGUGACCCUAUA  
UGAAGUGCGGGCCAUUGUAAGACCUAAAUAUGAGCCCCAACAUAAACAUACUUCUGGA  
UCUCAUAAAGGUUUUAUGGUACCCAGAAGUGCGUGGGUCGCUAUGGGGGGCUCAUAAUUU  
AUUCUAGCGGCGGCUGUGGUUUUAGUCAUUGGAACCGAUUUAAACUAUCGAGGAUCAUU  
AUGGCGUUUCUCACGACGAUUCUACGGUUCAUUUCGUGCUUCAAUUCUAGGAACAUC  
UUUGUUCCUGACAUGGAAUGUCAGACCUGUAGGAUUGGUGCACAUUGGUCUAUCUUUG  
AAAAGUCCGUAAUUUCCGAAGAUAGCUAUGUUUGCUUUUACGGUUCAUUUCGUGUCA  
AUACGAACAUCUUUGUUCUCAGGCUCUUCAAAGAAGUGCACGUUGCUAUUUAUGAUA  
CCGUCUGUUGGAUCAAGAUUUCUUAUCAACUAUUUAACUUUAUCAUGAACCA AUGCU  
CCUACGAGCGAUACUUGGUUCAUGAUAAAGUUUUGUCAGUUGAUAGAAAUCUAGAUC  
CAACAGCGGUAAUAAAUGGUUACCAUCGUCAUCAACCAAACCUAUGUGGAUUGGUUGAU  
GACGAUGUUAACAUGUUAUUACCGCUGUUAGGAUCAUUAUGACUUUCUAU

>Guadeloupe\_mosquito\_viruses\_strain\_AP08\_segment1\_MT808016

CACGUGAUUGAGGGUUUUGAAUAAUUGUGUAUCUACAAGGACGAAGAGAAACGCAUCG  
AAGUAGGACCAAAAACAUAUCAAACCCUCAUUGUGGGCUGCGCACUAAGCCGGCAUUC  
GACCGCCACCUCGCAAAA AUUGGGUUUGAGCAAAGCAAAGUUUGCGAGGCUGGCGGUC  
GAAAAAGA UCCCGGCUUGAGUGUUAACAUCACAGCCAUGGGAAAGAGAACGAUAGGAU  
UCCUAGAUAGACAUCCACAAUUGGGUAUGUUCGUUAUAGUGGAAGCACCAUUAAGG  
CUUAGUGGUGCUUCACUAUAACGGCAGGACCAUAUUUGAAAUGCAUCAGGGGUCU  
GAAUCUCUACUUCUUAUAACGUCUGGCUGCUCUUGAAAACUGAACUCAAGCCCAGUC  
GGGUUAUACGAAACCAGUUAAA UUAAGAACUGAAGAUAGUGCAAGUUUUCUAGAGCC  
GCAGUUAGAGCGUGAUGAAGAAGUACA UCCCUCCAGAUCCCCGUAAAUCCCGAUGAA  
UAUAAGGUUAGGAUUGGAGGGAUGUAUCAUAUUGUUGAUGAGGAAGUGUUGAGUACC  
GUCUUAAGAGAAGA UCCGCUAAGCGAGCACAGGGGGAUUUACAAUAUUCGGCUGAAC  
AAGCUGAAGUUGGGCCCCUCAUUGAUCUCGAAGCUGUAACCACUCUGGGAGACCUUAG  
UAGGUCUCACCUUAGUGGACAAAAACAGCACCAGGAGCUUUCUACUGAGACGGAUCCG  
AUAAUAGCUAUGACUAAAGGGCUAUUGUCAGAAUUGGCAAACCUACAGUGUACGUUC  
CUCCAGAACCUAAGAGUAAAGACCAAGGGACAUGCACUAGUUGUGAGUCUUGUGGCGC  
CUAUUAUAUUGCGGGGAGUCCAGGGCUAUUCCUACCACGGGCCCCAACGCCUACUGC  
GGAUGCCAAGAAAGCGGCAGAUUUAUCUUUAGCGACUGGCAUGCCAUGACGUUUA AUG  
AUUCGGAAUAUCUCAUCACGGCUCCAGCUGUAGUUGUUGGGUCCCGCGGCAUCGAAUA  
CCAGAAGGAAAGUGAUCAGAACCAAGAAUGCCAAUAUUAAGAACAUGGAUUUCAU  
UGCCAGGAACCAUGGGAGACCUGCCAUAAGGAAACCCGUACA UUGACGCGUGCUCCGC  
CAAAAGAAGCUUCCGCACGCACUGUCAGAAACAAAACAGACGGAUGCGCCGCCAAC  
GCAGAAGAAAGAAACUAGAGCAGUUAAGCAGCUCUACGGACCUAUUCCGCAUGGAGGU  
GUGACCUUACA UCCGCAGCAGAUCCCCACAAUUGGUUUGACAGGGAGUUCAUAAAGC  
ACUAGAGGUCACAGCUACCGCCAACACUCAUUGCAACCUUAAUUUGACUCUUUUAGGC  
UCUACGAAUGCGCAAUUCUUUGGUUGGAAUGGUUAUUGCUGUGAUCCGGAUAGAGUUA  
GUAUGGUACGAGAGCAUGUCAAAUUAAGGUUCAUUGAGUUGUUGGCAGGUAAAGGCUG  
UGAGCGAUUGUAUUAAGGUUUUUGUGAAGCAAGAGCCUUCAACAAUGAAGAAAAUUC  
GGACGGUACUUAUCGCUUGAUCAGCGCUGUUAAGCUUAAUUGAUACCUUUAUUGACAGA  
AUUUUGUUCGCUUGGUUAGCCAGAGCUCAGAUUGGAU UCCGUCGGGGAGACGCCAUGUC  
UCAUCGGGUGGAGUCCAGUUAGAGGCGGAUGGCGUAAGAUAGUGAACAGGUUUGGCAA  
CCAAGCAGUAAA UUGUUUAGAUAGAUCGGCUUGGGAUUGGACUGUACAAGGCUAUUUA  
AUUGAUCUUUGGAUAUUGUUUUUGGAAA UUUACCAGUGAAUCCUCCAGACUGGUGGC  
UUAAGAUGAUGAACUUAACUUAAGCUACUGUUUGAAGAGGUUUGGUUUCAGUUCGA  
AGACGGGACAAGAGUAAAGCAGGCAACGCGAGGAGUAAUGAAGAGUGGUUGCUAUUUA  
ACUAUUUUGUUA AAUAGAACCAUCUUAUCUUCUUAUCAUACGUAGUCAACAGUAGAU

GUGGGAAGCCCAUGACUAUGAAACAACCAUACUCGAUAGAUGAUGACACGGUACAGGA  
AGCUAUGGAGUGGCUUGUAUACUACGAUGGGCUUCUCCACAUAUUGGGAAUCACGGUC  
AAAGGAGCUAAAGUCCAGCAUUGGGUUGAAUUCGCGGGGUUCUGUUUUGACGGGAAAA  
CUUGUUAUCCGGCAUACUGGCAAAAACAUCUUUUUAACCUUAAGUAUACGCAAUAUCU  
UAAGGUUAACAAAGAGUACUCUACACACUCGUACAUCACAGAGCUCAUUAACGUACGAA  
UUUGUGUGUAGAGUGGCUCGUGAGUUAGGUCCUCGUUUCGUCUUGCCUAAGAUAGAAG  
CACUAGACAUAAAGGAUCAAUUUGAUUGAUUCAUUAUGUCUAGUUCGCUUCUAUCUUA  
UGGCAAGACGAAACGAGGACCUAACUCACGAGC

>Guadeloupe\_mosquito\_viruses\_strain\_AP08\_segment2\_MT808017

AUCUUUAACUGCUCAAGUAGCUGCGAUGAAGGUUGCGGUUUGGCAACCUUCAUCGCAG  
CUACUUGAGCAGUUAAGAUGCAAGCUGUUUCUUAACUGUUUACUCAUUGUGUUAAA  
AUAAAGCAAUGAGUAAACAGUUGAAGAAACAGCUUGCAUCUUUAACUGUUUACUCAU  
GUGUUAGAAUAAAGAAAUAGUAAGUGAUUUUAUGCUUCCUUGGUUAGCCCUCAUAUA  
ACUGAGUUUAAUUGCUUUUAUUUUAACACAAUGAGUAAACAGUUGAAGAAACAGCUUGC  
AUCUUUAACUGCCCAAUAGCAGCAGACCCCCCUCCGGCCACCGGCUUCCUCACGCUU  
CUGCUGAUUUGCGGCGCUAUUGGCGCAAUAAGAAACGUGGAGGAGCCGCGUGGCCCGAG  
CGGGGUUUCUGCUGAUGGACGUUUUACCGUUCAGAGAGCUGAGCUCCUGUUCGAGAUU  
AAGGUGGCCAAAGGUAGUUCUCCACGUCUUAUUUGACCCCCAGCAGGCGAACUCUA  
GUCUCACGGAAUGGCCAAAUUAUCUGAGAGAAACUACCACUCAGAUAAUUUGGCAUUC  
CGUGAGACUAGAGUAUCGCCCUGCUGUGGGGGCGAUGAAAGAUGGCUCUCUAGUCGUC  
GGAGUCGACUGGGACCCUUAUGACGACCGUGCCUAGUAAAAGCAAGGUCCAAAGUUGUA  
CUCCUAACUUUCAGGUCCCAGGUAUGGCAGAAGAAGGAGUUGACUCUCCAGCGUCUCG  
GUUGCAGAGUCGUAAGUAUUUAUGCUCUCUCAGAUUCAGGGGAUUAUACCCAUGAUAGAC  
AAAGCCCCUUGUGAGGUUUUGGCCUUAUUUGGCUUGUUCUCGAAUAAGGAUGAGGAAC  
AGUACUUUGGAGACAUCUGGAUCCACUAUAAGGUAACCCUGGAGGGGCCUAAAUAGGG  
AGACGAGACGCCCCCCCCAUUACUGUGUGUAGCUAAUUUGUUUGAUUAUCACAUGGUU  
CGGGAGGUAAACCUAUUAUGAAGUGCGGGCCAUUGUAAGAACUAAAUAUGAGCCCCAAC  
AUAAACAGACUUCUGGAUUAUUUAUAAACCCUUGAGAUCCAGAUUGGCGAACAGGGAUUA  
GAUAACGUUAUGCAGCGGCGGCUGAGGUUUUAGUCAUUGGAACCGAUUUUAACUAUUGAG  
GAUAAGUAUAGCGUGUCUCACGAAGGUUCGAAAGGGGACAAAGUGAGUGAAAUUCAAU  
GCGAUUCACGCCCCCGACAUGGAUUCUUGAACCGUGUAGGAUUGAUGCACAUUGGUUU  
AUCUUUGAAAAGUCCGUUUUUCCGAAGAUAGCGAUGUUUGAUUUUACGGUUCAUUUC  
GUGUCAAAUAGGAACGUUCACUUCUUUAAGUUCUUAAGGAACAAAGAUGUUCUACUC  
AAGAAGUGAACGUUGCUAUUUCUGAGAGCGCGAAGAUAAGGUUAUUGGUCCUGUAAU  
GAAUCUUUUCAAUAGUCAAGCUCCUAGGAGCGAUAAUUGGUUCAUGAUAAAGUUUUGU  
CAGUUGAUAGAAAUCUUAGAUCCAACAGCGGUAAUAAAUGUUAACAUCGUCAUCAACC  
AAACCUAUGUGGAUUGGAUGAUGACGAUGUUAACAUGUUAUUACCGCUGAUUUGGAUG  
CUAAUG

>Guadeloupe\_mosquito\_viruses\_strain\_AP09\_segment2\_MT808018

CUAUCAGAAGCGUGGAGGAGCCGCUUGGCCCGAGCGGGGUUUCUGCUGAUGGACGUUU  
ACCGUUCAGAGAGCUGAGCUCCUGUUCGAGAUUAAGGUGGCCAAAGGUAGUUCUCCA  
CGUCUUUAUUAUGAAGCCUUGCAGCCGACCUGGACCCGAAUGACGGGGCUAAAGCCUCU  
GAGGGGUAGAUUCUGUCAGAUAAUCCCAGCCGCCUCCGACGACUAGAGAGCCAUCUU  
UCAUCGCCCCCACAGCAGGGCGAUACUCUAGUCGUCGGAGUCGACUGGGACCCUACGAC  
GACCGUGCCUAGUAAAAGCAAGGUCCAAAGUUGUACUCCUAACUUUCAGGUCCCAGUA  
UGGCAGAAGAAGGAGUUGACUCUCCAGCGUCUCGGUUGCAGAGUCGUAAGUAUUUAUG  
CUCUCUCAGAUUCAGGGGAUUAUACCCAUGAUAGACAAAGCCCCUUGUGAGGUUUUGGC

CUAUUUGGCUUGUUCCUCGAAUAAGGAUGAGGAACAGUACUUUGGAGACAUCUGGAUC  
CACUAUAAGGUAACCCUGCAGGGGCCUAAAUAGGGAGACGAGACGCCCCCCCCCAUUACC  
UCCAGGACCUAGUGUGUUUGAUUAUCACAUGGUUCGGGAGGUAACCCUAUAUGAAGUG  
CGGGCCAUUGUAAGAACUAAAUAUGAGCCCCAACAUAAACAGACUUCUGGAUAUUUA  
AACCCUUUGAGAUCCAGAUGGCGAACAGGGAUUAUGAUAAACGUAUGCAGCGGCGGCUGA  
GGUUUUAGUCAAUUGGAACCGAUUUAAUAUUGAGGAUAAUUAUAGCGUUUCUCACGAU  
GAUUCGAAAGUGGACAACGUGAGCGAAAUAUCAAUGCGCUUCGAGACCCCCGACAUGGA  
AUGUUGAACCUGUAGGAUUGGUGCACAUUGGUUUUAUCUUUGAAAAGUCCGUUUUUUCC  
AAUCUUCGCGCUCUCAGAAAUAAGCAGUUCACUUCGUGUAUGAUAGGAACAAAAAUGUU  
CCUAAGGAUAUAAAAGAAGUGAACGUUGCUAUUUCUGAGAGCGCGAAGACCAAGGUUA  
UUGGUCCUGUAAUGAAUCUUUUCAAUAGUCAAGCUCCUAGGAGCGAUAAUUGGUUCGU  
GAUAAAGUUUUGUCAGUUGAUAGAAAUCUUAGAUAUCCACCAGCGGUAAUAAAUGUUAAC  
AUCGUCAUCAACCAAACCUAUGUG

>Guadeloupe\_mosquito\_viruses\_strain\_AP10\_segment2\_MT808019

GUUGGUUUUUGUAUUCUUUUAGCACUAUAAUUUAGUAGUUGAAGAAAGAGCAAGCUG  
UUUCUUCAACUGUUUACUCAUUGUGUUAUUUUAAAGCAAUUAACUCAGUUAUUUUAAU  
CAGUUAUAUGGGCUAACCAGGAAGCAUAAAUCACUUAUUAUUUCUUUAUUUUAACAC  
AAUGAGUAAACAGUUGAAGAAACAGCUUGCAUCUUUAACUGCUCAAGUAGCUGCGAUG  
AAGGUUGCCAAACCGCAACCUAACGCUUCUGCUAAGAAACGGCGCAAUAGGCGCAAUA  
AGAAACGUGGAGGAGCCGCUUGGCCCGAGCGGGGUUUCUGCUGAUGGACGUUUUACCGU  
UCAGAGAGCUGAGCUCCUGUUCGAGAUUAAGGUGGCCAAAGGUAGUUCUCCACGUCU  
UAUUAUGAAGCCUUGCAGCCGACCUCGACCCGAAUGACGUGGCUAAAGACUCUGAGUG  
GUAGUUUCUCUCAGAUAAUUUGGCAUUCGCGAGACUAGAGUAUCGCCGUGCUGUGGG  
GGCGAUGAAAGAUGGCUCUCUAGUCGUCGGAGUCGACUGGGACCCUACGACGGCCGUG  
CCUAGUAUAAGUCAGGUCCAAAGUUGUACUCCUAAUUCAGGUCCCGGUAUGGCAGA  
AGAAGGAGUUGACUCUCCAGCGUCUCGGUUGCAGAGUCGUAAGUAUUUAGCUCUCUC  
AGAUUCAGGGGAUAUACCCAUGAUAGACAAAGCCCCUUGUGAGGUUUUGGCCUUAUUUG  
GCUUGUUCUCGAAUAAGGAUGAGGAACAGUACUUUGGAGACAUCUGGAUCCACUAUA  
AGGUAACCCUGCAGGGGCCUAAAUAGGGAGACGAGACGCCCCCCCCCAUUACCUCCAGGA  
CCUAGUGUGUGUAAUAAACACAUGGUCCUGGAGGUAAUGCUAUUAUGAAGUGCGGGCCA  
UUGUAAGAACUAAAUAUGAGCCCCAACAUAAACAGACUUCUGGAUAUUUAUAAACCCUU  
UGAGAUAUCCAGAUUGGCGAACAGGGAUUAUGAUAAACGUAUGCAGCGGCGGCUGAGGUUUA  
GUCAAUGGAACCGAUUUAAUAUUGAGGAUAAUUAUAGCGUUUCUCACGAUGAUUCGA  
AAGUGGACAACGUGAGUGAAAUUCAUUGCGCUUCAAGACCCCCGACAUGGAAUGUUGA  
ACCUGUAGGAUUGGUGCACAUUGGUUUUAUCUUUGAAAAGUCCGUUUUUCCGAAGAU  
GCUAUGUUUGAUUUUACGGUUCAUUUCGUGUCAAAUAGGAACAUCUUUGUUCCUAAGG  
CUCUUAAGAAGUGAACGUUGCUAUUUCUGAGAGCGCGAAGAUCAAGGUUAUUGGUCC  
UGUAAUGAAUCUUUUCAAUAGUCAAGCUCCUAGGAGCGAUAAUUGGUUCAUGAUAAAG  
UUCUGUCAGUUGAUAGAAAUCUUAGAUAUCCAGCUUUGCUAAUUCAUGGGGAUAUACCCA  
UGAACAGACCUCCGUAGAUUGGAGAU

>Guadeloupe\_mosquito\_viruses\_strain\_AP15\_segment1\_MT808020

CGACAUAUGGGAUUACUUAUCACGUUAUGGGCCAGUGUUUCUGGGUCGAUGAAGGCUU  
AGUGACAGCAGCCCACGUGAUUGAGGGUUUUGAAUAUUUGUGUAUCUACAAGGACGAA  
GAGAAACGCAUCGAAGUAGGACCAAAAACAUUCAAAAACCCUCAUUGGGGACUGCGCAG  
UAUGGGCCAUUGCAACACUGAUAAACGCAAAAAUUGGGUUUGAGCAAAGCAAAGUUUGC  
GAGGCUGGCACUCGAAAAAGAUGCCGGCUUGAAUGUUAACAUCACAGCCAUGGGAAAG  
AGAACGAUAGGAUCCUAGAUAGACAUAUCCACAAUUGGGUAUGUUCGUUAUAGUGGAA

GCACCACUAAAGCCUUUAGUGGUGCUUCUCACUAUAACGACAGGACCAUAUUUGGAAU  
GCAUCUGGGGGCGGACUCUAAGAACCUUGGUGUUUCUGAGACAUUAGCGAGAGGUGGG  
CGAAGGUGCUUUCGUCUAAAUUUAACUGGUUUCUUAUAACGACUGGGGCUUAGUUCAA  
GUUUUCAAGAGCAGCAGUUAGAGCGUUAUGAAGAAGUAGAGUAUUCUAGAUCUCCGUA  
UAAUCCCGAUGAAUAUAAGGUUAGGAUUGGAGGGAUGUAUCAUAUUGUUGAUGAGGA  
AGUGUUGAGUACCGUCUAAAAGAGAAGAUCCGCUAAGCGAGCACAGGGGGGAUUUACAA  
UAUUUGGCUGAACAAGCUGAAGUUGGGCCCCUCAUUGAUCUCGAAGCUGUAACCACUA  
AGGGAGACCUUACUAGGUCUCACCUUAGUGGUCAAAAACAGCACCAGGAGCUUUCUAC  
UGAGACGGAUCCGAUAAUAGCUAUGACUAAAGGGGCUAUUGUCAGAAUUUCGUACCGUC  
UCAGUGUACGUUCCUCCAGGACGUAAGAGUAAAGACCAAGGGACAUGCACUAGUUGUG  
AGUCUUGUGGCGCCUAUAUACAUUGGGGGGAGGCUCGGGAUAUUCUGCAGCGCCAAC  
UGCGGUUGCCAAGAAAUCGGAAGAUCUACUUUAGCGCCUAGGGAUGCCAUGACGUUU  
AAUGAUUCGGAAAACCUGAUCAGGGCUCAGCUGUAGUUGUUGGGGGCCCGUGGCAUGG  
AAUAUCAGAGGGAAAGUGUACAGGGCCACGACUUGCCAAGAUGCAAUACCAUGGAUUG  
CAUGUGCCAGAAAUCUCUCGAGACCUGCCUUAUGGAAUCCCGUACAUUGACGCGUGCU  
CCGCUAAAAGAAGCUUCCGCACGCACUGUCAGAAACAAAACAGACGGAUGCGCCGCC  
AACAGCAGAAGAAAGAACUAGAGCAGUUAAGCAGCUCUACGUUCUUCUUCUGCAUGU  
UGGCGGCGCAUCACGUCUGUUUCAGACCCCCACAAAUGGUUUGAUAGGGAAUUCAAUA  
AAGCACUAGAGGAGAUAGAUUAGGAUAGCACUCCUGGCUACUGUAUUUUGACUCUUUU  
AGGCUCUACGAAUGCGCAAAUCUUUGGUUGGAAUGGCGUCUCCCGAGAUCGGAUAGA  
GUUGGUAUCCAACGAAAACUUCAUGUCAAAUUAAGGUUCAUAGAGUUGUUGGCAGGUA  
AGGCUGUGAGCGAUUGUAUUAAGGUUUUUGUGAAGCAAGAGCCGCAUAAAUAAGA  
AAAUUCAGGAAGGUACUUAUCGCUUGAUUAAGCGCUGUUAAGCUUAAUUGAUACCUUUAU  
UGACAGAAUUUUGUUCGCUUGGAUAGCCAGAGCUCACAUGGAUUCGUCGAUGAGACG  
UGGCGUCUCCCCGGGUGGAGUCCAGUUAGAGGCGGAUGGCGUAAGAUAGUGAACAGGU  
UUGCCAACCAAGCCGUAAAUUCUAAAAAUUUUUCUGCUUGGGAUUGGACUGUACAAGG  
CUAUUUAGUUGAUCUUUGGAUAUUGUUUUUGGAAAUUUACCAGUGAAUCCUCCAGAC  
UGGUGGCUUAAGAUGAUGAAACUACGUUUUAAGCUACUGUUUGAAGAGGUUUUGGUUU  
CAGUUCGAAGACGGGACAAGAGUAAAGCAGGCAACGCGAGGAGUAAUGAAGAGUGGUU  
GCUAUUUAACUAUUUUGUUAAAUAGUCUCAGCCAAAGUCUCUUAUAUACGUAGUCA  
CAGUAGAUGUGGGAAGCCCAUGACUUAUGAAACAACCAUACUCGAUAGGUGAUGACACG  
GUACAGGAAGCUAUGGAUUGGCUUCUAGACUACGUUAGACAACUCGAGAUUUGGGAA  
UCACGGUCAAGGAGCUAAAGUCCAGCAAUGGGGUUGAAAUUGCGGGGGCACAAAUUCGA  
CAUCAAGGCUCAUUAUACGAAAUACUGGCAAAAACAUCUUUUUAACCUUAAGUAUACG  
CAAAAUCUUGACCUAACUACGAGCACUAYCAAAAUUUGUACGUCAAUGAGCCUGUGA  
UGUACGAAUUUGUGUGUAGAGUGGCUCGUGAGUUAGGUCCUCGUUUCGUCUUGCCUAA  
GAUAGAAGCACUAGACAUAUUGAAUCAACCAAAUUGAUCCUAUGUCUAGUUCGCUUCU  
AUCUUAUGGCAAGCGAAACGGGACUAAUCACGAGCACUGCUACACAAAUAUCGUACA  
AUCACAGGCUCAUUGACGUACGAAUUUGUGUGUAGAGUGGCUCGUGAGUUAGGU

>Guadeloupe\_mosquito\_viruses\_strain\_AP15\_segment2\_MT808021

CGCCGGGCGCGGCUGCCUCACGCUUCUGCUAAGAAACGGCGCAAUAGGCGCAAUAAG  
AAACGUGGAGGAGCCGCUGGCCCGAGCGGGGUUUCUGCUGAUGGACGUAAUACCGUUC  
AGAGAGCUGAGCUCCUGUUCGAGAUUAAGGUGGCCAAAGGUAGUUCUUCCACGUCUUA  
UUAUGAAGCCUUGCAGCCGACCUCGACCCGAUAGACGUGGCUAAGGACUCUGUGUGGU  
AGUUUCUCUCAGAUAAUUGGCAUCCCGCGAUCCGAGACUAUAGGCCAUUCUUCAUCG  
CCCCACAGAGGGCUCUCUAGUCGUCGGAGUCGACUGGGACCCUACUACGACCUUGCCU  
AGUACUAGCAAGGUCCAAAGUUGUACUCCUAAUUCAGGUCCCGGUAUGGCAGAAGA  
AGGAGUUGACUCUCCAGCGUCUCGGUUGCAGAGUCGUAAGUAUUAUGCUCUCUCAGA

UUCAGGGGAUAUACCCAGGAUAGACAAAGCCCCUUGUGAGGUUUUUGGCCUAUUUGGCU  
UGUUCCUCGAAUAAGGAUGAGGAACAGUACUUUGGAGACAUCUGGAUCCACUAUAAGG  
UAACCCUGCAGGGGGCCUAAAUAGGGAGACGAGACGCCCCCCCCCAUUACCUCCAGGACCU  
AGUGUGUUUGAUUACCACAUGGUUCGGGAGGUAACCUUGUAUGAGGGGGGGGCGAUGG  
GAGGAACUGGGUAUGAGCCCCAACAUAAACAGACUUCUGGAUAUUAAUAAACCCUUUGA  
GAUCCAGAUGGGCGAACAGGGAUUAUGAUAAACGUAUGCAGCCGUUGUCCACUUUCGAAUC  
AGUGGAAACGCUAUAAACUAUCCAUAUAGUUUAUAUCGUUUCUCACGAUGAUUCGAAAG  
UGGACAACGUGAGUGAAAUAUCAAUGCGCUUCGAGACCCCCGACAUGGAAUGUUGAACC  
UGUAGGAUUGGUGCACAUAUGGUUUUAUCUUUGAAAAGUCCGUUUUUUCCGAAGAUAGCG  
AUGUUUGAUUUUACGGUUCAUUUCGUGUCAAAUAGGAACAAUUUUGUUCCUAAGGCUC  
UUAAGAAGUGAACGUUGCUAUUUCUGAGAGCGCGAAGAUCAAGGUUAUUGGUCCUGU  
AAUGAAUCUUUCAAUAGUCAAGCUCCUAGGAGCGAUAAUUGGUUCAUGAUAAAGUUU  
UGUCAGUUGAUAGAAAUCUAGAUAUCCAACAGCGGUAAUAAUUGUUAACAUCGUCAUCA  
ACCAAACCUAUGU

>Guadeloupe\_mosquito\_viruses\_strain\_AP17\_segment1\_MT808022

UUUGUGUAUCUACAAGGACGAAGAGAAACGCAUCGAAGUACGACCAAAAACAUUCGAG  
AUCGGCAAUGGGGAUUACGCAGUAUGUCGCAAUCCAAUUAACCGAUCUCGCAAAAUUUG  
GGUUUGAGCAAAGCAAAGUUUGCGAGGCUGGCGGUCGAAAAAGAUGCCGGCUUGAGUG  
UUAACAUCACAGCCAUGGGAAAGAGAACGAUAGGAUUCCUAGAUAGACAUCCACAAUU  
UGGGUAUGUUCGUUAUAGUGGAAGCACCAUUAAGGCUUUAGUGGUGCUCCUACUAU  
AACGCACAGGAGCAUAUUUGGAAUGCAUCUGGGGUCGGACUCUAAGAACCUUGGUUAUG  
AUGGGGCAUUCUUGAAAACUGAACUCAAGCCCAGUCGGGUUAUAAGAAACCAGUUAAA  
UUUAAGAACUGAAGAUAGUGCAAGUUUUCUAGAGCAGCAGUUAGAGCGUUAUGAAGA  
AGUAGAGUAUUCUAGAUCUCCGUUAUUCUCGAGGAUUAUACGGUUAAGGAUUGGAGGG  
AUGUAUCAUAUUGUUGAUGAGGAAGAGUUGAGUACCGUCUUAAGAGAAGAUCCGCUA  
AGCGAGCACAGGGGGGAUUUACAAUAUGAUACAUCCCUCCAAUCUGAAGUUGGGCCCCU  
CAUUGAUCUCGAAGCUGUAACCACUAAGGGAGACCUUACUAGGUCUCAACAGAGUGGA  
CAAAAACAGCACCAGGAGCUUUCUACUGAGACGGAUCCGAUAAUAGCUAUGACUAAAG  
GGCUAUUGUCAGAAUUUGGCAAAACCUCAGUGUACGUUCCUCCAGAACCUAAGAGUAA  
AGACCAAGGGACAUGCACUAGUUGUGAGUCUUGUGGCGCCUAUAUAUAUUGGGGGGAG  
UCUAGGGGAUAUUCUGAAACGCCUACUGCGGAUGCCAAGAAAGCGGAAGAUUUACCUU  
UAGCGCCGAGGGAUGCUAUGACGUUUAUGAUUCGGAAAACCUGAUCAGGGCUCCAGC  
UGUAGUUGUUGGGGCCCGUGGCAUGGAAUAUCAGAGGGAAAGUGUACAGAGCCACGAC  
UUGCCAAGAUGCAAGAAAAUGGAUUGCAUGUGCCAGAAACCUUUGGAGACCUGCCUUA  
UGGAAUCCCGUACAUAUGACGCGUGCUCCGCCAAAAGAAGCUUCCGCACGCACUGUCAG  
AAACAAAAACAGACGGAUGCGCCGCCAACAGCAGAAGAAAGAACUAGAGCAGUUCAAG  
CAGCUCUACGGACCUAUUCCGCAUGGAGGUGUGACCUUACAUCCGCAGCAGAUCCCCAC  
AAUUGGUUUGACAGGGAGUCAAUAAAACAGUAGAGGAGAUAGAUAUCCAUAUCACUC  
CUUGCUCACUGUAUUUUGACUCUUUUAGGCUCUACGAAUGCGCAAUCUUUGGUUGGAA  
UGGUUAUAUGCUGUGAUCCGGAUAGAGUUAGUAUGGUACGAGAGCAUGUCAAAUUAAG  
GUUCAAUAGAGUUGUUGGCAGGUAAGGCUGUGAGCGAUUGUAUUAAGGUUUUUGUGAA  
GCAAGAGCCGCAUAAAAUGAAGAAAAUUCAGGAAGGUACUUAUCGCUUGAUAAAGCGUU  
GUAAGCCUAAUCCCAACCUCUAUCUACACAAUUUUACUCGCUUGGAUAGCCAGAGCUC  
AGAUGGAUUCCGUCGGGGAGACGCCAUGUCUCAUCGGGUGGAGUCCAGUUAGAGGCGG  
AUGGCGUAAGAUAGUGAACAGGUUUGGCAACCAAGCAGUAAAUUGUUUAGAUAGAUCG  
GCUUGGGAUUGGACUGUACAAGGCCAUUUAAUGGAUCUUUGGAUAUUGUUUUUGGAA  
AAUUUACCUUCUGAAUCCGCCAACUGGUUGCUAAGAUGAUGAAAUUACGUUUUAAGC  
UACUGUUUGAAGAGGUUUGGUUUCAGUUCGAAGACGGGACAAGAGUAAAGCAGGCAAC

GCGAGGAGUAAUGAAGAGUGGUUGCUAUUUUAAACUAUUUUGUUAUUUAGUCUCAGCCAA  
AGUCUCUUACAUAUACGUAGUCAACAGUAGAUGUGGGAAGCCCAUGACUAUGAAACAAC  
CAUACUCGAUAGGUGAUGACACGGUACAGGAAGCUAUGGAGUGGCUUGUUUCAGAGUA  
CGAUGGGGCUUCUCCACAUAUUGGGAUACACGGUCAAAAGGGGCUAAGGUCCAGCAUGGG  
GUUGAAUUCGCGGGGUUCUGUUUUGACGGGAAAACUUGUUAUCCGGCAUACUGGCAAA  
AACAUUUUUUAACCUUAAGUAUACGCAAAAUCUUGGGGACCUAACUACGAGCACUCU  
ACACACAAAUUCGUACGUCAAUGAGCCUGUGAUGUACGAAUUUGUGUGUAGAGUGGCU  
CGUGAGUUAGGUCCUCGUUUCGUCUUGCCUAAGAUAGAAGCACUAGACAUAUAUGAAUC  
AACCAAAUUGAUUCACUAUGUCUAGUUCGCUUCUAUCUUAUGGCAAGACGAAACGAGG  
ACCUAACUCACGAG

>Guadeloupe\_mosquito\_viruses\_strain\_AP17\_segment2\_MT808023

UCUCUAGCUGCGGAAUCCAAAUUAUCUGAAGACGAGAACUCCACUCAGUCUUUAGCCA  
CGUCUUCGGGUGAGAGUCGGCGCAAUAGGCGCAAUAAGAAACGUGGAGGAGCCCGCUGG  
CCCGAGCGGGGUUUCUGCUGAUGGACGUAAUACCGUUCAGAGAGCUGAGCUCCUGUUC  
GAGAUUAAGGUGGCCAAAGGUAGUUCUUCACGUCUUAUUAUGAAGCCUUGCAGCCGA  
CCUCGACCCGAAUGACGUGGCUCUGCUCUCCGACCGGAAAUGCGUCUCAGAGAAACCGC  
CGGGCCGCGAGACUAGAGUAUCGCCCUGCUGUGGGGGCGAUGAAGGAUGGCUCUCUAG  
UCGUCGGAGUCAACUCCUUCUCUGCCACUACCGGGCCUAGUAAAGUUAGGGUACAACU  
UUGGACUCUUGCUUUUCAGGUCACGGUAUGGCAGAAGAAGGAGUUGACUCUCCCAGCG  
UCUCGGUUGCAGAGUCGUAAGUAUUAUGCUCUCUCAGAUUCAGGGGAUAUACCCAUGA  
UAGACAAAGCCCCUUGUGAGGUUUUGGCCUAUUUGGCUUGUUCUCGAAUAAGGAUGA  
GGAACAGUACUUUGGAGACAUCUGGAUCCACUAUAAGGUAAAGCUGCAGGGGGGCUAAA  
UAGGGAGACGAGACGCCCCCCCCCAUUACCUCCAGGACCUAGUGUGUUUGAUUAUCACA  
UGGUUCGGGAGGUAACCCUAUAUGAAGUGCGGGCCAUUGUAAGAACUAAAUAUGAGCC  
CCAACAUAAACAGACUUCUGGAUAUUAUAAACCCUUGAGAUCCAGAUUGGCGAACAGG  
GAUAUGAUAAACGUAUGCAGCGGCGGCUGAGGUUUUAGUCAAUUGGAACCGAUUUAACUA  
UUGAGGAUAAUUAUAGCGUUUCUCACGAUGAUUCGAAAGUGGACAACGUGAGCGAAAU  
UCAAUUGCUCUUCGAGACCCUGACAUGCAAGCUUUAUCAUGAACCAAUUAUGCUCUG  
GGUUGCUCUUUGAAAAGUCCGUUUUUACAAGGACCAUAACCUUGAUCUUACGGCGC  
AUCUCGAGUCAAAUAGCAACGUUCACUUCUUUAAGAGCCUAGGAACCACGAAAUGAA  
CGUUGCUAUUUCUGAGAGCGCGAAGAUCAAGGUUAUUGGUCCUGUAAUGAAUCUUUUC  
AAUAGUCAAGCUCCUAGGAGCGAUAAUUGGUUCAUGAUAAAGUUUUGUCAGUUGAUAG  
AAUUCUUAGAUCACACAGCGGUAAUAAAUGUUAACAUCGUCAUCAACCAACCUAUGU  
GGAUUGGUUGAUGACGAUGUUAACAUGUUAUUGGCUGUUAUGGAUUCUAAUGACUUU  
CUAUAACUACAAAACUUAUCUGAACCAAUUU

>Guadeloupe\_mosquito\_viruses\_strain\_AP21\_segment2\_MT808024

CUGUGAUUUCCUUGCUCUUCUUUUAUGUUGUCGUCUGCAUCUUCAGAUUGUGUUAAUA  
UAUAGUUAUUGCGCCUAUUGCUCCUUUUCGUAGCAGAAUCGUUAGGUUGCGGUUUGUC  
AACCUUCAUCGCAGCUACUUGAGCAGUUAAGAUGCAAGCUGUUUCUUAACUUUUUA  
CUCAUUGUGUUAUUUAAGAAAUUAGUAAAUGAUUUUAUGCUUCCUUGGUUAGCCUU  
UAUAUAACUUAGUUUAUUUGCUUUUAUUUAACACAAUGAGUAAACAGUUGAAGAAUC  
UUUUUGCUGUUCUAGCCGUCUUAGUAGAAGCGUUGAAGGUUGCCAAUCGGCAACCUAA  
CGCUUCUGCUAAGAAACGGCGCAAUAGGCGCAAUAAGAAACGUGGAGGAGCCGCUGGC  
CCGAGCGGGGUUUCUGCUGAUGGACGUAAUACCGUUCAGAGAGCUGAGCUCCUGUUCG  
AGAUUAAGGUGGCCAAAGGUAGUUCUUCACGUCUUAUUAUGAAGCCUUGCAGCCGAC  
CUCGACCCGAAUGACGUGGCUGAAACUUCUGGACAGUAGUUCGCUCAGAUAAUUUGG  
CAUUGCGCGAGACUAGAGUAUCGCCCUGCUGUGGGGGGCUAUGAAAGAUGGCUCUCGAG

UCGUCGGAGUCGACUGGGACCCUACGACGACCGUGCCUAGUAAAAGCAAGGUCCAAAG  
UUGUACUCCUAACUUUCAGGUCCCCGGUAUGGCAGAAGAAGGAGUUGACUCUCCCAGCG  
UCUCGGUUGCAGAGUCGUAAGUAUUAUGCUCUCUCAGAUUCAGGGGAUUAUACCCAUGA  
UAGACAAAGCCCCUUGUGAGGUUUUGGCCUAUUUGGCUUGUUCCUCGAAUAAGGAUGA  
GGAACAGUACUUUGGAGACAUCUGGAUCCACUAUAAGGUAACCCUGCAGGGGCCUAAA  
UAGGGAGACGAGACGCCCCCCCCAUUACCUCAGGACCUAGUGUGUUUGAUUACCACA  
UGGUUCGGGAGGUAACCCUAUAUGAAGUGCGGGCCAUUGUAAGACCUGCAUACGUAUC  
AUAUCCCUUGUUCGCCAUCUGGAUCUCAAAAGGUUUUAUAAUAUCCAGAUGGCGAACAGG  
GAUAUGAUAAACGUAUGCAGCGGCGGCUGAGGUUUCAGUCA AUGGAACCGAUUUAAACUA  
UUGAGGAUAAUUAUAGCGUUUCUCACGAUGAUUUCGAAAGUGGACAACGUGAGUGAAAU  
UCA AUGCGCUUCAAGACCCCCGACAUGGAAUGUUGAACCUGUAGGAUUGGUGCACA  
GGUUUAUCUUUGAAAAGUCCGUUUUUUCCGAAGAUAGCGAUGUUUGAUUUUACGGUUC  
AUUUCGUGUCAAUUAGGAACA UUUUUGUCCUAAGCCUCUUAAGAAGUGAACGUUGC  
UAUUUCUGAGAGCGCGAAGAUCAAGGUUAUUGGUCCUGUAAUGAAUCUUUAUCAAUAG  
UCAAGCUCCUAGGACGCGAUAAUUGGUUCAUGAUAAAGUUUUGUCAGUUGAUAGAAAU  
CUUAGA UCCAACAGCGGUAAUAAAUGUUAACAUCGUCAUCAACCAAACCUAUGUGGAU  
UGGAGAUGGGAUGGUGACAUGGUGUUGGAUAUUAACGCCAAUAAUCACGUUCUAUAACU  
CUGUUAACGUCUCUGACGACUCCUACGGUUU

>Guadeloupe\_mosquito\_viruses\_strain\_AP22\_segment1\_MT808025

GUAGAUACACAAAUAUUCAAAACCCUCAUACGUGGGCUUAGUGACAGCAGCCCACG  
UGAUUGAGGGUUUUGAAUAUUUGUGUAUCUACAAGGACGAAGAGAAACGCAUCGAAG  
UAGGACCAAAAACAUUCGAGAU CGGCAAUGGGGAUUGCGACAUACUGCGUAAUCCAAC  
ACUGAUAAACGCAAAAAUUGGGUUUGAGCAAAGCAAAGUUUGCGAGGCUGGCGGUCGAA  
AAAGAUGCCGGCUUGAGUGUUAACAUCACAGCCAUGGGAAAGAGAACGAUAGGAUUC  
UAGAUAGACAUCCACAAUUGGGUAUGUUCGUUAUAGUGGAUGCACCAUUAAGGAUU  
UAGUGGAGCUCCUACUAUUUUGGCAGGACCAUAGUUGGAAUGCAUCUGGGGUCGGAC  
UCUAAGAACCUUGGUUAUGAUGGGGCAUUCUUGAAAACUGAACUCAAGCCCAGUCGGG  
UUUAUAAGAAACCAGUUAUUUAAGAACUGAAGAUAGUGCAAGUUUUCUAGAGCAGCA  
GUUAGAGCGUUAUGAAGAAGUAGAGUAUUCUAGAUCUCCGUUAUAAUCCCGAUGAAUAU  
AAGGUUAGGAUUGGAGGGAUGUAUCAUAUUGUUGAUGAGGAAGUGUUGAGUACCGUC  
UUAAGAGAAAGAUCCGCUAAGCGAGCACAGGGGGAUUUACAAUAUUUGGCUGAACAAAG  
CUGAAGUUGGGCCCCUCAUUGAUCUCGAAGCUGUAACCACUAAGGGAGACCUUACUAG  
GUCUCAACAGAGUGGACAAAAACAGCACCAGGAGCUUUCUACUGAGACGGAUCCGAUA  
AUAGCUAUGACUAAAGGGCUAUUGUCAGAAUUUGGCAAAACCUCAGUGUACGUUCCUC  
CAGAACCUAAGAGUAAAGACCAAGGGACAUGCACUAGUUGUGAGUCUUGUGGGCGCCUA  
UAUAUAUUGGGGGGAGUCUAGGGGAUAUUCUGAAACGCCUACUGCGGAUGCCAAGAAA  
GCGGAAGAUUUACCUUUAGCGCCGAGGA AUGCUAUGACGUUUAUGAUUCGGAAAACC  
UGAUCAGGGCUCCAGCUGUAGUUGUUGGGGCCCGUGGCAUGGAAUAUCAGAGGGAAAG  
UGUACAGAGCCACGACUUGCCAAGAUGCAAGAAAAUGGAUUGCAUGUGCCAGAAACCU  
UUGGAGACCUGCCUUAUGGAAUCCCGUACA UUGACGCGUGCUCCGCCAAAAGAAGCUU  
CCGCACGCACUGUCAGAAACAAAAACAGACGGAUGCGCCGCCAACAGCAGAAGAAAGA  
ACUAGAGCAGUUCAAGCAGCUCUACGGACCUAUUCCGCAUGGAGGUGUGACCUCACAU  
CCGCAGCAGAUCCCCACAAUUGGUUUGAUAGGGAAUUCAAUAAAGCACUAGAGGAGAU  
AGAU AUGUAUAACUCUCCGGAUACAGCAUUAUGACCAUACUAGACUCUACGAAUGCG  
CAAUCUUUGGUUGGAAUGGUUAUUGCUGUGAUCCGGAUAGAGUUAGUAUGGUACGA  
GAGCAUGUCAAAUUAAGGUUCAUAGAGUUGUUGGCAUUGCAAGGCUCUCAUGAAGUUC  
UCCAAAGGUUUUUGGGAAGCAUCGGAGCUCUUAUCCAAGCGAACAAAAUUCUGAAAGG  
UACUUAUCGCUUGAUAAAGCGCUGUUAAGCUUAAUUGAUACCUUUAUUGACAGAAUUUG

UUCGCUUGGAUAGCCAGAGCUCAGAUGGAUUCCGUCGGGGAGACGCCAUGUCUCAUCG  
GGUGGAGUCCAGUUAGAGGCGGAUGGCGUAAGAUAGUGAACAGGUUUGGCAACCAAGC  
AGUAAAUUGUUUAGAUAGAUCGGCUUGGGUUGCGACUGUAGAAGGCUUCUUAAGUCAUC  
GAUCUUAACGUAUUUUAUCUUAAGCCACCAGUGAAUCCUCCAGACUGUUGGCUUA  
AGAUGAUGAAAUUGCGUUUUAAGCUACUGUUUGAAGAGGUUUGGUUUCAGUUCGAAG  
ACGGGACAAGAGUAAAAGCAGGCAACGCGAGGAGUAAUGAAGAGUGGUUGCUAUUUAAAC  
UAUUUUGUUAAAUAGUCUCAGCCAAAGUCUCUUAACAUUACGUAGUCAACAGUAGAUGU  
GGGAAGCCCAUGACUAUGAAACAACCAUACUCGAUAGGUGAUGACACGGUACAGGAAG  
CUAUGGAUUGGCUUCCUGACUACGUUAGACAACUCGAGAUAUUGGGAAUCACGGUCA  
AGGAGCUAAAAGUCCAGCAUUGGGUUGAAUUCGCGGGGUUCUGUUUUGACGGGAAAACU  
UGUUAUCCGGCAUACUGGCAAAAACAUCUUUUUAACCUUAAGUAUACGCAAAAUACUG  
ACAUAAUCUACGAGCACUGAACAAAAUUUGUACGUCAAUGAGCCUGUGAUGUACGAAUU  
UGUGUGUAGAGUGGCUCGUGAGUUAGGUCCUCGUUUCGUCUUGCCUAAGAUAGAAGCA  
CUAGACAUAGUGACUCAAUUUGGUUGAUUCAUUAUGUCUAGUGCUUCUAUCUUAAGGCU  
GAGUGAAACGGGAUGAGUUGGCAACAAUA

>Guadeloupe\_mosquito\_viruses\_strain\_AP22\_segment2\_MT808026

CGUAAUACGCAUCGCAGAAACCCCGCUGGCCCGAGCGGGGUUUCUGCUGAUGGACGUA  
UUACCGUUCAGAGAGCUGAGCUCCUGUUCGAGAUUAAGGUGGCCAAAGGUAGUUCUUC  
CACGUCUUUAUUAUGAAGCCUUGCAGCCGACCUUAACUCGAAUGAGGUUGCCAAAUUAU  
CUGAGUGGUAGUUUCUCUCAGAUAAUUUGGCAUUCCGCGAGACUAGAGUAUCGCCCUG  
CUGUGGGGGCGAUGAAAGAUGGCUCUCUAGUCGUCGGAGUCGACUGGGACCCUACGAC  
UACCGUGCCUAGUAAAUGCAAGGUCCAAGUUGUACUCCUAAAUUUCAGGUCCCGGUA  
UGGCAGAAGAAGGAGUUGACUCUCCCAGCGUCUCGGUUGCAGAGUCGUAAGUAUUUAUG  
CUCUCUCAGAUUCAGGGGAUUAACCAUGAUAGACAAAGCCCCUUGUGAGGUUUUGGC  
CUAUUUGGCUUGUUCUUGAAUAAGGAUGAGGAACAGUACUUGGAGACAUCUGGAUC  
CACUAUAAGGUAACCCUGCAGGGGGCCUAAAUAGGGAGACGAGACGCCCCCCCCCAUUACC  
UCCAGGACCUAGUGUGUUUGAUUAACCAUUGGUUCGGGAGGUGACCCUAUAUGAAGUG  
CGGGCCAUUGGAAGAACUAAAUAUGAGCCCCAACAUACCCCGCCAUCUGGAUCUCAUA  
AAGGUUUUAUAUCCAGAUGGCGAACAGGGGAUUAUGACAACGUAUGCAGCGGGCGGCUGA  
GGUUUCAGUCAAUUGGAACCGAUUUAAAUUAUUGAGGAUAAUUAUAGCGUUUCUCACGAU  
GAUUCGAAAGUGGACAACGUGAGUGAAAUUCAUUGCGCUUCGAGACCCCGACAUGGA  
AUGUUGAACCUGUAGGAUUGGUGCACAUUGGGUUAUCUUUGAAAAGUCCGUUUUUUCC  
GAUCUUCGCGCUCUCAGAAUACAACGUUCACUUCGUUUAAGCCUUAAGGAACAUCUUU  
GUUCCUAAAGGCUCUUAAGAAGUGAACGUUGCUAUUUUCUGAGAGCGCGAAGAUAAGG  
UUAUUGGUCCUGUAAUGAAUCUUUCAAUAGUCAAGCUCCUAGGAGCGAUAAUUGGUU  
CAUGAUAAAGUUUUGUCAGUUGAUAGAAAUCUUAAGAUCCAACAGCGGUAAUAAAUGUU  
AACAUUCGUCAUCAACCAAUCCCAUGAGGUUAAUGGUGAUGCGAUGUUAACAUGUUAU  
A

>Guadeloupe\_mosquito\_viruses\_strain\_AP24\_segment1\_MT808027

CAAAAGACCCCGGCAUGUUUCUACUGCAUAAUGGCCAAGCUGGAGCUGGCACUUAUGU  
CAGUGAGAAAGCUAUGCCGGGAAGUUCUUUUGAGGUAGCUAAAGUCCUGCCUACUUC  
CAGGCUAUGGUAAUCGCAUCGUUAGAUGCCAUAUCUUAUCACGGUAUGGGCCAGUGUU  
ACUGGGUCGAUGAAGGCUUAGUGACAGCAGCCACGUGAUUGAGGGUUUUGAAUAUUU  
GUGUAUCUACAAGGACGAAGAGAAACGCAUCGAAGUAGGACCAAAAACAUCGAGACC  
GGAAAUGUGGAUUGCGCAGUAUGUCGUAAUCCCACACUGAUAAACGCAAAAUAUGGGU  
UGAGCAAAGCAAAGUUUGCGAGGCUGGCGGUCGAAAAAGAUGCCGGCUUGAGUGUUA  
CAUCACAGCCAUGGGAAAGAGAACGAUAGGAUUCUAGAUAGACAUCACAAUUUGGG

UAUGUUCGUUAUAGUGGAAGCACCAUUAAGGAUUUAGUGGAGCUCCUACU AUUUUG  
GCAGGACCAUAUUUGGAAUGCAUCUGGGGUCGGACUCUAAGAACCUUUCUUAUAAUGC  
UGCAUUCUUGAAAACUGAACUCAAGCCCAGUCGGGUUAUAAGAAACCAGUUAUUUA  
AGAACUGAAGAUAGUGCAAGUUUUCUAGAACUCCAGUCAGAGCGUCAAGAGUUCUAG  
AGAAGUCACGAUCUCCGUAAAUCCCGAUGAAUAUAAGGUUAGGAUUGGAGGGAUGUA  
UCAUAUUGUUGAUGAGGAAGUGUUGAGUACCGUCUUAAGAGAAGAUCCGCUAAGCGA  
GCACAGGGGGAUCUUCUCUUUAAGACUGAACAAGCUGAAGUUGGGCCCCUCAUUGAUC  
UCGAAGCUGUAACCACUAAGGGAGACCUUACUAGGUCUCAACAGAGUGGACAAAAACA  
GCACCAGGAGCUCUCUACUGAGACGGAUCCGAUAAUAGCUAUGACUAAAGGGCUAUUG  
UCAGAAUUUGGCAAAACCUCAGUGUACGGGAUUCCAUACGGCAGGUCUAAAGUUUCUG  
GGACAUGCACUAGUUGUGAGUCUUGUGGGCGCCUAUAUAUAUUGGGGGGAGUCUAGGGA  
UAUUCCUGAAACGCCUACUGCGGAUGCCAAGAAAGCGGAAGAUAUACCUUUAGCGCCU  
AGGAAUGCCAUGACGUUUAUGAUUCGGAAAACCUGAUCAGGGCUCCAGCUGUAGUUG  
UCGGGGCCCCGUGGCAUGGAAUAUCAGAGGGAAAGUGUACAGAACCACUACUUGCCAAA  
AUGCAAGAAAAUUGGCUUUCUUCUGCCAGAAGGCUUUGGCGAUCCGUCUUUUUGGAUCC  
CGUACAUUGACGCGUGCUCCGCUAAAAGAAGCUUCCGCACGCACUGUCAGAAACAAAA  
ACAGACGGAUGCGCCGCCAACAGCAGAAGAAAGAACUAGAGCAGUUCAAGCAGCUCU  
GGGACCUGCUCCGGAUGGAGGUGUGACCUCACAUCCGCAGCAGAUCCCCACAAAUGGU  
UUGAUAGGGAAUCAAUAAAGCACUAGAGGAGUGCUAUCUUGAUUUGGCUCCUCGCUA  
CUGUAUCUUGACUCUUUAGGCUCUACGAUUGCGCAAUCUUUGGUUGGAAUGGUUAU  
UGCUGUGAUCCGGAUAGAGUUAGUAUGGUACGAGAGCAUGUCAAAUUAAGGUUCAUG  
AGUUGUUGGCAGGUAAGGCUGUGAGCGAUUGUAUUAAGGUUUUUGUGAAGCAAGAGC  
CGCAUAAAAUGAAGAAGCCUCAGGAAGGUACUUAUCGCUCGAUAAGCGCUGUUAGCUU  
AAUUGAUACCUUUAUUGACAGAAUUUUGUUCGCUUGGAUAGCCAGAGCUCAGAUGGAU  
UCCGUCGGGGAGACGCCAUGUCUCAUCGGGUGGAGUCCAGCUAGAGGCGGAUGGCGUA  
AGAUAGUAAAUAGCUUUGCCAAACCAAGCAGUAAAUUGUUUAGAUCGAUCGGCUUGGG  
AUUGGACUGUACAAGGCUAUUUAAUGGAUCUUUGGAUAUUGUUUUUGGAAAAUUUAC  
CAGUGAAUCCUCCAGACUGGUGGCUAAAGAUGAUGAAACUACGUUUAAGCUACUGUU  
UUAAGAGGUUUGGUUUCAGUUCGAAGACGGAACAAGAGUAAAGCAGGCAACGCGAGGA  
GUAAUGAAGAGUGGUUGCUAUUUAAACUAUUUUGUUAUAAUCGUCUCAGCCAAAGUCUCU  
UACAUUACGUAGUCAACAGUCGAUGUGGGAAGCCCAUGACUAUGAAACAACCAUACUC  
GAUAGGUCAUCACACGGUACAGGAAGCUAUGGAUUGGUUCCUGUACCGUGUCAGUCAC  
CUCGAGAUAUUGGGAUACACGGUCAAAAGGAGCCAAAGUCCAGCAUUGGGUUCAAUUCG  
CGGGGUUCUGUUUCGACGGGAAAACUUGUUAUCCGACAUACAGGCUCAUUGAUCGUAC  
AAAACUGAUAACUACGCAAAGUCUCGACCUAACUACGAGCACUUAACAAAAUUCGUAC  
GUCAAUGAGCCUGUGAUGUACGAAUUUGUGUGUAGAGUGGCUCGUGAGUUAGGUCCUC  
GUUUCGUCUUGCCUAAGAUAGAAGCACUAGACAUAAUGAAUCAACCAAAUUGAUCCUA  
UGUCAAGUUCGCUUCUAUCUUAUGGCAAGCGAAACGGGAUAACUCGGCACUC

>Guadeloupe\_mosquito\_viruses\_strain\_AP24\_segment2\_MT808028

UUCUUACGCCUUUGGCCGUUCUAGCAGAAGCGAUGAAGGUUGCGGUUUGGCAACCUAA  
CGCUUCUGCUAAGAAACGGCGCAAUAGGCGCAAUAAGAAACGUGGAGGAGCCGCUGGC  
CCGAGCGGGGUUUCUGCUGAUGGACGUUUUACCGUUCAGAGAGCUGAGCUCCUGUUCG  
AGAUUAAGGUGGCCAAAGGUAGUUCUCCACGUCUUAUUAUGAAGCCUUGCAGCCGAC  
CUUAACUCGAAUGACGUGGCUAAACUCUCUGAGUGGUAGGUCCUCUCAGAUAAUUGG  
CAUUCCGCGAGACUAGAGUAUCGCCUUGCUGUGGGGGCGAUGAAAGAUGGCUCUCUAG  
UCGUCGGAGUCGACUGGGACCCUACGACGACCGUGCCUAGUAAAAGCAAGGUCCAAAG  
UUGUACUCCUAACUUUCAGGUCCCGGUAUGGCAGAAGAAGGAGUUGACUCUCCAGCG  
UCUCGGUUGCAGAGUCGUAAGUAUUAUGCUCUCUCAGAUUCAGGGGAUAUACCCAUGA

UAGACAAAGCCCCUUAUGGGGUUCAGAUGUCUCAAGUUGUUCCUCGAAUCCUUAUGA  
GGAACAGUACUUGGAGACAUCUGGAUCCACUAUAAGGUAACCCUGCAGGGGCCUAAA  
UAGGGAGACGAGACGCCCCCCCCCAUUAACCUCCAGGACCUAGUGUGUUUGAUUACCACA  
UGGUUCGGGAGGUAACCCUUAUGAAGUGCGGGCCAUUGUAAGAACUAAAUAUGAGCC  
CCAACAUAAACAGACUUCUGGAUAUUAUAAACCCUUGAGAUAUCCAGAUUGGCGAACAGG  
GAUAUGAUAAACGUAUGCAGCGGCGGCUGAGGUUUCAGUCAUUGGAACCGAUUUGACUA  
UUGAGGAUAAUUAUAGCGUUUCUCACGAUGAUUUCGAAAGUGGACAACGUGAGUGAAAU  
UCAAUGCGCUUCAAGACCCCCGACAUGGAAUGUUGAACCUGUAGGAUUGGUGCACAUAU  
GGUUUAUCUUUGAAAAGUCCGUUUUUUCCGAAGAUAGCGAUGUUUGAUUUUACGGUUC  
AUUUCGUGUCAAAUAGGAACAUAUUUUGUUCUAAGGCUCUUAAGAAGUGAACGUUGC  
UAUUUCUGAGAGCGCGAAGAUCAAGGUUAUUGGUCCUGUAAUGAAUCUUUUAACAAU  
UCAGCUCCUAGGAGCGAUAAUUGGUUCAUGAUAAAGUUUUGUCAGUUGAUAGAAAUCU  
UAGAUGCAACAGCGGUAAUAAAUGUUAACAUCGUCAUCAACCAAACCUAUGUGGAUUG  
GUUGAUGAGGAUGGUGACAUGGUGUUGGAUAUUAACGCCAAUAA

>Guadeloupe\_mosquito\_viruses\_strain\_AP27\_segment1\_MT808029

AUAGCUUUCUCACUGACAUAAGUGCCAGUGAGAAAGCUAUGCCGGGAAGUUCUUUUGA  
GGUAGCUAAAGUCCUGCCUACUUCCAUGGCGUGGUAAUGGCAUCGUUAGAUGGGAUU  
ACUUAUCACGUUAUGGGCCAGUGUUUCUGGGUCGAUGAAGGCUUAGUGACAGCAGCCC  
ACGUGAUUGAGGGUUUUGAAUAUUUGUGUAUCUACAAGGACGAAGAGAAACGCAUCGA  
AGUAGGACCAAAAACAUUCAAAACCCUCAUACAGUUUGCGCAGUAUUUUCGCAAUCCA  
ACACUGAUUUCGCAAAACUUUGCUUUGCUCAAACCCAAUUUUGCGAGGCUGGCGGCCG  
CAAAAGAUGCUGGCUUGAGUGUUAACAUCACAGCCAUGGGAAAGAGAACGAUAGGAUU  
CCUAGAUAGACAUCCACAUAUUUGGGUAUGUUCGUUAUAGUGGAAGCACCAUUAAGGA  
UUUAGUGGAGCUCCUACUAUUUUGGCAGGACCAUAUUUGGAAUGCAUCUGGGGUCGG  
ACUCUAAGAACCUUGGUUAUGAUGGAGCAUUCUUGAAAACUGAUCUCCAAAAUAGUAA  
GGCACUAAUGCUCCAAUUAUUUAGAACUGAAGAUAGUGCAAGUUUUCUAGAGCUC  
CAUUUAGACCUUCAUCAACAAAUACAUCCCUCCAUCCUCCGUUAUUAUCCUCGGGAU  
AUACGGUUAAGGAUUGGAGGGAUGUAUCAUAUUGUUGAUGAGGAAGUGUUGAGUACCG  
UCUUAAGAGAAGAUAUCCGCUAAGCGAGCACAGGGGGAUUUACAUAUUUGGCUGAACA  
AGCUGAAGUUGGGCCCCUCAUUGAUCUCGAAGCUGUAACCACUAAGGGAGACCUUACU  
AGGUCUCAACUUAUGUGGUUACAGCUUCGAGAUCAUGAGGGGGCCCAACUGAGACGGAUC  
CGAUAAUAGCUAUGACUAAAGGGCUAUUGUCAGAAUUUGGCAAAACCUAGUGUACGU  
UCCUCCAGAACCUAAGAGUAAAGACCAAGGGACAUGCACUAGUUGUGAGUCUUGUGGC  
GCCUAUAUAUAUUGGGGGGAGUCUAGGGAUUAUCCUGAAACGCCUACUGCGGAUGCCA  
AGAAAGCGGUACAUAUUACGCGUAGCUUCUUUAGCGGAGCACGCGUCAUUGUACGGGA  
AAACCUGAUCAGGGCUCCAGCUGUAGUUGUUGGGGGCCCGUGGCAUGGAAUAUCAGAGG  
GAAAGUGUACAGAGCCACGACUUGCCAAGAUGCAAGAAAAUGGAUUGCAUGUGCCAGA  
AACC UUUGGAGACCUGCCUUAUGGAAUCCCGCACAUAUGACGCGUGCUCCGCCAAAAGA  
AGCUUCCGCGCGCACUGUCAGAAACAAAAACAGACGGAUGCUCCACCUCAGCGGAAG  
AGGUCCGUAGAGCUGCUAAACUGCUCUACGGUGCUAUUCCAUAUCUAUCUCCUCUAG  
UGCAUUUAUUGAAUUCCCUAUCAAACCAUUUGAUGGGGAAUUCAAUAAAGCACUAGAG  
GAGAUAGAUUAGGAUAGCACUCCUGGCUACUGUUUUUUGACUCUUUUAGGCUCUACGA  
AUGCGCAAUUCUUUGGUUGGAAUGGUUAUAGCUGUGAUCCGGAUAGAGUUAGUAUGG  
UACGAGAGCAUGUCAAAUUAAGGUUCAUAGAGUUGUUGGCAGGUAAGGCUGUGAGCGA  
UUGUAUUAAAGGUUUUUGUGAAGCAAGAGCCGCAUAAAUGAAGAAAAUUCAGGAAGG  
UACUUAUCAAGCGAUAAAGUACCUUCCUGAAUUUUCUUCAAACCUCUUCAAACAGUAGC  
UUGAUAGUUUCAUCAGCCAGAGCUCAGAUGGAUUCGUGCGGGGAGACGCCAUGUCUCA  
UCGGGUGGAGUCCAGUUAGAGGGCGGAUGGCGUAAGAUAGUGAACAGGUUUGGCAACCA

AGCAGUAAAUUGUUUAGAUAGAUCGGCUUGGGAUUGGACUGUACAAGGCUAUUUAAU  
UGAUCUUUGGAUAUUGUUUUUGGAAAAUUUACCAGUGAAUCCUCCAGACUGGUGGCUU  
AAGAUGAUGAAACUACGUUUUAAGCUACUGUUUGAAGAGGUUUGGUUUCAGUUCGAA  
GACGGGACAAGAGUAAAGCAGGCAACGCGAGGAGUAAUGAAGAGUGGUUGCUAUUUAA  
CUAUUUUGUUAAAUAGUCUCAGCCAAAGUCUCUACAUAUACGUAGUCAACAGUAGAUG  
UGGGAAGCCCAUGACUAUGAAACAACCAUACUCGAUAGGUGAUGACACGGUACAGGAA  
GCUAUGGAUUGUUUCAUACUCAUCGUUAGACAACUCGAGCGAGUGGGAAUCACGGUCA  
AAGGAGCGAAAGUGCAGCAUUGGGUGGAAUUGGCGGGGAUCUGUUUUGACGGGAAAAC  
UUGUUAUCCGGCAUACUGGCAAAAACAUCUUUUUAACCUUAAGUAUACGCAAAAUCUU  
GACCUAACUCACGAUCUACACACAAAUUCGUACGUCAAUGAGCCUGUGAUGUACGAAU  
UUGUGUGUAGAGUGGCUCGUGAGUUAGGUCCUCGUUUCGUCUUGCCUAAGAUAGAAGC  
ACUAGACAUAAUGAAUCAACCAAAUUGGUUCAUUAUGUCUAGUGCUUCUAUCUUAUCU  
UGGGCAAGACGAAACGAGGACCUAACUCACGAGCCA

>Guadeloupe\_mosquito\_viruses\_strain\_AP27\_segment2\_MT808030

UAUUAUGCUCUCUCAGAUUCAGGGGAUAUACCCAUGUAUCCGAGAGAGCACGAUACUU  
ACGACUCCGCAACCUAACGCUUCUGCUAAGAACC GGCGCAAUGGGCGCAAUAAGAAAC  
GCGGAGGAGCCGCUGGCCCGAGCGGGGUUUCUGCUGAUGGACGUAAUACCGUUCAGAG  
AGCUGAGCUCCUGUUCGAGAUUAAGGUGGCCAAAGGUAGUUCUCCACGUCUUAUUAU  
GAAGCCUUGCAGCCGACCUCGACCCGAAUGCCGUGGCAAAUACUCUGAGAGAAACUA  
CCACUCAGAUAAUUGGCAUUCGCGAGACUAGAGUAUCGCCCUGCUGUGGGGGCGAU  
GAAAGAUGGCUCUCUAGUCGUCGGAGUCGACUGGGACCCUACGACGACCGUGCCUAGU  
AAAAGCAAGGUCCAAAGUUGUACUCCUAACUUUCAGGUCCCGGU AUGGCAGAAGAAGG  
AGUUGACUCUCCAGCGUCUCGGUUGCAGAGUCGAAGUU AUUCUGCCAUCCCAGAUUC  
AGGGGGUAUAUUUAGGCCCCGCAGGGUCCUUAUAGUGGAUCCAGAU GUCUGUACUGU  
UCCUCGAAUAAGGAUGAGGAACAGUACUUUGGAGACAUCUGGAUCCACUAUAAGGUAA  
CCCUGCAGGGGCCUAAAUAAGGGAGACGAGACGCCCCCCCCCAUUACCUC CAGGACC UAGU  
GUGUUUGAUUACCACAUGGUCCGGGAGGUGACCCUAUAUGAAGUGCGGGCCA UUGUAA  
GAACUAAAUAUGAGCCCCAACAUAAACAGACUUCUGGAUAUUAUAAACCUUUUGAGAU  
CCAGAUUGGCGAACAGGGAU AUGAUAAACGU AUGCAGCGUCGGCCGACUUCGAAUCAUC  
GUGAGAAACGCUAUAAUUAUUGUCGAUAGUUAUAGCGUUUCUCACGAUGAUUCGAAAG  
UGGACAACGUGAGUGAAAUCAAUGCGCUUCGAGACCCCCGACAUGGAAUGUUGAACC  
UGUAGGAUUGGUGCACA UUGGUUU AUUCUUUGAAAAGUCCGU AUUUUCCGAUCAUCGCG  
AUCUCAGAAAUAAGCAGUUCACUUCUUUAAGAGCCUUAGGAACAAAGAU GUUCCUAAGG  
CUCUUAAAGAAGUGAACGUUGC UAUUUCUGAGAGCGCGAAGAUCAAGGUUAUUGGUCC  
UGUAAUGAAUCUUUCAAUAGUCAAGCUCCUAGGAGCGAUAAUUGGUUCAUGAUAAAG  
UUUUGUCAGUUGAUAGAAAUCUUAGA UCCAACAGCGGUAAUAAAUGUUAACAUCGUCA  
UCAACCAAUCCUCAUAUGGAUUGGUUGAUGACGAUGUUAACA UUAUUAACCGCUGUUG  
GAUCUAAGA

>Guadeloupe\_mosquito\_viruses\_strain\_AP29\_segment1\_MT808031

CUUUGUUUGCUCAAACCCAUUUUUGGUUAUCAGUUUUGGAUUACGCAGUAUGUCGCCA  
AUCCAACGACUGAUAAACGCAAAAAUUGGGUUUGAGCAAAGCAAAGUUUGCGAGGCUGG  
CGGUCGAAAAAGAUGCCGGCUUGAGUGUUAACAUCACAGCCAUGGGAAAGAGAACGAU  
AGGAUUCCUAGAUAGACA UCCACAAUUGGGUAUGUUCGUUAUAGUGGAAGCACCAU  
AAAGGAUUUAGUGGAGCUCCUACUAUUUUGGCAGGACCAUAUUUGGAAUGCAUCUGG  
GAUCCUAUUCUAUGGUCCUGAAAUGUAAGGAGCUCCACCAGAAAACUGAACUCAAGCC  
CAGUCGGGUUAUAAGAAACCAGUUAUUUAAGAACUGAAGAUAGUGCAAGUUUUCUA  
GAGCAGCAGUUAAGAGCGUUAUGAAGAAGUAGAGUAUUCUAGAUCUCCGUAAUAUCCCG

AUGAAUAUAAGGUUAGGAUUGGAGGGAUGUAUCAUAUUGUUGAUGAGGAAGUGUUGA  
GUACCGUCUUAAGAGAGAAGAUCCGCUAAGCGAGCACAGGGGGAUUUACAAUAUUUGGC  
UGAACAAAGCUGAAGUUGGGCCCCUCAUUGAUCUCGAAGCUGUAACCACUAAGGGAGAC  
CUUACUAGGUCUCAACAGAGUGGACAAAAACAGCACCAGGAGCUUUCUACUGAGACGG  
AUCCGAUAAUAGCUAUGACUAAAGGGGCUAUUGUCAGAAUUUGGCAAAACCUCAGUGUA  
CGUUCCUCCAGAACCUAAGAGUAAAAGACCAAGGGACAUGCACUAGUUGUGAGUCUUGU  
GGCGCCUAUAUAUAUUGGGGGGAGUCUAGGGAUAUUCCUGAAACGCCUACUGCGGAUG  
CCAAGAAAGCGGAAGAUUUACCUUUAGUGCCGAGGGGAUGCUAUGACGUUUAAUGAUUC  
GGAAAACCUGAUCAGGGCUCCAGCUGUAGUUGUUGGGGCCCCGUGGCAUGGAAUAUCAG  
AGGGAAAGUGUACAGAGCCACGACUUGCCAAGAUGCAAGAAAAUGGAUUGCAUGUGCC  
AGAAACCUUUGGAGACCUGCCUUAUGGAAUCCCGUACAUUGACGCGUGCUCGCCCAA  
AGAAGCUUCCGCACGCACUGUCAGAAACAAAAACAGACGGAUGCGCCGCCAACAGCAG  
AAGAAAGAACUAGAGCAGUUCAAGCAGCUCUACGGACCUAUUCCGCAUGGAGGUGUGA  
CCUUAACAUCCGCAGCAGAUCCCCACAAAUGGUUUGACAGGGAGUUCAAUAAAGCACUA  
GAGGAGAUAGAUUUGGAUAGCACUCCUGGCUACUGUAUUUUGACUCUUUAGGCUCUA  
CGAAUGCGCAAAUCUUUGGUUGGAAUGGUUAUUGCUGUGAUCCGGAUAGAGUUAGUAU  
GGUACGAGAGCAUGUCAAAUUAAGGUUCAUAGAGUUGUUGGCAGCUUCGUCUAUAAUC  
UAUCGGAUCAAGAUUUUGUGAAGCAAGAGCUGCAUCCAACGAACAAAAUUCUGUCA  
AAGGUACUUAUCGCUUGAUUAGCGCUGUUAAGCUUAAUUGAUACCUUUAUUGACAGAAU  
UUUGUUCGCUUGGAUAGCCAGAGCUCAGAUUGGAUUCCGUCGGGGAGACGCCAUGUCUC  
AUCGGGUGGAGUCCAGUUAGAGGCGGAUGGCGUAAGAUAGUGAACAGGUUUGGCAACC  
AAGCAGUAAAUUGUUUAGAUAGAUCCGGCUUGGGAUUGGACUGUACAAGGCUAUUUAA  
UUGAUCUUUGGAUUAUGUUUUUGGAAAAUUUACCAGUGAAUCCUCCAGACUGGUGGCU  
UAAGAUGAUGAAACUACGUUUUAAGCUACUGUUUGAAGAGGUUUGGUUUCAGUUCGA  
AGACGGGACAAGAGUAAAGCAGGCAACGCGAGGAGUAAUGAAGAGUGGUUGCUAUUUA  
ACUAAUUUGUAAAUAAGUCUCAGCCAAAGUCUCUUAACAUUACGUAGUCAACAGUAGUU  
GUGGGAAGCUCUAGACUAUGAAACAACCAUACCAGAUAGGUGAUGACACGGUACAGGA  
AGCUAUGGAGUAUGGCUUGUUUUUAUACUACGUUAAGCAACUCGAGAUUUGGGAAUCA  
CGGUCAAAGGAGCUAAAGUCCAGCAUUGGGUUGAAUUCGCGGGGUUCUGUUUUGACGG  
GAAAACUUGUUAUCCGGCAUACUGGCAAAAACAUCUUUUUAACCUUAAGUAUACGCAA  
AAUCUUGGGGAGACUUUGCGUAGUCUACACACAAAUUCGUACAUCACAGAGCUCAUUG  
ACGUACGAUUUGUGUGUAGAGUGGCUCGUGAGUUAGGUCCUCGUUUCGUCUUGCCUA  
AGAUAGAAGCACUUGACAUAAGGAAUCAACCAAUUGAUUCACUAUGUCAAGUUCGCU  
UCUAUCUUAUGGCAAGACGAAACG

>Guadeloupe\_mosquito\_viruses\_strain\_AP29\_segment2\_MT808032

UAUCUCAAGCAGCGGAAUCCACCUUUUAUUGUCUACACACCAGCGCUCGGGCCAGCGGC  
UCCUCCACGUCUUCUGCUAAGAAACGGCGCAAUAGGCGCAAUAAGAAACGUGGAGGA  
GCCGCUGGCCCCGAGCGGGGUUCUGCUGAUGGACGUUUUACCGUUCAGAGAGCUGAGC  
UCCUGUUCGAGAUUAAGGUGGCCAAAGGUAGUUCUCCACGUCUUAUUUGAAGCCUU  
GCAGCCGACCUCGACUCGAAUGACGUGGCUAAAGACUCUGGGCGAUACUUACUCUCGG  
AUAAUUUGGCAUUCGCGAGACUAGAGUAUCGCCCUGCUGUGGGGGGCGAUGAAAGAUG  
GCUCUCUAGUCGUCGGAGUCGACUGGGACCCUACGACGACCGUGCCUAGUAAAAGCAA  
GGUCCAAAGUUGUACUCCUAAACUUUCAGGUCCCCGUUUGGCAGCAUAAGUACUUGACU  
CUGCAACCGAGACGCUGGGAGAGUCGUAAGUAUUUAGCUCUCUCAGAUUCAGGGGAUA  
UACCAUGAUAGACAAAGCCCCUUGUGAGGUUUUUGGCCUAAUUGGCUUGUUCUCGAA  
UAAGGAUGAGGAACAGUACUUUGGAGACAUCUGGAUCCACUAUAAGGUAACCCUGCAG  
GGGCCUAAAUAGGGAGUCCAGAUGCUAUCCAAAGUACCUCAGGACCUAGUGUGUUUG  
AUUAUCACAUGGUUCGGGAGGUAAACCUUAUAUGAAGUGCGGGCCAUUGUAAGAACUAA

AUAUGAGCCCCAACAUAAACAGACUUCUGGAUAUUAUAAACCCUUUGAGAUC CAGAUG  
GCGAACAGGGAUUAUGAUAAACGU AUGCAGCGGCGGCUGAGGUUUUAGUCA AUGGAACCG  
AUUUAACUAUUGAGGAUAAUUAUAGCGUUCUCACGAUGAUUCGAAAGUGGACAACGU  
GAGCGAAAUUC AAUGCGCUUCGAGACCCCCGACAUGGAAUGUUGAACCU GUAGGAUUG  
GUGCACAUUGGUUUAUCUUGAAAAGUCCGU AUUUUCCAAAGAUAGCGAUGUUGAUU  
UUACGGUUC AUUUCGUGUCGAAUAGGAACGUUCACUUCUUUAAACGCCU UAGGAACAA  
AGUUGUUCCUAUUUGUCACGAAUGAACCGUAAAAUCUCUGAU AUUGAAAAGAUUCAG  
GUUAUCGGUACUGUAAUGAAUCUUUUCAAUAGUCAAGCUCCUAGGAGCGAUAAUUGGU  
UCAUGAUAAAGUUUUGUCAGUUGAUAGAAAUCUUAGA UCCAACAGCGGUAAUAAAUGU  
UAACAUCGUCAUCAACCAAACCU AUGUGGAUUGCGAUGAUGAGGAUGGUGACAUGGUG  
UUAGCGAUCUUAAGA UUCUAU

>Guadeloupe\_mosquito\_viruses\_strain\_AP30\_segment1\_MT808033

CAUAGCUUUCUACUGCAUAAGUGCCAAGCUCCAGCUGGCACUUAUGUCAGUGAGAAAG  
CUAUGCCGGGAAGUUCUUUUGAGGUAGCUAAAGUCCUGCCUACUUUCCAGGCUAUGGU  
AAUGCCAUCGUUAGAUGCCAUAACUUAUCACGUCAUGGGCCAGUGUUUCUGGGUCGAU  
GAAGGCUUAGUGACAGCAGCCCACGUGAUUGAGGGUUUUGAAU AUUUGUGUAUCUACA  
AGGACGAAGAGAAACGCAUCGAAGUAGGACCAAAAACAUUCAAAACCCUCA AUGGGGA  
UUGCGCAGUAAGUCGUAAUCCAACACUGAUAAACGCAAAA AUUGGGUUUGAGCAAAGCA  
AAGUUUGCGAGGCUGGCGGUCGAAAAAGAUGCCGGCUUGAGUGUUAACAUCACAGCCA  
UGGGAAAGAGAACGAUAGGAUCCUAGAUAGACA UCCACAAUUUGGGUAUGUUCGUUA  
UAGUGGAAGCACCAUUAAGGAUUUAGUGGAGCUCCUUA CUAUUUUGGCAGGACCAUA  
UUUGGAAUGCAUCUGGGGUCGGACUCUAAGAACCUUGGCACUGAUGCUUCAUUCUUGA  
AAACUGAACUCAAGCCCAGUCGGGUUAUAAGAAACCAGUUA AAUUAAGAACUGAAGA  
UAGUGCAAGUUUUCUAGAGCAGCAGUUAAGAGCGUUAUGAAGAAGUAGAGUAUUCUAG  
AUCUCCGUAUAAUCCCGAUGAAUAUAAGGUUAGGAUUGGAGGGAUGUAUCAUAUUGUU  
GAUGAGGAAGUGUUGAGUACCGUCUUAAGAGAGAAGAUCCGCUAAGCGAGCACAGGGGG  
AUUUACAAUAUUUGGCUGAACAAAGCUGAAGUUGGGCCCCUCAUUGAUCUCGAAGCUGU  
AACCACUAAGGGGAGACGUGACUAGGUCUCUACAGAGUGGACAAAAACAGCACCAGGAG  
CUUUCUACUGAGACGGAUCCGAUAAUAGCUAUGACUAAAGGGCUAUUGUCAGAAUUUG  
GCAAAACCUCAGUGUACGUUCCUCCAGAACCUAAGAGUAAAGACCAAGGGACAUGCAC  
UAGUUGUGAGUCUUGUGGCGCCUAUAUAUAUUGGGGGGCGUCUAGAGAUAUUCCUGAA  
ACGCCUACUGCGGAUGCCAAGAAAGCGGAAGAUUUACCUUUAGCGCCUAGGAAUGCCA  
UGACGUUUAAUGAUUCGAAAACCUGAUCAGGGCUCCAGCUGUAGUUGUUGGGGGCCCG  
UGGCAUGGAACAUCAGAGCGCAAGCGUACACACCCACCACUUGCCAAGAUGCAACAAA  
AUCGAUUGCAUGUGCCAGAAACCUUUGGAGACCUGCCUUAUGGACUCCCGUACA UUGA  
CGCGUGCUC CGCCAAAAGAAGCUUCCGCACGCACUGUCAGAAACAAAAACAGACGGAU  
GCGCCGCCAACAGCAGAAGAAAGACUAGAGCAGUUCAAGCAGCUCUACGGACCUAUU  
CCGCAUGGAGGUGUGACCUUACA UCCGCAGCAGAUCCCCACAAAUGGUUUUGACAGGGA  
AUUCAAUAAAGCACUAGAGGAGAUAGAU AUGGAUAGCACUCCUGUCUACUGUAAUUUG  
ACUCUUAUAGGUACUACGAAUGCGCGAAUCUUUGGUUCGAAUGGUUAUAUGCUGUGAUC  
CGGAUAGAGUUAGUAUGGUACGAGAGCAUGUCAAAUUAAGGUUCA AUGAGUUGUUGG  
CAGGUAAGGCUGUGAGCGAUUGUAUUUAGGUUUUUGUGAAGCAAGAGCCGCAUAAAAU  
GAAGAAAAUUCAGGAAGGUACUUAUCGCUUGAUAAAGUACCGUUAAGCUGGAUUGUUCGC  
UUGAUAGCCAGAAGAUGGUUCGCGGGGAGAGCCAGCUCUCGGGUGGAGUCCGUCGAGG  
AGACGCCAUGUCUCAUCGGGUGGAGUCCAGUUAGAGGCGGAUGGCGUAAGAUAGUGAA  
CAGGUUUGGCAACCAAGCAGUAAA UUGUUUAGAUAGAUCCGGCUUGGGAUUGGACUGUA  
CUAUCUUAACGUAGUUGAUCUUUGGAUAUUGUUUUUGGAAAAUUUACAAACCAAACCU C  
CAGACUGGUGGCUUAAGAUGAUGAAACUACGUUUUAAGCUACUGUUUGAAGAGGUUUG

GUUUCAGUUCGAAGACGGGACAAGAGUAAAGCAGGCAACGCGAGGAGUAAUGAAGAGU  
GGUUGCUAUUUAAACUAUUUUGUUAAAUAAGUCUCAGCCAAAGUCUCUUAUACUAG  
UCAACAGUAGAUGUGGGAAGCCCAUGACUAUGAAACAACCAUACUCGAUAGGUGAUGA  
CACGGUACAGGAAGCUAUGGAUUGGUUGUUUCUAGACUACGUUAGACAACUCGAGAU  
UUGGGAAUCACGGUCAAGGAGCUAAAGUCCAGCAUUGGGUUGAGUUCGCGGGGUUCU  
GCUUUGACGGAAAAAGAUGUUUCCAGUAUACAGGCUCAUUGAUCGUACAAAACUGAU  
AACUACGCAAAGUCUCCCCGGAGACUUUGCGUAGUUAUCAGUAUUUGUACGUCAAUGAG  
CCUGUGAUGUACGAAUUUGUGUGUAGAGUGGCUCGUGAGUUAGGUCCUCGUUUCGUCU  
UGCCUAAGAUAGAAGCACUAGACAUAAUGAAUCAACCAAUUGAUCCUAUGUCAAGUU  
CUCUUCUAUCUAAUGGUGAGUGAAACGGGAUGAGUUUGGCAAACAAUAGUGGGA

>Guadeloupe\_mosquito\_viruses\_strain\_AP30\_segment2\_MT808034

ACCCCUUUAACUGCUCAAGUAGCUGCGAUGAAGGUUGCUAAACCGCAACCAAACGCUU  
CUGCUAAGAAAGGGCGCAAUAGGCGCAAUAAGAAACGGGGAGGAGCCUCUAGUCCGAG  
CGGUGUGUCUGCUGAUGGACGUAAUACCGUUCAGAGAGCUGAGCUCUGUUCGAGAUU  
AAGGUGGCCAAAGGUAGUUCUCCACGUCUUAUUUGAAGCCUUGCAGCCGACCUCGA  
CCCGAAUGACGUGGCUAAAGACUUUGGGUGGUAGUUUCUCUCAUAUAAUGUGGCAUUC  
CGCGAGACUAGAGUAUCGCCCUGCUGUGGCGGCGAUGAAACAUGGCUCUCUAGUCGUC  
GGAGUCGACUGGGACCCUACGACGACCGUGCCUAGUAAAAGGAAGGUACAAAGUUGUA  
CUCCCAACUUUCAGGUCCCGGUAUCUGAGAAGAAAUACUUGACUCUGCAACCGUGUCG  
GUUGCAGAGUCGUAAGUAUUAUGCUCUCUCAGAUUCAGGGGAUAUACCCAUGAUAGAC  
AAAGCCCCUUGUGAGGUUUUGGCCUUAUUUGGCUUGUUCUCGAAUAAGGAUGAGGAAC  
AGUACUUUGGAGACAUCUGGAUCCACUAUAAGGUAACCCUGCAGGGGGCCUAAAUAGGG  
AGACGAGACGCCCCCCCCCAUUACCUCCAGGACCUAGUGUGUUUGAUUACCACAUGGUUC  
GGGAGGUAACCCUAUAUGAAGUGCGGGCCAUAUGUAAGAACUAAAUAUGAGCCCCAACA  
UAAACAGACUUCUGGAUAUUAUAAACCCUUGAGAUCCAGAUUGGCGAACAGGGGAUAUG  
AUAACGUAUGCAGCGGCGGCUGAGGUUUUAGUCAAUUGGAACCGAUUUUACUAUUGGGG  
GUAAUAAGAGCGUUCUCAAGUUGAUUCCACUUUGAACAUUGUGAUUGAAAUUCAAUG  
CGCUUCAAGACCCCCGAAAACCAAUGUUGAACCUUGAGGAUUGGUGCACAUUGGUUUA  
UCUUUGAAAAGUCCGUUUUUCCGAAGAUAGCGAUGUUUGAUUUUACGGUUCAUUUCG  
UGUCAAAUAGGAACAUUUUUGUUCUACGGCACUUAAGGAAGUGAACGUAGCGAUUUC  
UAUGAACGCGAAAAUCAACAUCGCUAUUUCUAUAAUGAAUUUUCAUGACAAUUCAGCU  
CCUAGGAGCGAUAAUUGGUUCAAGAUUAAGUUUUGUCAGUUGUUGGAAAUCUUGGAUC  
CAACAGCGGUAAUAAAUGUUAACAUCGUCAUCAACCAAACCUAUGUGGAUUGGUUGAU  
GGCGCAUCAUUAUUGGAUUAUACGCCAAUAAUUAACGUUCUAUAACUCUGUC  
ACGUCUCUGUUGCACUUUAGGGAGGGGGAGGGUGAGAGUUCGCGAGCGAACAGUAGCG  
AGUCGCUUGAAAGUUAUGAGGAUCCCCAUCCUCAAGUGUUUUUAAAGCGAUGAGUUUCA  
AGUUGUGGACCACUAUUAGUUUGCCAACGUGUCGUUAAGUGCUCGACAGUAACUAAUA  
UUGGUCCUGUACACUGAAUCUUUCAAUAGUCAAGCUCCUAGGAGCGAUAAUUGGUUC  
AUGAUAAAGUUUUGUCAGUUGAUAGAAAUCUAGAUCCAACAGCGGUAAUAAAUGUU  
AACAU

>Guadeloupe\_mosquito\_viruses\_strain\_AP33\_segment1\_MT808035

CCCAUCUAAACGAUGCCAUAUACAUAGCCUGGAAAUUAGGCAGGACUUUAGCUACCUCAA  
AAGAACUUCGCGGGGAAASGAGCAUAGCUUUCUCACUGUACAUAAUGGCCAAGCUGGA  
GCUGGCACUUAUGUCAGUGAGAAAGCUAUGCCGGGAAGUUCUUUUGAGGUAGCUAAAG  
UCCUGCCUACUUUCCAGGCUAUGGUAAUGGCAUCGUUAGAUGGGAUUACUUAUCACGU  
UAUGGGCCAGUGUUUCUGGGUCGAUGAAGGCUUAGUGACAGCAGCCCACGUGAUUGAG  
GGUUUUGAAUAUUUGUGUAUCUACAAGGAUGAAGAGAAACGCAUCGAAGUAGGACCAA

AAACAUUCAAAACCCUCAUACACGUGGGCUGCUCACUAAGCCGUAAUCCAACACUCAA  
GCCGGCAUCUUUUUCGUUCUGCCAAGCAAAGGUUUCUUAUAACCCGACUGGGCUUGAG  
UUCAGUUUGAAUGCUCACAUCACAGCCAUGGGAAAGAGAACGAUAGGAUUCUAGAU  
GACAUCCACAAUUUGGGUAUGUUCGUUAUAGUGGAAGCACCAUUAAGGAUUUAGUGG  
AGCUCCUACUAUUUUGGCAGGACCAUAUUUGGAAUGCAUCUGGGGUCGGACUCUAAG  
AACCUUGGUUAUGAUGGAGCAUUCUUGAAAACUGAACUCAAGCCCAGUCGGGUUAUAA  
GAAACCAGAUACAUCUWAGAACUGAAGAUAGUGCAAGUUUUCUAGAGCAGCAGUUAGA  
GCGUUAUGAAGAAGUAGAGUAUUCUAGAUCUCCGUAAUAAUCCCGAUGAAUUAAGGUU  
AGGAUUGGAGGGGAUGUAUCGCAGGGUUAUGAAGAAGUAGAGUAUAUCUCCGUAAAG  
AGAAGAUCCGCUAAGCGAGCACAGGGGGGAUCUUCUCUUUAAGACUGUACAAGCUGAAG  
UUGGGCCCCUCAUUGAUCUCGAAGCUGUAACCACUAAGGGAGACCUUACUAGGUCUCA  
ACAGAGUGGACAAAAACAGCACCAGGAGCUUUCUACUGAGACGGAUCCGAUAAUAGCU  
AUGACUAAAGGGCUAUUGUCAGAAUUUGGCCAAAACCUCAGUGUACGUUCCUCCAGAAC  
CUAAGAGUAAAGACCAAGGGACAUGCACUAGUUGUGAGUCUUGUGGGCGCCUAUUAUA  
UUGGGGGGAGUCUAGGGAUAUUCUGCAACAACUACAGCUGGAGCCCUGAUCGCGGAA  
GAUUUACCUUUAGCGCCUAGGAAUGCCAUGACGUUUAUGAUUCGGAAAACCUGAUC  
GGGCUCCAGCUGUAGUUGUUGGGGGCCGUGGCAUGGAAUAUCAGAGGGAAAGUGUACA  
GAGCCACGACUUGCGGAGAUGCGUCAAUGUACGGGAUUGCAUAAGGCAGGUCUCUUUA  
GGUUUCUGCCAUAUGCAAUCCCGUACAUAUGACGCGUGCUCCGCUAAAAGAAGCUUCCG  
CACGCACUGUCAGAAACAAAAACAGACGGAUGCGCCGCCAACAGCAGAAGAAAGACU  
AGAGCAGUUCAAGCAGCUCUACUUCUUUCUUCCGCUUGGAGGUGCGACCUCACAUUCG  
CUGCAGAUCCCCACAUUCGUAGAGCUAAAAGAGUCAAUAAAGCACUAGAGGAGAUAGA  
UAUGGAUAGCACUCCUGGCUACUGUAUUUUGACUCUUUUAGGCUCUACGAAUGCGCAA  
AUCUUCGGCUGGAAUGUGAUUAGCUGUGAUCCGGAUAGAGUUAGUAUGGUACGAGAGC  
AUGUCAAAUUAAGGUUCAUUGAGUUGUUGGCAGGUAAGGCUGUGAGCGAUUGUAUUA  
AGGUUUUUGUGCAGCAAGAGCUUCAUAAAUGAAGAAAAUUCAGGAAGGUACUUUUCG  
CUUGAUAAAGCGCUGUAAGCUUAAUUGAUACCUUUUUGACAGAAUUUUGUUCGCUUGG  
AUAGCCAGAGCUCAGAUGGAUUCGUCGGGGAGACGCCAUGUCUCAUCGGGUGGAGUC  
CAGUUAGAGGCGGAUGGCGUCAGAUACGGAAUCCAUCUGAGCUCAAGCUAGUCAAUUG  
UUUAGACAGAUACGCUUGGAAUUGGACUGUACAAGGCUAUUUAUUUGAUCUUAGGACA  
UCGUUUCUGGAAAAUUUACCAGUGAAUCCUCCAGACUGGUGGCUUAGAUGAUGAAUC  
UACAUUUUAAGCUACUGUUUGAAGAGGUUUGGUUUCAGUUCGAAGACGGAACAAGAGU  
AAAGCAGGCAACGCGAGGAGUAAUGAAGAGUGGUUGCUAUUAUACUAUUUUGUUAAA  
UAGUCUUAGCCAAAGUCUCUUAACAUUACGUAGUCAACAGUAGAUGUGGGAAGCCCAUG  
ACCAUGAAACAACCAUACUCGAUAGGUGAUGACACGGUACAUGAGCUAUCGGAUUCCC  
UUCUAGACUAUGUUAGACAACUCGAGAUUUUGGGAAUCACGGUCAAAAGGAGCUAAAGU  
CCAGCAUUGGGUUGAAUUUGCGGGGUUCUGUUUUGACGGGAAAACUUGUUUACCGGUC  
AAAACAGAACCCCGCAAUUCUUAAGGCAAGACGAAACGAGGACCGAACUCACGA  
GCCACUCUACACAUUCGUACGUCAAUGAGCCUGUGAUGUACGAAUUUGUGUGUAGAGU  
GGCUCGUGAGUUAGGUCCUCGUUUCGUCUUGCCUAAGAUAGAAGCACUAGACAUAAUG  
AAUCAACCAAUUGAUCCUAUGUCUAGUGCUUCUAUCUUAGGCAAGACGAAACGAGGA  
CCUAACUCACGAGCCACUCUACACACAAAUUCGUACAUA

>Guadeloupe\_mosquito\_viruses\_strain\_AP35\_segment1\_MT808036

GGCACUGACACUAAUGCCAGUGAGAAAGCUAUGCCGGGAAGUUCUUUUGAGGUAGCUA  
AAGUCCUGCCUACUUUCCAGGCUAUGGUAAUGGCAUCGUUAGAUGGGAUUACUUAUCA  
CGUUAUGGGGCCAGUGUUUCUGGGUCGAUGAAGGCUUAGUGACAGCAGCCCAUAACGUG  
AUUGAGGGGUUUUGAAUAUUUGUGUAUCUACAAGGACGAAGAGAAACGCAUCGAAGUA  
GGACCAAAAACAUCGAGAUCCGGCAAUGGGGAUUACGCAGUAUGUCGCAAUCCACCAU

UGCCGACUCGAAUCUUUGGUUUGCUCAAAGCCCAAUUUUUGCGUUAUGCAGUCGAACU  
UGAGUUCAGUUUGAGUGUUAACAUCAUAGCCAUGGGAAAGAGAACGAUAGGAUUCCUA  
GAUAGACAUCCACAAUUUGGGUAUGUUCGUUAUAGUGGAAGCACCAUUAAGGAUUUA  
GUGGAGCUCCUUAUAUUUUGGCAGGACCAUAUUUGGAAUGCAUCUGGGGUCGGACUC  
UAAGAACCUUGGUUAUGAUGGAGCAUUCUUGAAAACUGAACUCAAGCCCAGUCGGGUU  
AUAAGAAUGCUCCAGUCAAAACCAAGGUUCUAGAGUCCGACGCCAGUUUUCUAGAGC  
AGCAGUUAGAGCGUUCUUCAAAAUACAGUCCUCCAGAUCCCCGUUAUUAUCCCGAUGA  
AUUAUAGGUUAGGAUUGGAGGGAUGUAUCAUAUUGUUGAUGAGGAAGUGUUGAGUAC  
CGUCUUAAGAGAGAAGAUCCGCUAAGCGAGCACAGGGGGGAUUUACAAUUUUUGACGGUA  
CAAGCUGAAGUUGGGCCCCUCAUUGAUCUCGAAGCUGUAACCACUAAGGGGCGACCUUA  
CUAGGUCUCAACAGAGUGGACAAAAACAGCACCAGGAGCUUUCUACUGAGACGGAUCC  
GAUAAUCUCCAUGACUACUGUCUAUUGUCAGAAUUUUGCAAACCUCAGUGUACGUU  
CCUCCAGAACCUAAGAGUAAAGACCAAGGGACAUGCACUAGUUGUGAGUCUUGUGGCG  
CCUAUAUAUAUUGGGGGGAGUCUAGGGAUAUUCCUGAAACGCCUACUGCGGAUGCCAA  
GAAAGCGGAAGAUUUACCUUUAGCGCCUAGGAUUGCCAUGACGUUUAAUGAUUCGGAA  
AACCUGAUCAGGGCUCCAGCUGUAGUUGUUGGGGGCCCGUGGCAUGGAAUAUCAGAGGC  
AAAGUGUACAGAACCACUGGCGCUGGCGACGAUGCAAGAAAAUGGAUUGCAUGUGCCA  
GAAACCUUUGGAGACCUGCCUUAUGGAAUCCCGUACAUAUGACGCGUGCUCCGCCAAAA  
GAAGCUUCCGCACGCACUGUCAGAAACAAAAACAGACGGAUGCGCCGCCAACAGCAGA  
AGAAAGAACUAGAGCAGUUCAAGCAGCUCUACGGACCUAUUCCGCAUGGAGGUGUGAC  
CUCACAUCCGCAGCAGAUCCCCACAAAUGGUUUGAUAGGGAAUUCAAUAAAGCACUAG  
AGGAGAUAGAUUGGAUAGCACUCCUGGCUACUGUAUUUUGACAAAUAAGUAGCCAG  
GAAGACGCAAUCUUUGGUUCGAAUGGUUAUAUGCUGUGAUCCGGAUAGAGUUAGUAUG  
GUACGAGAGCAUGUCAAAUUAAGGUUCAUAGAGUUGUUGGCAGGUAAGGCUGUGAGCG  
AUUGUAUUAAGGUUUUUGUGAAGCAAGAGCCGAUAAAAUGAAGAAAAUUCAGGAAG  
GUACUUAUCGCUUGAUAAAGCGCUGUUAAGCUUAAUUGAUACCUUUAUUGACAGAAUUU  
GUUCGCUUGGAUAGCCAGAGCUCAGAUUGGAUUCCGUCGGGGAGACGCCAUGUCUCAUC  
GGGUGGAGUCCAGUUAGAGGAGGAUGGCGUAAGACAGUGAACAGGUUUGGCAAACAAG  
CAGUAAAUUGUUUAGAUCGAUCGGCUUGGGAUUGGCCUGUACAAGGCUAUUUAAUUGA  
UCUUAAGACAUUGAUUUUGGAAAAUUUACCAGUGAAUCCUCCAGACUGGUGGCUUAAG  
AUGAUGAAACUACGUUUUAAGCUACUGUUUGAAGAGGUUUGGUUUCAGUUCGAAGACG  
GGACAAGAGUAAAGCAGGCAACGCGAGGAGUAAUGAAGAGUGGUUGCUAUUUAAACAA  
UUUGUUAUAUAGUCUUAACCAAACUCUCUUAACAUCGCGUUGCCUGCUUAGAUGUGGG  
AAGCCCAUGACCAUGAAACAACCAUACUCGAUAGGUGAUGACACGGUACAGGAAGCUA  
UGGAUUGGCUUCUAGACUAUGUUAGGCAACUCGAGAUAUUGGGAAUCACGGUCAAGG  
AGCUAAAGUCCAGCAUUGGGUUGAAUUCGCGGGGUUCUGUUUUGACGGGAAAACUUGU  
UAUCCGGCAUACUGGCAAAAACAUCUUUUUAACCUUAAGUAUACGCAAAAACGAGGCC  
UAACUACGAGCUACUUAACAAAAUUCGUACGUCAAUGAGCCUGUGAUGUACGAAUUUG  
UGUGUAGAGUGGCUCGUGAGUUAGGUCCUCGUUUCGUCUUGCCUAAGAUAGAAGCACU  
UGACAUAAAGGAUCAAUUUGGUUGAUUCAUUAUGUCAAGUGCUUCUAU

>Guadeloupe\_mosquito\_viruses\_strain\_AP35\_segment2\_MT808037

GGUCAAGGAGGUGUGAAGAGACGGGCUCGGGCCAGAGGCCAACUUCACGCUUCUGCUA  
AGAAACGGCGCAAUAGGCGCAAUAAGAAACGUGGAGGAGCCACUGGCCCCGAGCGGGGU  
UUCUGCUGAUGGACGUUUUACCGUUCAGAGAGCUGAGCUCCUGUUCGAGAUUAAGGUG  
GCCAAAGGUAGCUCUCCACGUCUUAUUAUGAAGCCUUGCAGCCGACCUCGACCCGAA  
UGACGUGGCCAAAUACUCUGAGUGGUAGUUUCUCUCAGAUAAUUUGGCAUUCCGCGAG  
ACUAGAGUAUCGCCCUGCUGUGGGGGCGAUGAAAGAUGGCUCUCUAGUCGUCGGAGUC  
GACUGGGACCCUACGACGACCGUGCCUAGUAAAAGCAAGGUCGUCGUAGGGUCCAGUC

CUAACUUUCAGGUCCCAGUAUGGCAGAAGAAGGAGUUGACUCUCCCAGCGUCUCGGUU  
GCAGAGUCGUAAGUAUUUAUGCUCUCUCAGAUUCAGGGGACAUACCUCUCACAGACUGU  
UCCCAUGAGUCAGAUGUCUCCAAAGUGACUUGUUCCUCGAAUAAGGAUGAGGAACAGU  
ACUUUUGGAGACAUCUGGAUCCACUAUAAGGUAACCCUGCAGGGGGCCUAAAUAGGGAGA  
CGAGACGCCCCCCCCAUUACCUCAAACACCUAGUGUGUUUGAUUACCACAUGGUUCGGG  
AGGUAACCCUAUAUGAAGUGCGGGCAUUUGUAAAAAAUAAAUAUGAGCGCCAACAUA  
ACAGCCUACUGGAUGUCAUAAGUGUUUUAAAAAUCAGAUGCCGAAGACGCCACAUAAG  
GCUCUCAUACCGUCUCCAGCGGCCCGCUGAGGCUUCCAUAUAAUGCAAACAAAUUCACUA  
UUGACGAUAAUUAUAGCGUGUCUCACGAUGAUUCCAAAGGGGUCAACGUGAGGGGAAAU  
UCAAUGCGCUUCAUAUACCUACCGACAUGGAUUGUUGAACCUGUAGGAUUGGUGCAC  
AUUGGUUUUAUCUUUGAAAAGUCCGUUUUUCCGAAGAUAGCGAUGUUUGAUUUUACGG  
UUCAUGUCGGGUCAAAUACGACCAUAUUUGUACAUAAGGCUUUUCAAGAAGUGAACGU  
UGCAACAGAGUCUGAGAGAGUCGGAAAAACAAGGUUAUUGGUCAACUGAUAAAUCUU  
UUCAAUAGUCAAGCUCCUAGGAGCGAUAAUUGGUUCAUGAUAAAGUUUUGUCAGUUGA  
UAGAAAUCUUAGAUCCAACAGCGGUAAUAAUUGUUAACAUCGUCAUCAACCAAACCUA  
UGUGGAUUGGAGAUGGGAUGGUGACAUGGUGUUGUCACUUAUGAACAUU

>Guadeloupe\_mosquito\_viruses\_strain\_AP43\_segment1\_MT808038

UCGUGGAUUAUCCCUUCAUUCGAUGGCGCAAGGCUCCAUAUGUAUUUCAAAGAAAUC  
CGGUUUGCACGUAAGAAGGAUACCGCCAACAUGGCUUUUAUUAACGGGUUCACCACUGC  
AGGUAGUCGCCUUAUUGAUGUCAGCUAUAUUGAUGUCAUUUGUGGUGAACCCGUUGAA  
UAAAGCCAUGUUGGCGGUAUCCUUCUACGUACAAACCGGAUUUCUUUUAAAAUACAUA  
UGGAGCCUUGCGCCAUCGAUUGAAGGGAUAAUCCACGAGCGAUUGUCAGAGACGUAAU  
CUAAAGUGCAUAUGGAAACUUUGGAAACGUUUUUUAUUAGACUAUAAGGUCUAUUUAA  
UGGCUAUAGCAUGUGGUUUUGUAAUCCUUCUUUCGAGUUAUAUAUUGUUGAGGUAA  
GAAAUUGGUGGGGAAAAGACCACCGUGUGUUUGUGGUGCCUAAUGGCCAAGCUGGAGC  
UGGCACUUAUGUCAGUGAGAAAGCUAUGCCGGGAAGUUCUUUUGAGGUGGCUAAAGUU  
CUGCCUACUUUCCAGGCUAUGGUAAUGGCAUCGUUAGAUGGGAUUACUUAUCACGUUA  
UGGGCCAGUGUUUCUGGGUCGAUGAGGGAUUAGCGACAACUGCUAACCCTCAUUGCCGA  
UCUCGAAUAUUUGUGUAUCUACAAGGACGAAGAGAAACGCAUCGAAGUAGGACCAAAA  
ACAUUCGAGAUUCGGCAAUGGGGAUUACGCAGUAUGUCGAAAUCCAACACUGAUAAACGC  
AAAAAUUGGGUUUGAGCAAAGCAAAGUUUGCGAGGCUGGCGGUUCGAAAAAGAUGCCGG  
CUUGAGUGUCAACAUCACAGCCAUGGGAAAGAGAACGAUAGGAUUCCUAGAUAGACAU  
CCACGUUUUCCCAUGGCUGUGAUAGUGUAAGCACCAUUAAGGAUUUAGUGGAGCGC  
CUUACUAUUUCGGCAGGACCAUAUUUGGGAUGCACCUGGGGUUCGGACUCUAAGAACCU  
UGGUUAUGAUGGGGCAUUCUUGAAAACUGAACUCAAGCCCAGUCGGGUUAUAAGAAAC  
CAGUUAAAUUUAAGAACUGAAGAUAGUGCAAGUUUUCUAGAGCAGCAGUUAGAGCGUU  
AUGAAGAAGUAGAGUAUUCUAGAUCUCCGUUAUACCCUGAUGAAUAUAAGGUUAGGAU  
UGGAGGGAUGUACCAUAUUGUUGAUGAGGAAGUGUUGAGUACCGUCUUAAGAGAAG  
AUCCGCUAAGCGAGCACAGGGGGAUUUACAAUAUUUGGCUGAACAAGCUGAAGUUGGA  
CCCCUCAUUGAUCUCGAAGCUGUAACCACUAAGGGAGACCUUACUAGGUCUCAACAGA  
GUGGACAAAAACAGCAUCAGGAGCUUUCUACUGAGACGGAUCCGAUAAUAGCUAUGAC  
UAAAGGGCUAUUGUCAGAAUUUGGCAAAACCUCAGUGUAUGUUCUCCAGAACCUAAG  
AGUAAAGACCAAGGGACAUGCACUAGUUGUGAGUCUUGUGGCGCCUAUAUAUGUUCUG  
UACAUUCCUCUGAUUAUCCUGAAACGCCUACUGCGGAUGCCAAGAAAGCGGAAGAUUU  
ACCUUUAGCGCCUAGGAAUGCCAUGACGUUUAAUGAUUCGGAAAACCUGAUCAGGGCU  
CCAGCUGUAGUUGUUGGGGGCCCGUGGCAUGGAUAUUCAGAGGGAAAGUGUACAGAGCC  
ACGACUUGCCAAGAUGCAAGAAAAUGGAUUGCAUGUGCCAGAAACCUUUGGAGACCUG  
CCUUAUGGAAUCCCGUACAUAUGACGCGUGCUCCGCCAAAAGAAGCUUCCGCACGCACUG

UCAGAAACAAAAACAGACGGAUGCGCCGCCAACAGCAGAAGAAAGAACUAGAGCAGUU  
CAAGCAGCUCUACGGACCUAUUCCGCAUGGAGGUGCGACCUCACAUCCGCAGCAGAUCC  
CCACAAAUGGUUUGAUAGGGAAUUCAAUAAAGCACUAGAGGAGAUAGAUUAGGAUAGC  
ACUCCUGGCUACUGUAUUCUAUCGCUCACAGCCUCUACCAAUGCACAACUCAUUGACUU  
AAUUUGUAUAUGCUGUGAUCCGGAUAGAGUUAGUAUGGUACGAGAGCAUGUCAAAU  
AAGGUUCAUAGAGUUGUUGGCAGGUAAGGCUGUGAGCGAUUGUAUUAAGGUUUUUGU  
GAAGCAAGAGCCGCAUAAAAUGAAGAAAAUUCAGGAAGGUACUUAUCGCUUGAUAAAGC  
GCUGUUAGCUUAAUUGAUACCUUUUUGACAGAAUUUUGUUCGCUUGGAUAGCCAGAG  
CUCAGAUGGAUUCGUCGGGGAGACGCCAUGCCUCAACGGACGGAAUCCACCGAGAGC  
CGGAUGGCGUAAGAUAGUGAACAGGUUUGGCAACCAAGCUGUAAAUUGUUUAGAUAGA  
UCAGCUUGGGACUGGACUGUACAAGGCUAUUUAGUUGAUCUUUGGAUUAUUGUUUUUCG  
AACUGAAACCAGUGAACCCUUCACUCUUGUGGCUUUAGAUGAUGAAACUACGUUUUAA  
GCUACUGUUUGAAGAGGUUUGGUUUCAGUUCGAAGACGGGACAAGAGUAAAGCAGGCCA  
ACGCGAGGAGUAAUGAAGAGUGGUUGCUAUUUAAACUAAUUUGUUAAAUAGUCUCAGCC  
AAAGUCUCUACAUAUACGUAGUCAACAGUAGAUGUGGGAAGCCCAUGACUAUGAAACA  
ACCAUACUCGAUAGGUGAUGACACGGUACAGGAAGCUAUGGAUUGGCUUCUAGACUUA  
GUUAGACAACUCGAGAUAUUGGGAAUACACGGUCAAAAGGAGCUAAAGUCCAGCAUUGGG  
UUGAAUUUGCGGGGUUCUGUUUUGACGGGAAAACUUGUUAUCCGGCAAAACAGAAACC  
CAGCAAUUC AACCCAAUGCUGGACUUUAGCUCCUUUGACCGUGAUUCCCAAUAUCUC  
GACGUCAAAGGAGCUAAAGUCCAGCAUUGGGUUGAAUUUGCGGGGUGCUGUUUAGAC  
AACUCGGGAUAUUGGGGAUUGCGGCUAAAGGAGCUAAGGUCCAGUCUUUG

>Guadeloupe\_mosquito\_viruses\_strain\_AP43\_segment2\_MT808039

ACGUCACGGCGCCGUUCGGCACCGAACUAAUGUGUAACGAGACCGCUAAGAAACGGCG  
CAAUAGGCGCAAUAAGAAACGUGGAGGAGCCGACGGCCCGAGCGGGGUUCUGCUGAU  
GGACGUAAUACCGUUCAGAGAGCUGAGCUCCUGUUCGAGAUUAAGGUGGCCAAAGGUA  
GCUCUUCCACGUCUUAUUAUGAAGCCUUGCAGCCGACCUCGACCCGAAUGACGUGGCU  
AAAGUCUCUGAGUGGUAGUUUCUCUCAGAUAAUUUGGCAUUCGCGAGACUAGAGUAU  
CGCCCUGCUGUGGGGGCGAUGAAAGAUGGCUCUCUAGUCGUCGGAGUCGACUGGGACC  
CUACGACGACCGUGCCUAGUAAAAGCAAGGUCCAAAGUUGUACUCCUAAACUUUCAGGU  
CCCGGUAUGGCAGAAGAAGGAGUUGACUCUCCCAGCGUCUCGGUUGCAGAGUCGUAAG  
UAUUAUGCUCUCUCAGAUUCAGGGGAUAUACCCAUGAUAGACAAAGCCCCUUGUGAGG  
UUUUGGCCUAUUUGGCUUGUUCUCGAAUAAGGAUGAGGAACAGUACUUUGGAGACAU  
CUGGAUCCACUAUAAGGUAACCCUGCAGGGGCCUAAAUAGGGAGACGAGACGCCCCC  
CCAUCACCUCAGGACCUAGUGUGUUUGAUUACCAUUGGUUCGGGAGGUAACCCUAU  
AUGAAGUGCGGGCCAUUGUAAGAACUAAAUCUGAACGUUAUCAUACCCCGCCAUCUGG  
AUCUCAUAAGGGUUUUAUAUCCAGAUUGUCGAACAGGGAUUAUGAUAAACGUAUGCAGCG  
GCGGCUGAGGUUUCAGUCAUUGGAACCGAUUUAACUAUUGAGGAUAAUUAUAGCGUUU  
CUCACGAUGAUUCGAAAGUGGACAACGUGAGUGAAAUCAAUGCGCUUCAAUACCCCC  
GACAUGGAUUGGUGAACCGUGAAGGAUUGGUGCACAUAUAGUUUAUCUUUGAAAAGUCCU  
UAUUUUCGGAAGAUAGCGAUGUUUGAUUUUAAGGUUCAUUUCGUGUCAAAUAGGAACA  
UUUUUGUCCUAAGGCUCUUAAGAAGUGAACGUUGCUAUUUCUGAGAGCGUAGAGAA  
CAAGGUUAUUGGUCAACUGAUAAAUCUUUCAAUAGUCAAGCUCCUAGGAGCGAUAAU  
UGGUUCAUGAUAAAGUUUUGUCAGUUGAUAGAAAUCUUAAGAUCCAACAGCGGUAAUAA  
AUGUUAACAUCGUCAUCAACCAAACCUAUGUGGAUUGGUUGAUGACGAUGUUGACAUG  
GUGUUGGAUAUUACGACCAAUAUACACGUUCUAUAACUCUGUUACGUCUCUGUUGGAC  
GUUAGGGAG

>Guadeloupe\_mosquito\_viruses\_strain\_AP44\_segment1\_MT808040

GGCACUGACACUAAUGCCAGUGAGAAAGCUAUGCCGGGAAGUUCUUUUGAGGGUAGCUA  
AAGUCCUGCCUACUUUCCAGGCUAUGGUAAUGGCAUCGUUAGAUGGGAUUACUUAUCA  
CGUUAUGGGGCCAGUGUUUCUGGGUCGAUGAAGGCUUAGUGACAGCAGCCCAUAACGUG  
AUUGAGGGUUUUGAAUAUUUGUGUAUCUACAAGGACGAAGAGAAACGCAUCGAAGUA  
GGACCAAAAACAUUCGAGAUCCGGCAAUGGGGAUUACGCAGUAUGUCGCAAUCCACCAU  
UGCCGACUCGAAUCUUUGGUUUUGCUCAAAGCCCAAUUUUUGCGUUAUGCAGUCGAACU  
UGAGUUCAGUUUGAGUGUUAAACAUCAUAGCCAUGGGAAAGAGAACGAUAGGAUUCCUA  
GAUAGACAUCCACAAUUUGGGUAUGUUCGUUAUAGUGGAAGCACCAUUAAGGAUUUA  
GUGGAGCUCCUACUUAUUUGGCAGGACCAUUAUUUGGAAUGCAUCUGGGGUCGGACUC  
UAAGAACCUUGGUUAUGAUGGAGCAUUCUUGAAAACUGAACUCAAGCCCAGUCGGGUU  
AUAAGAAUGCUCCAGUCAAAACCAAGGUUCUAGAGUCCGACGCCAGUUUUUCUAGAGC  
AGCAGUUAGAGCGUUCUCAAACAAUACAGUCCUCCAGAUCCCCGUAUAUUCCCGAUGA  
AUUAAGGUUAGGAUUGGAGGGGAUGUAUCAUAUUGUUGAUGAGGAAGUGUUGAGUAC  
CGUCUUAAGAGAGAAGAUCCGCUAAGCGAGCACAGGGGGGAUUUACAAUUUUUGACGGUA  
CAAGCUGAAGUUGGGCCCCUCAUUGAUCUCGAAGCUGUAACCACUAAGGGGCGACCUUA  
CUAGGUCUCAACAGAGUGGACAAAACAGCACCAGGAGCUUUCUACUGAGACGGAUCC  
GAUAAUCUCCAUGACUACUGUCUAUUGUCAGAAUUUUGCAAACCCUCAGUGUACGUU  
CCUCCAGAACCUAAGAGUAAAGACCAAGGGACAUGCACUAGUUGUGAGUCUUGUGGCG  
CCUAUAUAUAUUGGGGGGAGUCUAGGGGAUAUUCUGAAACGCCUACUGCGGAUGCCAA  
GAAAGCGGAAGAUUUACCUUUAGCGCCUAGGAAUGCCAUGACGUUUAUGAUUCCGGA  
AACCUGAUCAGGGCUCAGCUGUAGUUGUUGGGGCCCGUGGCAUGGAAUAUCAGAGGC  
AAAGUGUACAGAACCACUGGCGCUGGCGACGAUGCAAGAAAAUGGAUUGCAUGUGCCA  
GAAACCUUUGGAGACCUGCCUUAUGGAAUCCCGUACAUAUGACGCGUGCUCCGCCAAAA  
GAAGCUUCCGCACGCACUGUCAGAAACAAAAACAGACGGAUGCGCCGCCAACAGCAGA  
AGAAAGAACUAGAGCAGUUCAAGCAGCUCUACGGACCUAUUCGCAUGGAGGUGUGAC  
CUCACAUCCGCAGCAGAUCCCCACAAUUGGUUUGAUAGGGAAUUCAAUAAAGCACUAG  
AGGAGAUAGAUUGGAUAGCACUCCUGGCUACUGUAUUUUUGACAAAUAAGUAGCCAG  
GAAGACGCAAAUCUUUGGUUCGAAUGGUUAUAUGCUGUGAUCCGGAUAGAGUUAGUAUG  
GUACGAGAGCAUGUCAAAUUAAGGUUCAUAGAGUUGUUGGCAGGUAAGGCUGUGAGCG  
AUUGUAUUAAGGUUUUUGUGAAGCAAGAGCCGCAUAAAAUGAAGAAAAUUCAGGAAG  
GUACUUAUCGCUUGAUAAAGCGCUGUUAGCUUAAUUGAUACCUUUAUUGACAGAAUUUU  
GUUCGCUUGGAUAGCCAGAGCUCAGAUUGGAUUCGUGCGGGGAGACGCCAUGUCUCAUC  
GGGUGGAGUCCAGUUAGAGGAGGAUGGCGUAAGACAGUGAACAGGUUUGGCAAACAAG  
CAGUAAAUUGUUUAGAUCGAUCGGCUUGGGAUUGGCCUGUACAAGGCUAUUUAAUUGA  
UCUUAAGACAUUGAUUUUGGAAAAUUUACCAGUGAAUCCUCCAGACUGGUGGCUUAAG  
AUGAUGAAACUACGUUUUAAGCUACUGUUUGAAGAGGUUUGGUUUCAGUUCGAAGACG  
GGACAAGAGUAAAGCAGGCAACGCGAGGAGUAAUGAAGAGUGGUUGCUAUUUAAACAAA  
UUUGUUAUUAGUCUUAACCAAACUCUCUACAUCGCGUUGCCUGCUUAGAUGUGGG  
AAGCCCAUGACCAUGAAACAACCAUACUCGAUAGGUGAUGACACGGUACAGGAAGCUA  
UGGAUUGGCUUCUAGACUAUGUUAGGCAACUCGAGAUUUUGGGAUACAGGUCAAAGG  
AGCUAAAGUCCAGCAUUGGGUUGAAUUCGCGGGGUUCUGUUUUUGACGGGAAAACUUGU  
UAUCCGGCAUACUGGCAAAAACAUCUUUUUAACCUUAAGUAUACGCAAAAACGAGGCC  
UAACUACGAGUACUUAUCAAUUUCGUACGUCAAUGAGCCUGUGAUGUACGAAUUUGU  
GUGUAGAGUGGCUCGUGAGUUAGGUCCUCGUUUCGUCUUGCCUAAGAUAGAAGCACUU  
GACAUAAAGGAUCAAUUUGGUUGAUUCAUUAUGUCAAGUGCUUCUUAU

>Guadeloupe\_mosquito\_viruses\_strain\_AP44\_segment2\_MT808041

UGGCAUUCGCGCAGAUAGAGUAUCGCCCUGCUGGGGGGCGAGCUCUAGUUCGCGAUGAA  
GGUGGCCAAAGGUAGUUCUUCACGUCUUAUUAUGAAGCCUUGCAGCCGACCUCGACC

CGAAUGACGUGGCUAAAGACUCUGAGUGGUAGUUUCUCUCAGAUAAUUUGGCAUUCCG  
CGAGACUAGAGUAUCGCCCUGCUGUGGGGGCGAUGAAAGAUGGCUCUCUAGUCGUCGG  
AGUCGACUGGGACCCUACGACGACCGUGCCUAGUAAAAGCAAGGUCCAAGUUGUACU  
CCUAACUUUGAGGUCCCGGUAUGGCAUAUGAAGGAGUUGACUCUCCAGCGUCUCGGU  
UGCAGAGUCGUAAGUAUUAUGCUCUCUCAGAUUCAGGGGAUAUACCCAUGAUAGACAA  
AGCCCCUUGUGAGGUUUUGGCCUAUUUGGCCUUGUUCCUCGAAUAAGGAUGAGGAACAG  
UACUUUGGAGACAUCUGGAUCCACUAUAAGGUAACCCUGCAGGGGGCCUAAAUAGGGAG  
ACCACCAGCCACCCCAUCGCCUCCAGGACCUAGUGUUUUCGACUACUACAUGGUUACG  
GAUGUAGCCCUACGCGAAGUGCGGGACAUCGUAAGAACUAUAGAUGAGCCCCAACUA  
AACAGACUUCUGGAUAUUAUAAACCUUUUGAGAUAUCCAGAUUGGCGAACAGGGGAUAUGAU  
AACGUAUGCAGCGGCGGCUGAGGUUUUAGUCAAUUGGAACCGAUUUAACUAUUGAGGAU  
UAUUAUAGCUUUUCUCACGAUGAUUCGAAAGUGGAGAAUGUGAGUGCAAGUCAAGGCG  
CUUCAAGGCCCCCGACAUGGAAUGUUGAACCGUAGGAUUGGUGCACAUAUGGUUUUUC  
UUUGAAAAGUCCUUAUUUUCGGAAGAAAGCGAUGUUUGAUUAUACGGUUCAUUUCGUG  
AAAAAUAGGAACAUCUUCUUCGUACGGCUUUUAACGAAAUGAACGUUGCUAUUUCUG  
AGAGCGCGAAAAUCAAGGUUAUUGGUCCUGUAAUGAAUCUUUUCAAUAGUCAAGCUCC  
UAGGAGCGAUAAUUGGUUCAUGAUAAAGUUUUGUCAGUUGAUACCAAUUAUCGCUCCA  
GGAGCGGUAAUAAAUGUUAACAUCGUCAUCAACCAAAGCCAUGUGGAUUGGAGAUGGG  
AUGGUGACGUGGUGUUGGAUAUUACGCCAAUAAUCACG

>Guadeloupe\_mosquito\_viruses\_strain\_AP47\_segment1\_MT808042

CCCCCUUCCCCCCCCACUCCCCCCCCUCACCAUAUCUAUAGCUCGAAAGAAGGAUAUCA  
AAACCACAUGCUAUCCUUCUUCGAGCUAUUAUUAUGUUGAGGUUAGAAAUUGGUGGG  
CAAAAGACCACCGUGUGUUUGUGGUGCCUAAUGGCCAAGCUGGAGCUGGCACUUAUGU  
CAGUGAGAAAGCUAUGCCGGGAAGUUCUUUUGAGGUGGCUAAAGUCCUGCCUACUUUC  
CAGGCUAUGGUCAUGGCAUCGUUACAUGGGAUUAUCCAACCCCUCAUGGGGCUGCUGUC  
ACUAAGCCUUCAUUCGACUCCGAAACAAUGGCCACGUUAUUGAGGGGUUUUGAAUAUUU  
GUGUAUCUACAAGGACGAAGAGAAACGCAUCGAAGUACGACCAAAAACAUUCGAGAUC  
GGCAAUGGGGAUUAACGCAGUAUGUCGCAAUCCAACACUGCUCACGCAAAAAUUGGGUU  
UGGGCAAAGCAAAGUUUGCGAGGCUGGCGGUCGAAAAAGAUGCCGGCUUUAGUGUUA  
CAUCACAGCCAUGGGAAAGAGAACGAUUGGAUUCUGGAUAGACAUCCACAAUUUGGG  
UAUGUUCGUUAUAGUGGAAGCACCAUUAAGGAUUUAGUGGAGCUCCUACUAUUUUG  
GCAGGACCAUAUUUGGAUUSCAUCUGGGGUCGGAAUCUAGAGAUUCUUAUUAUGAUGG  
UGCAUUCUUUAAAACUGAACUCAAGCCCAGUCGGGUUAUACGAAACCAGUUUAAUUUU  
AGAACUGAAGAUAGUGCAAGUUUUCUUAAGCAGCAGUCUGAACGUUAUGAAGAAGUGG  
AGUAUUCUAGAUCUCCGUAAUAAUCCCGAUGAAUAUAAGGUUAGGAUUGGAGGGGAUGUA  
UCAUAUUGUUGAUGAGGAAGUGUUUAGUACCGUCUUUAAGAGAAGAUCCCGCUGUGCG  
CGCACAGGCGGAUCUUCUCUUUAAGACGGUACUCAACGCUGAAGUUGGGCCCCUCAUU  
GAUCUCGAAGCUGUAACCACUAAGGGAGACCUUACUAGGUCUCAACAGAGUGGACAAA  
AACAGCACCAGGAGCUUUCUACUGAGACGGAUCCGAUAAUAGCUAUGACUAAAGGGCU  
AUUGUCAGAAUUUGGCAAAACCUCAGUGUACGUUCCUCCAGAACCUAAGAGUAAAGAC  
CAAGGGACAUGCACUAGUUGUGAGUCUUGUGGGCGCCUAUAUAUAUYRGKRGMGUYUC  
AGGAAUAUCAGAGGGGAAAGUGUACAGAGGAUGCCAAGAAAGCGGAAGAUUUACCUUUG  
GCGCCUAGGAAUGCCAUGUCGUUUAUUGAUUCGGAAAACCUGCUCAUGGCUCCAGCUG  
UAUUUGUUGGGGCCCUGGCAUGGAAUAUCAGAGGGGAAAGUGUACAGAGCCACGACUU  
GCCAAGAUGCAAGAUACUGGAUUGCAUGUGCCAGAAACCUUUGGAGACCUGCCUUAUG  
GAAUCCCGUACAUCGACGCGUGCUCGCGCAAAGAAGCUUCCGCACGCACUGUCAGAAA  
CAAAAACAGACGGAUGCGCCGCCAACAGCAGAAGAAAGAACUACAAUAGGUCGAACUG  
CUCUAGUUCUUUCUUCUGCAUGUAUGUGCGGUCUCACAUCCGUAGCAGUCCCCAUA

AAUGGUUCGAUUGGGAAUUCAACAAAGCACUAGAGGAGAUAGAUUAUGGAAAGCACUCC  
UGGCUACUGUAUUUUGACUCUUUUAGGCUCUACGAAUGCGCAAUUCUUCGGUUGGAAU  
GGUAUAUGCUGCGAUCCGGACAGAGUGAGUAUGGUACGAGAGCAUGUCAAAUUAAGGU  
UCAAUCAGUUGUUGGCAGGAAAGGCUGUGAGCGAUUGUAUCAAGGUUUUUGUGAAGCA  
AGAGCCGCAUCAAAUGAAGAAAAUUCAGGAAGGUACUUAUCGCUUGAUAAAGCACCGUA  
UGC UAAUUCGAUUCCUUUAUAUGCAGAGUCUUGC UUCACAAAAUAGCCAGAGCUCAGA  
CGGAUCCCGUCAGCUAGACGCCAUGUCUCAUCAGGUGGAGUCCAGUUCGAGGCGGAUG  
GCGUACGAUAGUGAACAGGUUUGGCAACCAAGCAGUAAAUUGUUUAGAUCGAUCGGCU  
UGGGAUUGGACUGUACAAGGCUAUUUAGUCGAUCUUGGAUAUUCCAAUCCCAAGAAA  
ACUUAACCACAAAACCUCUCAGACUGGUGGCUAGAGAUGAUGAAACUACGUUUAAGCU  
ACUGUUUCAAGAGGUUUGGUUUCAGUUCGAAGACGGAACAAGAGUAAAGCAGGCAACG  
CGAGGAGUAAUGAAGAGUGGUUGC UAUUUAACU AUUUUGU UAAAUCGCAACCACUCU  
CAUUA CAUUAACGUAGUCAACAGUCGAUGUGGGAAGCCCAUGACCAUGAAACAACCAUA  
CUCGAUAGGUCACGACACGGUACAGGAAGCUAUGGAUUGGCUUCUAGACUAUGUCAGA  
CAACUCGAGAUAUUGGGAAUCACGGUCAAAAGGAGCCAAAGUCCAGCAUUGGGUUCAAU  
UUGCGGGGUUCUGUUUCGACGGGAAAACUUGUUUAUCCGGCAUACUGGCAAAAACAUCU  
UCUCAAAACUGAUAAACUACGCAAAAUCUUGGGGAGACUUUGCGGAGUUAUCAGUAUUUG  
UACGUCAAUCAGCCUGUGAUGUACGAAUUGUGUGCAGAGUGGCUCGGGAGUUAGGUC  
CUCGUUUCGUCUUGCCCAAGAUAGAAGCACUAGACAUAAUGGAUCAAUUUGGUUGAUU  
CAUUAUGUCUAGUGCUUCUAUCUUAAGGCAAGACGAAACGAGGACCUAACUCACGAGCC  
ACUCUACACACAAAUUCGUACAUCACAGGCUCAUUGACGUACGAAUUGUGUGUAGAG  
UGGCUCGUGAGUUAGGUCCUCGUUUCGUCUUGCCU AAGAUAGAAGCACUAGACAUAAU

>Guadeloupe\_mosquito\_viruses\_strain\_AP47\_segment2\_MT808043

UGUUA AAAUAAACAAUGAGUAAACAGUUGAAGAAACAGU UUCUUGCAUCUUU AACUGC  
UCAAGUAGCUGCGAUAGGGGUUGCCAAACCGCUAACCUUCAACGCUUCUGUUAAGAAA  
CGGCGCAAUAGGCGCAAUAAGAAACGUGGAGGAGCCACUGGCCCGAGCGGGGUUUCUG  
CUGAUGGACGUAUUACCGUUCAGAGAGCUGAGCUCCUGUUCGAGAUUAAGGUGGCCAA  
AGGUAGCUCUCCACGUCUUAUUAUGAAGCCUUGCAGCCGACCUCGACCCGAAUGACG  
UGGCUAAAGACUCUGAGUGGUAGUUUCUCUCAGAUAAUUGGCAU UCCGCGAGACUAG  
AGUAUCGCCCUGCUGUGGGGGCGAUGAAAGAUGGCUCUCUAGUCGUCGGAGUCGACUG  
GGACCCUACGACGACCGUGCCUAGUAAAAGCAAGGUCCAAAGUUGUACUCCU AACUUU  
CAGGUCCCGGU AUGGCAGAAGAAGGAGUUGACUCUCCAGCGUCUCGGUUGCAGAGUC  
GUAAGUAUU AUGCUCUCUCAGAUUCAGGGGAUUAUACCCAUGAUAGACAAAGCCCCUUG  
UGAGGUUUUGUCCUAUUUGGCUUGU UCCUCGAAUAAGGAUGAGGAACAGUACUUUGGA  
GACAUCUGGAUCCACUAUAAGGUAACCCUGCAGGGGCCUAAAUAGGGGAGACGAGACGC  
CCCCCCCCAUUACCUCAGGACCUAGUGUGUUUGAUUACCACAUGGUUCGGGAGGU AAC  
CCUAUAUGAAGUGCGGGCCAUUGUAAGAACUGCAUAUUAUCGAUAUCCUGU UCCGCCA  
UCUGGAUCUCAUAAGGGUUUUAUAUCCAGAUGUUGAACUGGGAUAUGAUAAACGUAUG  
UAGCGGCGGCUGAGGUUUCAGUCAAUUGGAACCGAUUUAACUAUUGAGGAUAAUUAUAG  
CGUUUCUCACGAUGAUUCGAAAGUGGACAACGUGAGUGAAAUUCA AUGCGCUUCAUA  
CACCCGACAUGGAAUGUUGAACCUGUAGGAUUGGUGCACA UUGGUUUAUCUUUGAAAA  
GUCCGU AUUUUCCGAAGAUAGCGAUGUUGAUUUUACGGUUC AUUUCGUGUCAAAUAG  
GAACA UUUUUGU UCCUAAGGCUCUCAAGAAGUGAACGUUGCCA UUCAGAGAGCGGG  
ACCGUCAACA UACUGGUCAACUGAUAAACUUAUCAAUAGUCAAGCUCCUAGGAGCG  
AUAAUUGGUUCAUGAUAAAGUUUUGUCAGUUGAUAGAAUCUUAAGAUCCAACAGCGGU  
AAUAAAUGUUAACAUCGUCAUCAACCAAACCUAUGUGGAUUGUAGAUGGGAUGGUGAC  
AUGGUGUUGGAUAUUAACCAAUAUAUCAGUUCUAUAACUCUGUUACGUCUCUGUUGC  
ACUUCA

>Guadeloupe\_mosquito\_viruses\_strain\_AP49\_segment1\_MT808044

UUCCCACAUCCCCUUCAGACACGUCUCUAUUAGACCACAAUCGCUCUGGGAUUAUCCCU  
UCAAUUCGAUGGGCGCAAGGCUACCAUACUGUUAUAUGUAUGUUGGCACGAACAUUCGGU  
GGGCAAAAGACCACCGUGUGUUUGUGGUGCCUAUUGGCCAAGCUGGAGCUGGCACUUA  
UGUCAGGGGAGAAAGCUAUGCCGGGAAGUUCUUCGAGGAAGCCAAAGUCCUGCCUACU  
UUCCAGGCUAUGGUCAUGGCAUCGUUACAUGGGAUUACCUAUCCUGGUUUGGGGCAGU  
AUCUUAAGUCAAUACAGGGGCUUAGUGACAGCAGCCCACGUGAUGGAGGGUUAUCGAAUA  
UUUGUGUAUCUACAAGGACGAAGAGAAACGCAUCGAAGUAGGACCAAAAAUAUUCAAA  
ACCCUCAAUACAGUUUGGGCAGUGUGUCUAAAGCCCACAGUGAUGGCUGUGAUGUUA  
CACUCAAGCCGGCAUCUUUUUCGAGGCUGGCUGUCGUAAAAGUUGCCGGCUUGAGUGU  
CAACAUCACAGCCAUGGGAAAGAGAACGAUAGGAUUCUAGAUCGACAUCCACAAUUU  
GGGUAUGUUCGUUAUACUGGAAGCACCACCAGAUCCUUCAGUGGUGCUUCCACUAUAA  
CGACAUACCCAAAUUGUGGAUGUGCUAUCUGGGGUCGGACUCUAAGAACCUUGGUUAU  
GAUGGAGCAUUCUUGAAAACUGAACUCAAGCCCAGUCGGGUUAUAAGAACCUGGUUA  
AUGUAAGAUCUUAUGAUAGUGCAAGUUUUCUAGAGCAGCAGUUAGAGCGUUAUGAAG  
AAGUAGAGUAUCUCAGAUCCCCGUAAAUUCCCGAUGAAUAUAAGGUUAGGAUUGGAGG  
GAUGUAUCAUAUUGUUGAUGAGGAAGUGUUGAGUACCGUCUUAAGAGAAGAUCCGCU  
AAGCGAGCACAGGGGGAUUUACAGGUUCUGGAGGAACACACUGAAGUUGGGCCCCUCA  
UUGAUCUCGAAGCUGUAACCACUAAGGGAGACCUUACUAGGUCUCAACAGAGUGGACA  
AAACAGCACCAGGAGCUUUCUACUGAGACGGAUCCGAUAAUAGCCAUGACUAAAGGG  
CUAUUGUCAGAAUUUGGCAAAACCUCAGUGUACGUUCCUCCAGAACCUAAGAGUAAAG  
ACCAAGGGACAUGCUCCAAUCCUGAACCUAUAUUAUCUACGGGAUUUAUACAGGAGAU  
CAGGGAUAAUCCUGAAACGCCUACUGCGGAUGCCAAGAAAGCGGAAGAUUUACCUUA  
GCGCCUAGGAAUGCCAUGACGUUUAUGAUUCGGAAAACCUGAUCAGGGCUCCAGCUG  
UAGUUGUUGGGGCCCCGUGGCAUGGAAUAUCAGAGGGAAAGUGUACAGAGCCACGACU  
GCCAAGAUGCAAGAAAAUGGAUUGCAUGUGCCAGAAACCUUUGGACACCUGCCUUCUG  
GAAUCCCGUACAUUGACGCGUGCUCGCUAAAAGAAGCUUCCGCACGCACUGUCAGAA  
ACAAAAACAGACGGAUGCGCCGCCAACAGCAGAAGAAAGAACUAGAGCAGUUAAGCA  
GCUCUACGGACCUAUUCCGCAUGGAGGUGUGACCUCACAUCCGCAGCAGAUCCCCACAA  
AUGGUUUGAUAGGGAAUCAAUAAAGCACUAGAGGAGAUAGAUACAGAUAGCACAGG  
AGGCUAUCCAUAUCUAUCUCUUCUAGGCUCUACGAUUGCCCUAAUCAUUUGUUGGAAU  
GGUAUAUGCUGUGAUCCGGAUAGAGUUAUGUAUGGUACGAGAGCAUGUCAAAUUAAGG  
UUCAAUGAGUUGUUGGCAGGUAAGGCUGUGAGCGAUUGUAUUAAGGUUUUUGUGAAG  
CAAGAGCCGCAUAAAAUCGAGAAAAUUCAGGAAGGUACUUAUCGCUUGAUUAGCACCU  
UCCUGAAUGUUAUGUCAUUUCCUGACGGAUUUUUCUUCGCUUGGAUAGCCAGAGCUCU  
AAUGGAUUCCGUCGGGGAGACGCCAUGUCUCAUCGGGUGGAGUCCAGUUAGAGGCGGA  
UGGCGUAAGAUAGUGAACAGGUUUAGGUCCAACCAAGCAGUAAAUUGUUUAGAUAGAU  
CGGCUUGGGAUUGGACUGUACAAGGCUAUUUAGUUGAUCUUUGGAUAUUGUUUUUGG  
AAAAUUUACCAGUGAAUCCUCCAGACUGGUGGCUUAAAACGUUGUUUCAUCAUCUUA  
GCCACCGUCUGGAGGAUUCUGGUUAUCAGUUCGAAGACGGAUCAUGGGGCUUCCCACAUC  
UACUGUGGAGUAAUGAAGAGUGGCUACUAAUUAAACAAAAUUGUUAAAUAAGUCUUAAGCC  
AAAGUCUCUUAUAUACGUAGUCAACAGUAGAUGUGGGAAGCCCAUGACCAUGAAACA  
ACCAUACUCGAUAGGUGAUGACACGGUACAGGAAGCUAUGGAUUGGUUUCUGGACUGU  
GUUACACAUCUCGAGAUUUGGGAUUCACGGUCAAAAGGAGCUAAAGUCCAGCAUUGGG  
UUGAAUUUGCGGGGUUCUGUUUUGACGGGAAAACUUGUUAUCCGGCAUACUGGCAAAA  
ACAUCUUUUUAACCUUAAGUAUACGCAAAAUCUUGGGGAGACUCACGAGCUACACACA  
AAUUCGUACAUCACAGGCUCAUUGACGUACGAUUUGUGUGUAGAGUGGCUCGUGAGU  
UAGGUCCUCGUUUCGUCUUGCCUAAGAUAGAAGCACUAGACAUAUAUGAAUCAACCAAA

UUGAUCCUAUGUCUAGUGCUUCUAUCUUAGGCAAGACGAAACGAGGACCUAACUCACG  
AGCCACUCUACA

>Guadeloupe\_mosquito\_viruses\_strain\_AP49\_segment2\_MT808045

AUGAAGGCUGCCAAACCGCAACCUAACGUUUCUUAGCAGAAGCGUUAGGUUGCGGUUU  
GGCAACCCUCAUCGCAGCUACUUGAGCAGCUUAAAGACACAACUUGCAUCUUUAACAG  
CUUAAGCAGUUGUGUUCAACGUUACGAUUUAGUCAAGCUACAUGAGCUUCUUAGGUUA  
AAGAUGCAAGCUGUAUCAUCAACUGAUUACUCAUUGCAUUAUUUUAAACACAAUAAGUA  
AACAGUUGAAGAAACAGCUAGCAUCUUUAACUGUUUACUCAUUGUGUUAGAAUAAAGA  
AAUUAAGUAAGUGAUUUUAUGCUUCCUUGGUUAGCCCUUAUAUAACUGAGUUUAAUUGC  
UUUAUUUUAAACACAAUGAGUAAACAGUUGAAGAUCCAUCUUGCAUCGCCCCCAACAGG  
GCAACUACUUCGCGGAAGGUUGCCAAACCGCAACCUAACGCUUCUGCUAAGAAACGG  
CGCAAUAGGCGCAAUAAGAAACGUGGAGGAGCCGCUGGCCCGAGCGGGGUUCUGCUG  
AUGGACGUAUUACCGUUCAGAGAGCUGAGCUCCUGUUCGAGAUUAAGGUGGCCAAAGG  
UAGUUCUCCACGUCUUAUUAUGAAGCCUUGCAGCCGACCUCGACCCGAAUGACGUGG  
CUAAAGACUCUGAGUGGUAGUUUCUCUCAGAUAAUUUGGCAUUCGCGAGACUAGAGU  
AUCGCGGA AUGCAAUUAUGGGGGCGAUGAAAGAUGGCUCUCCAGAGGGUCCUACCUC  
UAGUUGGGACCCAGGGCGACAGUGCAGGGUGAAGGUAAUGUCCUUAAGUUGUACUCCU  
AACCUUGAGGUCCCGGAAUCGCAGAAGAUGGAGUUGACUCUCCAGCGUCUCGGUUGC  
AGAGUCGUAAGUAUUAUGCUCUCUCAGAUUCAGGGGAUAUACCCAUGAUAGACAAAGC  
CCCUUGUGAGGUUUUGGCCUAUUUGGCUUGUCCUCGAAUAAGGAUGAGGAACAGUAC  
UUUGGAGACAUCUGGAUCCACUAUAAGGUAACCCUGCAGGGGCCUAAAUAGGGAGACG  
AGACGCCCCCCCCAUUACCUCAGGACCUAGUGUGUUUGAUUACCACAUGGUUCGGGA  
GGUAACCCUAUAUGAAGUGCGGGCCAUUGUAAGAACUAAAUUAUGAGUCACACCCUGUU  
CAGCCAUCUGGAUAUUAUAAACCCUUGAGAUCCAGAUGGCGAACAGGGAUUAUGAUAA  
CGUAUGCAGCGGCGGCUGAGGUUUCAGUCAAUUGGAACCGAUUUAACUAUUGAGGAUAA  
UUUAAGCGUUCUCACGAUGAUUCGAAAGUGGACAACGUGAGUGAAAUCAAUGCGCU  
UCAAGACCCCCGACAUGGAAUGUUGAACCUGUAGGAUUGGUGCACAUUGGUUUUAUCUU  
UGAAAAGUCCGUAUUUUCCGAAGAUAGCGAUGUUUGAUUUUACGGUUCAUUUCGUGUC  
AAAUAGGAACA UUUUUGUCCUAAGGCUCUUAAGAAGUGAACGUUGCUAUUUCUGAG  
AGCGCGAAGAUCAAGGUUAUUGGUCCUGUAAUGAAUCUUUUGAACAAUACGCUCCUA  
GGAGCGAUAAUUGGUUCAUGAUAAAGUUUUGUCAGUUGAUAGAAAUCUUAGA UCCAAC  
AGCGGUAAUAAAUGUUAACAUCGUCAUCAACCAAACCUAUGUGGAUUGGAGAUGGGAU  
GGUGACAUGGUGUUGGAUAUUACGCCAAUAUACAGUUCUAUAACUCUGUACGUCUC  
UGUUGCACUUUAGGGAGGGGGAGGGUGAGAGUUG

>Guadeloupe\_mosquito\_viruses\_strain\_AP50\_segment1\_MT808046

UGUCAUCGCUUCAUGCGAUCCCUAAUCACGUUAUGGGCCAGUGUUUCUGGGUCGAUGA  
AGGCUUAGUGACAGCAGCCCACGUGAUUGAGGGUUUUGAAUGUUUUUGUAUCUACAAG  
GACGAAGAGAAACGCAUCGAAGUAGGACCAAAAACA UUCGAGAU CGGCAAUGGGGAUU  
ACGCAGUACGGCGCAAUCCAACACUGAUAAACGCAAAAAAUUGGCUUUGAGCAAAGCAA  
GUUUGCGAGGCUGGCGGUCGAAAAAGAUGCCGGCUUGAGUGUUAACAUCACAGCCAUG  
GGAAAGAGAACGAUAGGAUUCCUAGAUAGACA UCCACAAUUUGGGUAUGUUCGUUAUA  
GUGGAAGCACCAUUAAGGAUUUAGUGGAGCUCCUACUAUAUUGGCAGGACCAUAUU  
UGGAAUGCAUCUGGGGUCGGACUCUAAGAACCUUGGUUAUGAUGGGGCAUUCUUGAAA  
ACUGAACUCAAGCCCAGUCGGGUUAUAAGAAACAGUUAUUUUUAAGAACUGAAGAU  
GUGCGAGUUUUCUAGAGCAGCAGUUAGAGCGUUAUGAAGAAGUAGAGUAUUCUAGAUC  
UCCGUUAUAUCCCGAUGAAUAUAAGGUUAGGAUUGGAGGGAUGUAUCAUAUUGUUGA  
UGAGGAAGUGUUGAGUACCGUCUUAAGAGAGAAGAUCCGCUAAGCGAGUACAGGGGGAU

UUACAAUAUUUGGCUGAACAAAGCUGAAGUUGGGCCCCUCAUUGAUCUCGAAGCUGUAA  
CCACUAAGGGAGACCUUACUAGGUCUCAACAGAGUGGACAAAAACAGCACCAGGAGCU  
UUCUACUGAGACGGAUCCGAUAAUAGCUAUGACUAAAGGGCUAUUGUCAGAAUUUGGC  
AAAACCUCGGUGUACGUUCCUCCAGAACCUAAGAGUAAAGACCAAGGGACAUGCACUA  
GUUGUGAGUCUUGUGGGCGCCUAUAUAUAUUGGGGGGAGUCUAGGGAUAUUCCUGAAAC  
GCCUACUGCGGAUGCCAAGAAAGCAGAAGAUUUUACCUUUAGCGCCGAGGAAUGCUAUG  
ACGUUUAAUGAUUCGGAAAACCUGAUCAGGGCUCCAGCUGUAGUUGUUGGGGGCCCGUG  
GCAUGGAAUAUCAGAGGGAAAGUGUACAGAGCCACGACUUGCCAAGAUGCAAGAAAAU  
GGAUUGCAUGUGCCAGAAACCUUUGGAGACCUGCCUUAUGGAAUCCCGUACAUUGACG  
CGUGCUCGCUAAAAGAAGCUUCCGCACGCACUGUCAGAAACAAAAACAGACGGAUGC  
GCCGCCAACAGCAGAAGAAAGAACUAGAGCAGUUCAAGCAGCUCUACGGACCUAUUCC  
GCAUGGAGGUGUGACCUCACAUCCGCAGCAGAUCCCCACAAUGGUUUGAUAGGGAAU  
UCAAUAAAGCACUAGACCAGAUAGCUAUCGAUAUCACUCCUGGCUCUGUUUAUUGAC  
UCUUUUUAGGCUCUACGAAUGCGCAAUUCUUUGGUUGGAAUGGUUAUUGCUGUGAUCCG  
GAUAGAGUUAGUAUGGUACGAGAGCAUGUCAAAUUAAGGUUCAUAGAGUUGUUGGCA  
GGUAAGGCUGUGAGCGAUUGUAUUAAGGCUCUUGUUCAGCAAAAACCUAAUACAAUGC  
UCACAGUUCAGUCCAUAACCAACCGAUCUAUAAACACUUAACGCUUAAUUGAUACCUU  
UAUUGACAGAAUUUUGUUCGCUUGGAUAGCCAGAGCUCAGAUGGAUUCCGUCGGGGAG  
ACGCCAUGUCUCAUCGGGUGGAGUCCAGUUAGAGGGCGGAUGGGCGUAAGAUAGUGAACA  
GGUUUGGCAACCAAGCAGUAAAUUGUUUAGAUAGAUCGGCUUGGGAUUGGACUGUACA  
AGGCUAUUUAGUUGAUCCUUGCAUAUUGUAUUUAGAAAAUUUACCAGUGAAUCCUCCA  
GACUGGUGGCUUUAGAUGAUGAAAUUACGUUUUAAGCUACUGUUUGAAGAGGUUUGG  
UUUCAGUUCGAAGACGGGACAAGAGUAAAACAGUCUACGCGACUAGUAAUGAAGAGUG  
GCUGCUAUUUUACAAUUUUGUUAUUUAGUCUCAGCCAAAGUCUCUUAACAUUACGUAGU  
CAACAGUAGAUGUGGGAAGCCCAUGACUAUGAAACAACCAUACUCGAUAGGUGAUGAC  
ACGGUACAGGAAGCUAUGGAUUGGCUUCUAGACUAUGUAGACAACUCGAGAUUUGG  
GAAUCACGGUCAAGGAGCUAAAGUCCAGAAUUGGGUUGAAUUUGGGGGGGGUCUGUUU  
UGACGGGAAAACUUGUUAUCCGGCAUACUGGCAAAAACAUCUUUUUAACCUUAAGUAU  
ACGCAAACACUAGGACAAACUCACGAGCCUCUACACACAAAUUCGUACGUCAAUGAGC  
CUGUGAUGUACGAAUUUGUGUGUAGAGUGGCUCGUGAGUUAGGUCCUCGUUUCGUCUU  
GCCUAAGAUAGAAGCACUAGACAUAAUGAAUCAACCAAUUGAUCCUAUGUCAAGUGC  
UUCUAUCUUAUGGCGAAUGAAACGAAACGAGUCGACCUAACUCCGAGCCACUCUACAC  
ACAAAUCUACACACAAAUUCGUACGUCAAUGAGCCUGUGAUGUACGAAAUUUGUGUGU  
AGAGUGGCGCGGAGGUAGGUCCUCGUUUCGGUUUGCGUAGUUAUCAGUAUUUGUA

>Guadeloupe\_mosquito\_viruses\_strain\_AP50\_segment2\_MT808047

CUUUGGUACCCAAAGGUGCUUUUACUACGCACGGUCGUGUAGGGUCCAGCCGACCUC  
GACCCGAAUGACGUGGCUAAAUACUCUGAGGGGAAGUUUCUCUCAGAUAAUUUGGCAU  
UCCGCGAGACUAGAGUAUCGCCCUGCUGUGGGGGCGAUGAAAGAUGGCUCUCUAGUCG  
UCGGAGUCGACUGGGACCCUACGACGACCGUGCCUAGUAAAAGCAAGGUCCAAAGUUG  
UACUCCUAACUUUCAGGUUCCCGGUAUGGCAGAAGAAGGAGUUGACUCUCCAGCGUCU  
CGGUUGCAGAGUCGUAAAGUAUUUAGCUCUCUCAGAUUCAGGGGAUUAUACCAUGAUAG  
ACAAAGCCCCUUGUGAGGUUUUGGCCUAUUUGGCUUGUUCUUGAUAAGGAUGAGGA  
ACAGUACUUUGGAGACAUCUGGAUCCACUAUAAGGUAACCCUGCAGGGGGCCUAAAUAG  
GGAGACGAGACGCCCCCCCCAUUACCUCAGGACCUAGUGUGUUUGAUUACCACAUGG  
UUCGGGAGGUAAACCUAUUAUGAAGUGCGGGCCAUUGUAAGAACUAAAUAUGAGCCCCA  
ACAUAAACAGACUUCUGGAUAUUAUAAACCUUUUGAGAUCAGAUUGGCGAACAGGGAU  
AUGAUAAACGUUAGCAGCGGCGGCUGAGGUUUUAGUCAUUGGAACCGAUUUUACUAUUG  
AGGAUAAUUAUAGCGUUUCUCACGAUGAUUCGAAAGUGGACAACGUGAGUGAAAUUA

AUGCGCUUCGAGACCCCCGACAUGGAAUGUUGAACCUGUAGGAUUGGUGCACAUUGGU  
UUAUCUUUGAAAAGUCCGUUUUUUCCGAWSWUCGCGCUCUCAGAAAUAGCAAUUCACU  
UCGUUUCAAGCCUUAGGAACAAAAAUGUCCUAAGGCUCAUAAAGAAGUGAACGUUGC  
UAUUUCUGAGAGCGCGAAGAUAAGGUUAUUGGUCCUGUAAUGAAUCUUUUCAAUAGU  
CAAGCUCCUAGGAGCGAUAAUUGGUUCAUGAUAAAGUUUUGUCAGUUGAUAGAAAUCU  
UAGAUGCAACAGCGGUAAUGAAUGAUGACAUGUUAACAUAUUAUAC

>Guadeloupe\_mosquito\_viruses\_strain\_AP53\_segment2\_MT808048

CUUACUAAAUUCUUUAUUUUAAACGCAAUGAGUAAACAGUUGAAGAAACAGCUUGCAUC  
UUUAACUGCUCAAGUAGCGGCGAUGAAGGUUGCCAAGCCGCAACCUAACGCUUCUGCU  
AGCACCCGUCGCGCUAGUCCCAAUAAGAAGCGUGGAGGAGCCGCUUGGCCCGAGCGGGG  
UUUCUGCUGAUGGACGUUUUACCGUUCAGAGAGCUGAGCUCCUGUUCGAGAUUAAGGU  
GGCCAAAGGUAGUUCUCCACGUCUUAUUUAUGAAGCCUUGCAGCCGACCUUAAUCUCG  
AACAGGUGGCUCAGCUCUCUGAACGGUCACUCCCCUCAGAUAAUUUGGCAUUCGCGA  
GACUAGAGUAUCGCCUGCUGUGGGGGCGAUGAAAGAUGGCUCUCUAGUCGUCGGAGU  
SGACUGGACUCCUACGACGACCGUGCCUAGUAAAAGCAAGGUCCAAAGUUGUACUCCU  
AACUUUCAGGUCCCCGGUAUGGCAGAAGAAGGAGUUGACUCUCCAGCGUCUCGGUUGC  
AGAGUCGUAAGUAUUUAGCUCUCUCAGAUUCAGGGGAUAUACCCAUGAUAGACAAAGC  
CCCUUGUGAGGUUGUGGGCCUAUUUGGCUUGUCCUCGAAUAAGGAUGAGGAACAGUAC  
UUUGGAGACAUCUGGAUCCAUGGUAAUCCAACCACACUAGGUCCUGGAUAGGGGGGCG  
UCUCGUCUCCCCCAUUACCUCAGGACCUAGUGUGUUUGAUUACCACAUGGUUCGGGA  
GGUGACCCUAUAUGAAGUGCGGGCCAUUGUAAGAACUAAAUAUGAGCCCCAACAUAAA  
CAGACUUCUGGAUAUUUAUAAACCCUUUGAGAUAUCCAGAUUGGCGAACAGGGGAUAUGAUAA  
CGUAUGCAGCGGCGGCUGACGUUUCAAUCAUUGGAACAGUUUAACUAUUGAGGAUAA  
UUUAUAGCGUUUCUCACGAUGAUUCGAAAGUGGACAACGUGAGUGAAAAUCAAUGCGCU  
UCAAGACCCCCGACAUGGAAUGUUGAACCUGUAGGAUUGGUGCACAUUGGUUUUUCUU  
UGAAAAGUCCGUUUUUUCCGAAGAUAGCGAUGUUUGAUUCUACAGUUCAAUGCGUGUC  
AAAUAGGAACAUUUUUGUUCUUAAGGCUCUUAAGAAUUGAACGUUGUUUAUUUCUGAG  
AGCGCGAUGUUCAUGGUUAUUGGUUCUGUAACAAAACUUUUCAUGAACCAAGCUCCUA  
GGAGCGAUAAUUGGUUCAUGAUAAAGUUUUGUCAGUUGAUAGAAAUCUUAGAUGCAAC  
AGCGGUAAUAAAUGUUUAACAUCGUCAUCAACCAAUCCGACAUAAGGUUUGGGAUGGGAU  
GGUGACAUGGUGUUGGAUAUUACGCC

>Guadeloupe\_mosquito\_viruses\_strain\_AP57\_segment1\_MT808049

AUUGCAUGUGGCAGUCUCCAAAGGAUUUCUGGCACAUGCAAUCCCGUACAUAUGACGCG  
UGCUCGCUAAAAGAAGCUUCCGCACGCACUGUCAGAAACAAAAACAGACGGAUGCGC  
CGCCAACAGCAGAAGAAAGAACUAGAGCAGUUCAAGCAGCUCUACGUUCUUCUUCUGC  
UUGGCGGCGCAUCCUCUCAUCCGUCGAGAUCCCCACAAAUGGUUUGAUAGGGAAUUC  
AAUAAAGCACUAGAGGAGAUAGAUUAGGAUAGCACUCCUGGCUACUGUAUUUUGACUC  
UUUUAGGCUCUACGAUUGCGCAAUCUUCGGUUGGAAUGGUUAUAGCUGUGAUCCGGA  
UAGAGUUAGUAUGGUACGAGAGCAUGUCAAAUUAAGGUUCAUAGAGUUGUUGGCAGG  
UAAGGCUGUGAGCGAUUGUAUUUAGGUUUUUGUGAAGCAAGAGCCGCAUAAAUGAA  
GAAAAUUCAGGAAGGUACUUAUCGCUUGAUAAAGCGCUGUAAGCUUAAUUGAUACCUUU  
AUUGACAGAAUUCUGUUCACUAGGUUAGCCAGAGCUCACUGGAUUCCCCCGGGGAGA  
CGCCAUGUCUCAUCGGGUGGAGUCCAGUUAGAGGCGGAUGGCGUAAGAUAGUGAACAG  
GUUUGGCAACCAAGCAGUAAAUUGUUUAGAUAGAUCCGCUUGGGAUUGGACUGUACAA  
GGCUAUUUAAUUGAUUUUGGAUAUUGUUUUUGGAAAAUUUACCAGUGAAUCCUCCAG  
ACUGGUGGAUUAAGAAGAUCAAUUACGUUUUAAGCUACUGUUUGAAGAGGUUUGGU  
UUCAGUUCGAAGACGGGACAAGAGUAAAGCAGGCAACGCGAGGAGUAAUGAAGAGUGG

UUGCUCACUUAACUAUUUUGUUAAAUAAGUCUUAGCCAAAGUCUCUUACAUAUACGUAGUC  
AACAGUAGAUGUGGGAAGCCCAUGACCAUGAAACAACCAUACUCGAUAGGUGAUGACA  
CGGUACAGGAAGCUAUGGAUUGGCUUCUAGACUAUGUUAGACAACUCGAGAUAUUGGG  
AAUCACGGUCAAAAGGAGCUAAAGUCCAGCAUUGGGUUGAAUUUGCGGGGUUCUGUUUU  
GACGGGAAAACUUGUUAUCCGGCAUACUGGCAAAAACAUCUUUUUAACCUUAAGUAUA  
CGCAAAAUUCUUGGGGAGACUCACGAUCUACACACAAAUUCGUACGUCACAGAGCCAUA  
GACGUACGAAUUUGUGUGUAGAGUGGCUCGUGAGUUAGGUCCUCGUUUCGUCUUGCCU  
AAGAUAGAAGCACUAGACAUAAUCAAUUUGGUUAAUUCAUCCUAUGUCUAGUGCUUCU  
AUCUUAUGGCUAAUGGCAACCGAAACGAGUCGACCU

>Guadeloupe\_mosquito\_viruses\_strain\_AP57\_segment2\_MT808050

GCUCUCGAACGGCGCAAUAGUCGCAAGCAGAAACCCGCUCGGGCUACUAGCACGUGCG  
AGGUUACUACCUUUGGACGUAAUCUCGUUCAGAGAGCUGAGCUCCUGUUCGAGAUUAA  
GGUGGCCAAAGGUAGCUCUUCACGUCUUAUUAUGAAGCCUUGCAGCCGACCUCGACC  
CGAAUGACGUGGCUAAAGACUCUGAGUGGUAGUUUCUCUCAGAUUCUUUGGCAUUCGG  
CGAGACUGGAGUAUCGCCCUGCUGUGGGGGCGAUGCAAGAUGGCUCUCUAGUCGUCGG  
AGUCGACUGGGACCCUACGACGACCGUGCCUAGUAAAAGCAAGGUCCAAGUUGUACU  
CCUAACUUUCAGGUCCCCGGUAUGGCAGAAGAAGGAGUUGACUCUCCAGCGUCUCGGU  
UGCAGAGUCGUAAAGUAUUAUGCUCUCUCAGAUUCAGGGGAUUAACCCAUGAUAGCCAA  
AACCCCUAGUGAGGCUUUGGCCUAUUUGGCUUGUUCUCGAAUAAGGAUGAGGAACAG  
UACUUUGGAGACAUCUGGAUCCACUAUAAGGUAACCCUGCAGGGGGCCUAAAUAAGGGAG  
ACGAGAUGCUCUCCAAAGUACCUCAGGACCUAGUGUGUUUGAUUAUCACAUGGUUCG  
GGAGGUAACCCUAUAUGAAGUGCGGGGCCAUUGUAAGAACUAAAUAUGAGCCCCAACAU  
AAACAGACUUCUGGAUAUUAUAAACCCUUGAGAUAUCCAGAUUGUCGAACAGGGUUAUGC  
UAAGAUUAUCAACUGCAAAACUUCAGUCAUUGGAACCGAUUUAACUAUUGUGGA  
UUAUUUAUAGCGUUUCACGAUGAUUCGAAAGUGGACAACGUGAGUGAAAUUCAAUGC  
GCUUCAAUACCCCCGACAUGGAAUGUUGAACCGUAGGAUUGGUGCACAUUGGUUUUAU  
CUUUGAAAAGUCCGUUUUUCCGAAGAUAGCGGGGGUUGAUUUUACGGUUCACUUCGU  
UUCAAUUAGGAACAAAAAUGUCCUAAGGCUCUUGAAGAAAUGAACGUUGCUAUUUCU  
GAAAGCGUAAAGAUCAAGAUUAUUGAUCAACUGAUAAAUCUUUCAAUAGUCAAGCUC  
CUAGGAGCGAUAAUUGGUUCAUGAUAAAGUUUUGUCAGUUGAUAGAAAUCUAGAUC  
AACAGCGGUAAUAAAUGUUACAUCGUCAUCAACCAAACCUAUGUGGAUUGGAGAUGG  
GAUGGUGACAUGGUGUUGGAUUAUACGCCAAUAUACAGUUCUAUAACUCUGUUACGU  
CUCUGUUGCACUUUA

>Guadeloupe\_mosquito\_viruses\_strain\_AP59\_segment1\_MT808051

UACUUUAUCCUAACUGUAAAACGAGAUGGAAACUGUGAAUGUUUUUACACCACUGU  
GAGUGACGCGGUAGGAUUAUUAUCCAUACCACUGCAGGUAGUCGCCUUAUGAUGUCA  
GCUAUAAUGAUGUCAUUUGUGGUGAACCCGUUGAAUAAAGCCAUGUUGGCGGUAUCCU  
UCUACGGGUUACCCACAAUAGACAUCAUUAUAGAUUUGGAGCCUUGCGCCAUCGAUUU  
AAGGGAUAAUCCACGAGCGAUUGUCAGAGACGUUUUCUUAAGUGCAUAUGGAAACUUU  
GGAAACGUUUUUUAUAGACUAUACGGUCUAUUUAAUGGCGAUAGCAUGUGGUUUUGU  
UAUCCUUCUUUCGAGCUAUUAUAUUGUUAUGGUGAGAAAUUGGUGGGCAAAGACCAC  
CGUGUGUUUGUGGUGCCGAAUGGCCAAGCUGGAGCUGGCACUUAUGUCAGGGAGAAAG  
CUAUGCCGGGAAGUUCUUUCGAGGUAGCCAAAGUCCUGCCUACUUUCCAGGCUAUGGU  
AAUGGCAUCGUUAGAUGGGAUUAUUUAUCACGUUAUGGGCCAGUGUUUCUGGGUCGAU  
GCAGGCUUAGUGACAGCAGCCCACGUGAUAGAGGGUUUCGAACAAUUGUGUAUCUACA  
AGGACGAAGAGAAACGCAUCGAAGUAGGACCAAAAACAUUCGAGAUCGGCAAUGGGGA  
UUACGCAGUAUGUCGCAAUCCACACUGAUAAACGCAAAAAUUGGGUUUGAGCAAAGCA

AAGUUUGCGAGGCUGGCGGUCGAAAAAGAUGCCGGCUUGAGUGUCAACAUCACAGCCA  
UGGGAAAGAGAACGAUAGGAUCCUAGAUGGACAUCCACAAUUUGGGUAUGUUCGUUA  
UACUGGAAGCACCAUCAAGGAUUCAGUGGAGCUCCUUAUAUUUUGGCAGGACCAUA  
UUUGGAAUGCAUCUGGGGUCGGACUCCAAGAACCUUGGUUAUGCUGGAGCAUUCUUGA  
AAACCGAACUCAAGCCCAGUCGGGUUAUAAGAAUCCAUAAGAACCAAGAACCGAAGA  
UCGUGCAAGUUUUCUAGAGCAGCAGUUAGAGCGUUAUCAAGAAGUAGAGUAUUCUCGA  
UCUCCGUAAGAUAUCCCGAAGAAUAGAAGGUCAGGAUUGGAGGGGAUGUAUCAUAUUGUCG  
AUCAGGAAGUGUUGAGUACCGUCUUAAGAGAAGAUAUCCGCCAAGCGAGCACAGGGGGA  
UUUACAAUAUUUGGCUGCACAAGCCAAAGUUGGGCCCCUCAUCGAUCUCGAAGCUGUA  
ACCACUCAGGGAGACCUUACUGGGUCUCAACAGAGUGGACAAAAACAGCACCAGGAGC  
UUUCUACAGAGACGGAUCCGAUAAUAGCCAUGACUCAAGGGCUAUUGUCAGAAUUUGG  
CAAAACCUAGUGUACGUUCCUCCAGAACCUCAGAGUUAAAGACCAAGGGACAUGCAC  
UAGUUGUGAGUCUUGUGGGCGCCUAUAUAUAUUGGGGGGAGUCUAGGGGAUAUUCUGAA  
ACGCCUACUGCGGAUGCCAAGAAAGCGGAAGAUUUACCUUUGGCGCCUAGGAAUGCCA  
UGUCGUUUAAUGAUUCGGAAAACCUGCUCAGGGCUCAGCUGUACUUGUUGGGGCCCCG  
UGGCAUGGAAUAUCAGAGGCGCUAAAGUGUACAAGAGCCACGACUUGCCAAGAUGCAA  
GAAAUGGAUUGCAUGUGCCAGAAACCUUUGGAGACCUGCCUUAUGGAAUCCCGUACA  
UUGACGCGUGCUCCGCCAAAAGAAGCUUCCGCACGCACUGUCAGAAACAAAAACAGAC  
GGAUGCGCCGCCAACAGCAGAAGAAAGAACUAGAGCAGUUAAGCAGCUCUACGGACC  
UAUUCGCAUGGAGGUGUGACCUCACAUCCGCAGCAGAUCCCCACAAUUGGUUUGAUA  
GGGAAUUCAAUAAAGCACUAGAGGAGAUAGAUUAGGAUAGCACUCCUGGCUACUGUAU  
UUUGACUCUUUUAGGCUCUACGAAUGCGCAAUCUUCGGUUGGAAUGGUUAUAGCUGU  
GAUCCGGAUAGAGUUAGUAUGGUACGAGAGCAUGUCAAAUUAAGGUUCAUAGAGUUG  
UUGGCAGGUAAGGCUGUGAGCGAUUGUAUUAAGGUUUUUGUGAAGCAAGAGCCGCAUA  
AAAUGAAGAAAAUUCAGGAAGGUACUUAUCGCUUGAUAAAGCGCUGUAAGCUUAAUUGA  
UACCUUUUAUUGACAGAAUUUUGUUCGCUUGGAUAGCCAGAGCUCAGAUUGGAUUCGUC  
GGGGAGACGCCAUGUCUCAUCGGGUGGAGUCCAGUUAGAGGCGGAUGGCGUAAGAUAG  
UGAACAGGUUUGGCAACCAAGCAGUAAAUUGUUUAGAUAGAUCGGCUUGGGAUUGGAC  
UGUACAAGGCUAUGUACUUGAUCUUUGGAUAUUGUUUUUGGAAAAUUUACCAGUGAA  
UCCUCCAGACUGGUGGCUUAAGAUGAUGAAACUACGUUUUAAGCUACUGUUUGAAGAG  
GUUUGGUUUCAGUUCGAAGACGGAACAAGAGUAAAGCAGGCAACGCGAGGAGUAAUGA  
AGAGUGGUUGCUAUUUAAACUAUUUUGUUAAAUAGUCUUAGCCAAAGUCUCUUAUAUA  
CGUAGUCAACAGUAGAUGUGGGGAAGCCCAUGACCAUGAAACAACCAUACUCGAUAGGU  
GAUGACACGGUACAGGAAGCUAUGGAUUGGCUUCUAGACUAUGUUAGACAACUCGAGA  
UAUUGGGAAUCACGGUCAAAAGGAGCUAAAGUCCAGCAUUGGGUUGAAUUUGCGGGGUU  
CUGUUUUGACGGGAAAACUUGUUAUCCGGCAAACUGGCAAAAAAGCCUCUACACCGUU  
AAGUAUACGCAAAAUCUUGGGGAGACUUUGCGUACUCUACACACAAAUUCGUACGUCA  
AUGAGCCUGUGAUGUACGAAUUUGUGUGUAGAGUGGCUCGUGAGUUAGGUCCUCGUUU  
CGUCUUGCCUAAGAUAGAAGCACUAGACAUAAUGAAUCAACCAAAUUGAUCCUAUGUC  
AAGUGCUUCUAUCUAUCUAAUGGUGAGUGAAACGGGAUGAGUUGGCAACAAUAGUGG  
UUUGCCAACUCAUCCCGUUUCACUCACCAUUAAGA

>Guadeloupe\_mosquito\_viruses\_strain\_AP59\_segment2\_MT808052

CCGGGCCCGGCGUCUCCUCCUCGUUUCUUAUUGCGCUUAUUGCGCCGUUUCUUAUCAGA  
AGCGUUAGGUUGCGGAGUCGUAAAGUAUUUAGCUCUCUCAGAUUCAUGGGUAUAUCCCC  
UGAAUCUGAGAGAGCAUAAUACUUACGACUCUGCAACCGAGACGCUGGGAGAGUCAAC  
UCCUUCUUCUGCCAUAACGGGACCUGAAAGUUAGGAGUACAACUUUGGACCUUGCUUU  
UACUAGGCACGGUCGUCGUAGGGUCCAGUCGACUCCGACGACUAGAGAGCCAUCUUU  
CAUCGCCCCACAGCAGGGCGAUACUCUAGUCUCGCGGAUGCCAAAUUAUCUGAGAG

AAACUACCACUCAGAGUCUUUAGCCACGUCAUUCGGGUCGAGGUCGGCUGCAAGGCUU  
CAUAAUAAGACGUGGAAGAACUACCAUGGGGCCACCUUAAUCUCGAACAGGAGCUCAGC  
UCUCUGAACGGUAAUACGUCCAUCAGCAGAAACCCCGCUCAGCGGCUCUCCACGCUUC  
UGCUAAGAAACGGCGCAAUAGGCGCAAUAGAAACGUGGAGGAGCCGCUGGCCCCGAGC  
GGGGGUUCUGCUGAUGGACGUAUUACCGUUCAGAGAGCUGAGCUCCUGUUCGAGAUUA  
AGGUGGCCAAAGGUAGUUCUCCACGUCUUAUUAUGAAGCCUUGCAGCCGACCUCGAC  
CCGAAUGACGUGGCUAAAGACUCUGAGUGGUAGUUUCUCUCAGAGUCUUUGGCCACGU  
CAUUCGAGACUAGAGUAUCGCCCUGCUGUGGGGGCGAUGAAAGAUGGCUCUCUAGUCG  
UCGGAGUCGACUGGGACCCUACGACGACCGUGCCUAGUAUAGGCAAGGUCUGGGGCUU  
UGUCUAUCAUGGGUAUAUCCCAAUCUGGGGAGAGCAUAAUACUACGACUCUGCAACCG  
AGACGCUGGGAGAGUCGUAAGUAUUAUGCUCUCUCAGAUUCAGGGGAUAUACCCAUGA  
UAGACAAAGCCCCUUGUGAGGUUUUGGCCUAUUUGGCUUGUCCUCGAAUAAGGAUGA  
GGAACAGUACUUUGGAGACAUCUGGAUCCACUAUAAGGUAACCCUGCAGGGGGCCUAAA  
UAGGGAGACGAGACGCCCCCCCCCAUUACCUCAGGACCUAGUGUGUUUGAUUACCACA  
UGGUUCGGGAGGUAACCCUAUAUGAAGUGCGGGCCAUUGUAAGAACUAAAUAUGAGCC  
CCAACAUAAACAGACUUCUGGAUAUUAUAAACCUUUUGAGAUCAGAUUGGCGAACAGG  
GAUAUGAUAAACGUAUGCAGCGGCGGCUGAGGCUACAGGUUCAACAUUCCAUGUCGGGG  
GUCUCGAAGCGCAUUGUAAUUUCACUCACGUUGAUUCCACUUUCGACAUCGUGAGUGA  
AAUUCAAUGCGCUUCGAGACCCCCGACAUGGAAUGUUGAACCUGUAGGAUUGGUGCAC  
AUUGGUUUUAUCUUUGAAAAGUCCGUUUUUCCGAAGAUAGCUAUGUUUGAUUUUACGG  
UUCAUUUCGUGUCAAAUAGGAACAUCUUUGUCCUAAGGCUCUUAAGAAGUGAACGU  
UGCUAUUUCUGAGAGCGCGAAGAUCAAGGUUAUUGGUCCUGUAAUGAAUCUUUCAAU  
AGUCAAGCUCCUAGGAGCGAUAAUUGGUUCAUGAUAAAGUUUGUCAGUUGAUAGAAA  
UCUUAGAUAACAGCGGUAAUAAAUGUUAACAUCGUCAUCAACCAAACCUAUGUGGA  
UUGGAGAUGGGAUGUUAACAUGCUGUUGGAUCUAAGAUUUCUAUCAACGUGGCAAAAC  
UUUAUCAUGAACCAAUUAU

>Guadeloupe\_mosquito\_viruses\_strain\_AP60\_segment1\_MT808053

GUUAUUUACACCACUGUGAGUGACGCGGUAGGAUAUAUUUCCAUACCACUGCAGGUAG  
UCGCCUUAUAUGAUGUCAGCUAUAUAUGAUGUCAUUUGUGGUGAACCCGUUGAAUAAAGC  
CAUGUUGGCGGUAUCCUUCUACGUGCAAACCGAACAUUGGCUUUAUUCACGGGUUCACC  
CAAUUGACAUCGAUUGAAGGGAUAAUCCACGAGCGAUUGUCAGAGACGUAUUCUAAAG  
UGCAUAUGGAAACUUUGGAAACGUUUUUAUUGGACUAUACUGCGUAUUCCCCAUUGCC  
GAUCUCGAAUGUUUUUGGUCCUACUUCGAGCUAUAUAUAUGUUGAGGUGAGAAAUUGG  
UGGGCAAAGACCACCGUGUGUUUGUGGUGCCUAAUGGCCAAGCUGGAGCUGGCACUU  
AUGUCAGUGAGAAAGCUAUGCCGGGAAGUUCUUUUGAGGUAGCUAAAGUCCUGCCUAC  
UUUCCAGGCUAUGGUAAUGGCAUCGUUAGAUGGGAUUACCUAUCCCGUAAUGGGCCAG  
UGUUUCUGGGUCGAUGAAGGCUUAGUGACAGCAGCCCAGGUGAUUGGGGGUUUUGAAU  
AUUUGUGUAUCUACAAGGAUGAAGAGAAACGCAUCGAAGUAGGAUCAAAAACAUCGA  
GAUCGUCAAUGGGGAUUACGCAGUAUGUCGCAAUCCAACACUGAUAAACGCAAAAAUUG  
GGUUUGAGCAAAGCAAAGUUUGCGAGGCUGGCGGUCGAAAAAGAUGCCGGCUUGAGUG  
UUAACAUCACAGCCAUGGGAAAGAGAACGAUAGGAUUCUAGAUAGACAUCCACAAUU  
UGGGUAUGUUCGUUAUAGUGGAAGCACCAUUAAGGAUUUAGUGGAGCUCCUACUUAU  
UUUGGCAGGACCAUAUUUGGAAUGCAUCUAGGGUCCUAUCGUUCUCUUUCCUAUCGUU  
CUCUUUCCGCAUUCUUGAAAACUAAACUCAAGCCCAGUCGGGUUAUAAGAAACCAGUU  
AAAUUUAAGAACUGAAGAUAGUGCAAGUUUCUAGAGCAGCAGUUAGAGCGUUAUGA  
AGAAGUAGAGUAUUCUAGAUCUCCGUUAUAUCCCGAUGAAUAUAAGGUUAGGAUUGGA  
GGGAUGUAUCAUAUUGUUGAUGAGGAAGUGUUGAGUACCGUCUUAAGAGAAGAUC  
GCUAAGCGAGCACAGGGGGAUCUUCUCUUUAAGACGGUACUACAACUGAAGUUGGGC

CCCUUAUUGAUCUCGAAGCUGUGUCCACUCUGGGAGACCUAGUAAGGUCUCAACAGAG  
UGGACAAAAACAGCACCAGGAGCUUUCUACUGAGACGGAUCCGAUAAUAGCUAUGUCU  
ACAGGGCUAUUGUCAGAAUUUGGCAAAACCUCAGUGUACGUUCCUCCAGAACCUAAGA  
GUAAAGACCAAGGGACAUGCACUAGUUGUGAGUCUUGUGGGCGCCUAUAUAUAUUGGGG  
GGAGUCUAGGGAUAUUCCUGAAACGCCUACUGCGGAUGCCAAGAAAGCGGAAGAUUUA  
CCUUUAGCGCCUAGGAAUGCCAUGACGUUUAUAGAUUCGGAAAACCUGAUCAGGGCUC  
CAGCUGUCCGCUUUCUUGGCAUCCGCAGUAGGGAAUAUCAGAGGGAAAGUGUACAGAG  
CCACGACUUGCCAAGAUGCAAGAAAAUGGAUUGCAUGUGCCAGAAACCUUUGGAGACC  
UGCCUUAUGGAAUCCCGUACAUUGACGCGUGCUCCGCUAAAAGAAGCUUCCGCACGCA  
CUGUCAGAAACAAAAACAGACGGAUGCGCCGCCAACAGCAGAAGAAAGAACUAGAGCA  
GUUCAAGCAGCUCUACGGACCUAUUCGCAUGGAGGUGUGACCUCACAUCCGCAGCAG  
AUCCCCACAAAUGGUUUGAUAGGGAAUCAAUAAAGCACUAGAGGAGAUAGAUUAGGA  
UAGCACUCCUGGCUACUGUAUUUUGACUCUUUAGGCUCUACGAAUGCGCAAUUCUUC  
GGUUGGAAUGGUUAUUGCUGUGAUCCGGAUAGAGUUAGUAUGGUACGAGAGCAUGUC  
AAAUUAAGGUUCAUUGAGUUGUUGGCAGGUAAGGCUGUGAGCGAUUGUAUUAAGGUU  
UUUGUGAAGCAAGAGCCGCAUACAAUGAACAAAAUUCUGAACAGCGCUUAUCAAGCGA  
UAAGCGCUGUAAGCUUAAUUGAUACCUUUAUUGACAGAAUUUUGUUCGCUUGGAUAGC  
CAGAGCUCAGAUGGAUUCGUCGGGGAGACGCCAUGUCUCAUCGGGUGGAGUCCAGUU  
AGAGGCGGAUGGCGUAAGAUAGUGAACAGGUUUGGCAACCAAGCAGUAAAUUGUUUAG  
AUAGAUCGGCUUGGGAUUGGACUGUACAAGGCUAUUUAGUUGAUCUUUGGAUUAUGU  
UUUUGGAAAAUUUACCAGUGAAUCCUCCAGACUGGUGGCUUAAGAUGAUGAAACUACG  
UCUUAAGCUACUGUUUGAAGAGGUUUGGUUUCAGUUCGAAGACGGAACAAGAGUAAAG  
CAGGCAACGCGAGGAGUAAUGAAGAGUGGUUGCUAUUUAAACAAAAUUGUUAUUUAGUC  
UUAGCCAAAGUCUCUUAUACUACGUAGUCAACAGUAGAUGUGGGAAGCCCAUGACCAU  
GAAACAACCAUACUCGAUAGGUGAUGACACGGUACAGGAAGCUAUGGAUUGGCUUCUA  
GACUAGUUAGACAACUCGAGAUUUUGGGAUACAGGUCAAAGGAGCUAAAGUCCAGC  
AUUGGGUUGAAUUUGCGGGGUUCUGUUUUGACGGGAAAACUUGUUAUCCGGGCAUACUG  
GCAAAAACAUCUUUUUAACCUUAAGUAUACGCAAAAUCUUGGGGAGACUUUGCGUAGU  
CUACACACAAAUUCGUACGUCAAUGAGCCUGUGAUGUACGAAUUUGUGUGUAGAGUGG  
CUCGUGAGUUAGGUCCUCGUUUCGUCUUGCCUAAAGAUAGAAGCACUAGACAUAUASAA  
USGACCUAACUCACGAGCCACUCUACAAGUUCUCUUCUAUCUAAUGGUGAGUGAAACG  
GGAUGAGUUGGCAAACAAUA

>Guadeloupe\_mosquito\_viruses\_strain\_AP60\_segment2\_MT808054

AAAAUAAGCAAUUUAACUCACUUGAAUGUAAGUGCAGCAACCUAAGGAAGCAUAUCAU  
CUACCUUACUUAAAUUUCUGUUUUUUAAACACAAUGAGUAAACAGUUGAAGAAACAGC  
UUGCAUCUUUAACUGCUCAAGUAGCUGCGAUGAGGGUUGCCAAACCGCAACCUAACGC  
UUCUGCUAAGAAACGGCGCAAUAGGCGCAAUAAGAAACGUGGAGGAGCCGACGGCCCG  
AGCGGGGUUUCUGCUGAUGGACGUUUUACCGUUCAGAGAGCUGAGCUCCUGUUCGAGA  
UUAAGGUGGCCAAAGGUACUUUUACUAGGCACGGUCGCGUAGGGUCCAGCCGACCUC  
GACCCGAAUGACGUGGCUAAAGUCUCUGAGUGGUAGUUUCUCUCAGAUAAUUUGGCAU  
UCCGCGAGACUAGAGUAUCGCCCUGCUGUGGGGGCGAUGAAAGAUGGCUCUCUAGUCG  
UCGGAGUCGACUGGGACCCUACGACGACCGUGCCUAGUAAAAGCAAGGUCCAAGUUG  
UACUCCUAACUUUCAGGUCCCCGGUAUGGCAGAAGAAGGAGUUGACUCUCCAGCGUCU  
CGGUUGCAGAGUCGUAAGUAUUUUGGUCUCUCAGAUUCAGGGGGUAUACCUGCGGUAG  
ACAGAUCCGAGGGUGCGGGGGACGCCUACUUGGCUUGUUCUCCGAAUAAGGAUGAGGA  
ACAGUACUUCGGAGACAUCUGGAUCCACUAUAAGGUAACCCUGCAGGGGGCCUAAAUAAG  
GGAGACGAGACGCCCCCCCCAUCGCCUCCAGGACCUAGUGUGUUUGAUUACCACAUGGU  
UCGGGAGGUAACCCUAUAUGAAGUGCGGGCCAUUGUAAGAACUAAAUAUGAGCCCCAA

CAUAAACAGACUUCUGGAUAUUUAUAAACCUUUUGAGAUCCAGAUGCUGAACUGGGUAU  
UGAUAACGUAUGCAGCGGCGGCUGAGGUUUUAGUCAAUUGGAACCGAUUUAACUAUUGA  
GGAUAAUUAUAGCGUUUCUCACGAUGAUUCGAAAGUUGACAACUUGCUUGAAAGCCUA  
GGAACAAAAAUGUUCCUGACAUGGAAUGUUGAACCUGUAGGAUUGGUGCACAUUGGUU  
UAUCUUUGAAAAGUCCGUUUUUCCGAAGAUAGCGAUGUUUGAUUUUACGGUUCAUUU  
CGUGUCAAAUAGGAACAUUUUUGUUCCUAAGGCUCUUAAGAAGUGAACGUUGCUAUU  
UCUGAGAGCGUAAAGAUCAAGGUUAUUGGUCAACUGAUAAAUCUUUUCAAUAGUCAAG  
CUCCUGCUAUAGGAAAUAGGUUCUUGAUUUCGCGCUCUCAGUUAUAGGAACGUUACU  
UCUAAGAGCGGAUUAAGACGCUAAGAUCGUCAUAAACUACGUCUCUGUGCAUUGGUGG  
AUGACG
